1 **SMARCAD1 Mediated Active Replication Fork Stability Maintains Genome Integrity**

2

3 **SMARCAD1 Stabilizes Active Replication Forks**

4

5 Calvin Shun Yu Lo<sup>1</sup>, Marvin van Toorn<sup>1,2,9</sup>, Vincent Gaggioli<sup>1,9</sup>, Mariana Paes Dias<sup>3</sup>, Yifan  
6 Zhu<sup>1</sup>, Eleni Maria Manolika<sup>1</sup>, Wei Zhao<sup>1</sup>, Marit van der Does<sup>1</sup>, Chirantani Mukherjee<sup>1</sup>, João  
7 G S C Souto Gonçalves<sup>8</sup>, Martin E van Royen<sup>4</sup>, Pim J French<sup>5</sup>, Jeroen Demmers<sup>6</sup>, Ihor Smal<sup>1</sup>,  
8 Hannes Lans<sup>1</sup>, David Wheeler<sup>7</sup>, Jos Jonkers<sup>3</sup>, Arnab Ray Chaudhuri<sup>1</sup>, Jurgen A Marteijn<sup>1,2</sup>,  
9 Nitika Taneja<sup>1\*</sup>

10

11 <sup>1</sup>Department of Molecular Genetics, <sup>2</sup>Oncode Institute

12 Erasmus University Medical Center,

13 Dr. Molewaterplein 40, 3015GD Rotterdam, The Netherlands

14

15 <sup>3</sup>Division of Molecular Pathology and Cancer Genomics Centre,

16 The Netherlands Cancer Institute,

17 Plesmanlaan 121, 1066 CX Amsterdam, The Netherlands.

18

19 <sup>4</sup>Department of Pathology, Cancer Treatment Screening Facility (CTSF),

20 Erasmus Optical Imaging Centre (OIC), Erasmus University Medical Center,

21 Wytemaweg 80, 3015 CN Rotterdam, the Netherlands.

22

23 <sup>5</sup>Department of Neurology and Cancer Treatment Screening Facility (CTSF),

24 Erasmus University Medical Center, Erasmus MC Cancer Institute,

25 Rotterdam, The Netherlands.

26

27 <sup>6</sup>Department of Biochemistry, Erasmus University Medical Center,

28 Wytemaweg 80, Rotterdam 3015CN, The Netherlands

29

30 <sup>7</sup>Laboratory of Biochemistry and Molecular Biology,

31 National Cancer Institute, National Institutes of Health,

32 Bethesda, MD, 20892, USA

33

34 <sup>8</sup>Division of Radiation and Genome Stability, Department of Radiation Oncology,

35 Dana-Farber Cancer Institute, Harvard Medical School, Boston, MA, USA.

36

37 <sup>9</sup>These authors contributed equally to this work

38

39 \*To whom correspondence should be addressed:

40 Email: [n.taneja@erasmusmc.nl](mailto:n.taneja@erasmusmc.nl)

41

42

43

44

45

46

47

48

49

50

51

52

53

54

55

56

57

58

59

60

61

62

63

64

65

66

67

## 68 **ABSTRACT**

69 Stalled fork protection pathway mediated by BRCA1/2 proteins is critical for replication fork  
70 stability that has implications in tumorigenesis. However, it is unclear if additional mechanisms  
71 are required to maintain replication fork stability. We describe a novel mechanism by which  
72 the chromatin remodeler SMARCAD1 stabilizes active replication forks that is essential for  
73 resistance towards replication poisons. We find that loss of SMARCAD1 results in toxic  
74 enrichment of 53BP1 at replication forks which mediates untimely dissociation of PCNA via  
75 the PCNA-unloader, ATAD5. Faster dissociation of PCNA causes frequent fork stalling,  
76 inefficient fork restart and accumulation of single-stranded DNA resulting in genome  
77 instability. Although, loss of 53BP1 in SMARCAD1 mutants restore PCNA levels, fork restart  
78 efficiency, genome stability and tolerance to replication poisons; this requires BRCA1  
79 mediated fork protection. Interestingly, fork protection challenged BRCA1-deficient naïve- or  
80 PARPi-resistant tumors require SMARCAD1 mediated active fork stabilization to maintain  
81 unperturbed fork progression and cellular proliferation.

82

## 83 **INTRODUCTION**

84 Most BRCA-mutated cancers acquire resistance towards chemotherapeutic agents such as  
85 cisplatin and PARP inhibitors (PARPi) (1). At present, besides the restoration of homologous  
86 recombination (HR), loss of PAR glycohydrolase (PARG) or acquired protection of stalled  
87 replication forks provides a mechanism that can promote drug resistance in BRCA-deficient  
88 genetic background (1-4). However, identification of additional mechanisms underlying  
89 resistance to chemotherapeutics can provide a real opportunity to improve therapies in BRCA-  
90 deficient cancer patients.

91 BRCA-proteins play a genetically separable role at the site of double-stranded breaks  
92 (DSBs) where they mediate an error-free HR repair and at replication forks where they  
93 facilitate protection of reversed forks from extensive nuclease-mediated degradation, to  
94 maintain genome stability (2, 3, 5-7). Similarly, the factors of non-homologous end joining  
95 (NHEJ), an error-prone pathway, along with their role in repair of DSBs have been shown to  
96 associate with stalled forks either for their protection or to promote their restart (2, 8, 9).  
97 However, the factors involved in limiting fork stalling and subsequent restarting of forks upon  
98 endogenous or exogenously induced replication stress are poorly understood.

99 Proliferating Cell Nuclear Antigen (PCNA) is a DNA clamp that associates with the  
100 active replication forks and functions as a processivity factor for DNA polymerases to carry  
101 out the DNA synthesis process but dissociates from stalled forks via an active unloading

102 mechanism (8, 10-12). During replication, PCNA rings are repeatedly loaded and unloaded by  
103 the replicating clamp loader replication factor C (RFC) complex (13) and an alternative PCNA  
104 ring opener, ATAD5 (ELG1 in yeast)-replication factor C-like complex (ATAD5-RLC).  
105 ATAD5-RLC unloads replication-coupled PCNA after ligation of Okazaki fragment and  
106 termination of DNA replication (14-16). Maintenance of the delicate balance of PCNA levels  
107 onto DNA is crucial since PCNA levels can influence chromatin integrity (17-19) and  
108 persistent PCNA retention on DNA causes genome instability (20-22). However, mechanisms  
109 by which PCNA levels are regulated on replicating chromatin and the factors involved in this  
110 process, still remain elusive.

111 Here we uncover a novel function of human SMARCAD1 in regulating the fine control  
112 of PCNA levels at forks, which is required for the maintenance of replication stress tolerance  
113 and genome stability. SMARCAD1, a DEAD/H box helicase domain protein, belongs to a  
114 highly conserved ATP-dependent SWI/SNF family of chromatin remodelers. ATPase  
115 remodeling activity of SMARCAD1 is crucial for its function in HR repair as well as in  
116 maintenance of histone methyl marks for re-establishment of heterochromatin (23, 24).

117 In this study, we generated a separation-of-function mutant of human SMARCAD1,  
118 efficient in its HR function but defective in its interaction with the replication machinery. This  
119 strategy led to uncover a previously unrecognized role of SMARCAD1 in maintaining stability  
120 of active (unperturbed and restarted) replication forks, which is responsible for mediating  
121 resistance towards replication poisons. In the absence of SMARCAD1, replication fork  
122 progression requires BRCA1 to maintain the integrity of stalled forks to allow their restart.  
123 Furthermore, SMARCAD1 maintains replication fork stability and cellular viability in BRCA1  
124 deficient naïve or chemoresistant mouse breast tumor-organoids, highlighting its essential role  
125 in the survival of tumor cells. Our results suggest a conserved role of SMARCAD1 and BRCA1  
126 proteins at replication forks, SMARCAD1 at active forks while BRCA1 at stalled forks, to  
127 safeguard replication fork integrity and ensure genome stability.

128

## 129 **RESULTS**

### 130 **SMARCAD1 is preferentially enriched at unperturbed replication forks**

131 Most factors associated with the active replisome are required to maintain the stability of the  
132 replication forks and could also be important for mediating efficient restart after stalling. In  
133 order to specifically identify novel factors involved in the stability of unperturbed forks, we  
134 performed isolation of Proteins On Nascent DNA (iPOND) coupled to Stable Isotope Labeling  
135 with Amino acids in Cell culture (SILAC)-based quantitative mass-spectrometry (8, 25).

136 Mouse embryonic stem cells (mESC) were used to compare the proteins present at unperturbed  
137 active replication forks vs hydroxyurea (HU)-induced stalled replication fork (fig. S1A). In  
138 total 1443 common proteins were identified from two independent experiments (fig. S1, B and  
139 C). Consistent with previous reports, we observed a greater than two-fold increase in  
140 replication stress response proteins, including RAD51 and BRCA1, at stalled forks (Fig. 1A)  
141 (8, 25). Levels of core components of the replicative helicase, such as MCM6, remained largely  
142 unchanged during early replication stress (Fig. 1A). As shown previously (8), PCNA was  
143 enriched ~2-fold at the unperturbed forks when compared to the stalled forks, confirming that  
144 PCNA associates preferentially with active forks and showing proof-of-principle of this  
145 approach (Fig. 1A and fig. S1B). Among 66 proteins showing preferential enrichment at  
146 unperturbed replication forks (Fig. S1C), we identified SMARCAD1, a conserved SWI/SNF  
147 chromatin remodeler (Fig. 1A and fig. S1B). Interestingly, KAP1/ TRIM28, a previously  
148 reported SMARCAD1 interacting partner, showed no preferential enrichment, a behavior that  
149 is similar to that of the MCM6 helicase, suggesting an additional and independent role of  
150 SMARCAD1 in replication fork dynamics (Fig. 1A) (8).

151 To confirm our iPOND-SILAC-MS data and to assess if the preferential enrichment of  
152 SMARCAD1 and PCNA at unperturbed replication forks is conserved across species, we  
153 performed immunofluorescence assays to measure the localization of these proteins with  
154 respect to the sites of replication in MRC5 human fibroblast cells. Sites of active DNA  
155 replication were labelled with EdU, and the localization of the chromatin-bound fraction of  
156 SMARCAD1, PCNA and RAD51 within the sites of replication was measured in the presence  
157 or the absence of hydroxyurea (HU) using single-cell based, high-content microscopy.  
158 Consistent with the results of iPOND-SILAC-MS in mESCs, we observed that chromatin  
159 bound SMARCAD1 and PCNA foci specifically colocalized with EdU. However, upon HU  
160 treatment both these proteins showed a significant decrease in intensity at replication sites,  
161 suggesting that both SMARCAD1 and PCNA associate with unperturbed replication forks but  
162 dissociate from stalled forks (Fig. 1, B and C). As expected, RAD51 was found to be enriched  
163 significantly at replication sites upon HU treatment, suggesting a positive enrichment at stalled  
164 forks in contrast to PCNA and SMARCAD1 (fig. S1D) (8, 25).

165

#### 166 **NΔ-SMARCAD1 lacks PCNA interaction and thereby, association with replication forks**

167 The N-terminal region of SMARCAD1 has been shown to be responsible for the PCNA-  
168 mediated localization of SMARCAD1 to replication forks (24, 26). To explore the role of this

169 interaction at replication forks, we generated a SMARCAD1 mutant, using MRC5 cells, in  
170 which the canonical start site is disrupted, and translation begins downstream at the next  
171 available start codon (Fig. 1D). Expression of this mutant gene results in a 137 amino acids N-  
172 terminally truncated product, designated as N $\Delta$ -SMARCAD1 that lacks the region responsible  
173 for its interaction with PCNA (26). The N $\Delta$ -SMARCAD1 protein is approximately 100 kDa in  
174 size (Fig. 1E) and retains the downstream CUE1, CUE2, ATPase and Helicase domains (fig.  
175 S1E), crucial for chromatin remodeling and DNA repair functions (24, 27), intact. For  
176 comparative analysis, we also generated a complete SMARCAD1 knockout (SMARCAD1<sup>-/-</sup>)  
177 by replacing the SMARCAD1 gene with a mClover (a GFP variant) reporter gene (Fig. 1E).  
178 Both qRT-PCR assays of the SMARCAD1 coding region as well as RNASeq-based  
179 transcriptome analysis of cells containing the full length (WT) and those containing the  
180 truncated form (N $\Delta$ -SMARCAD1) confirmed that expression levels of the two SMARCAD1  
181 alleles were nearly identical (fig. S1, E and F). As expected, cells containing the knockout,  
182 SMARCAD1<sup>-/-</sup>, showed a lack of transcripts specific to the coding region of the gene.

183 To test the interaction between PCNA and the N $\Delta$ -SMARCAD1 mutant, we generated  
184 a heterogeneously expressed GFP-tagged PCNA allele in both WT and N $\Delta$ -SMARCAD1  
185 genetic backgrounds (fig. S1G). Crosslinked chromatin immunoprecipitation of GFP-tagged  
186 PCNA confirmed that even though N $\Delta$ -SMARCAD1 associates with chromatin, it did not  
187 interact with GFP-PCNA, whereas the full-length wildtype SMARCAD1 protein retains this  
188 interaction (fig. S1H) as previously reported (24). Similarly, reverse chromatin  
189 immunoprecipitation of WT-SMARCAD1 and N $\Delta$ -SMARCAD1 protein confirmed the lack  
190 of interaction between PCNA and N $\Delta$ -SMARCAD1 protein (Fig. 1F). To determine whether a  
191 SMARCAD1 interaction with PCNA is required for its association with replication sites, we  
192 performed an immunofluorescence analysis to measure the localization of SMARCAD1  
193 mutants at sites of DNA replication marked with EdU. Our data show that chromatin bound  
194 foci of full length SMARCAD1 colocalized with EdU positive sites as previously reported (24)  
195 (Fig. 1G). As expected, no specific SMARCAD1 signal could be seen in SMARCAD1  
196 knockout (SMARCAD1<sup>-/-</sup>) cells. Consistent with our crosslinked IP data (Fig. 1F and fig. S1H),  
197 N $\Delta$ -SMARCAD1 showed nuclear localization but no colocalization with EdU signals (Fig.  
198 1G), suggesting that N $\Delta$ -SMARCAD1 associates with chromatin but is not enriched at sites of  
199 replication.

200

201 **Role of SMARCAD1 at the replication fork and not in HR, mediates tolerance to**  
202 **replicative stress**

203 Next, we sought to determine if loss of SMARCAD1 association with replication forks affects  
204 cellular resistance to fork stalling agents such as hydroxyurea (HU), cisplatin or the PARP  
205 inhibitor, olaparib. Both  $\Delta$ -SMARCAD1 and SMARCAD1<sup>-/-</sup> cells showed significant  
206 sensitivity to the replication poisons, suggesting that the presence of SMARCAD1 at  
207 replication forks is crucial for resistance to replication stress (Fig. 1H). To further explore the  
208 role of SMARCAD1 during DNA replication, we analyzed S phase progression by measuring  
209 EdU incorporation using high-content microscopy. We imaged >2000 cells and plotted for  
210 quantitative image-based cytometry analysis (QIBC) to obtain single-cell based cell cycle  
211 profile (28). Both  $\Delta$ -SMARCAD1 and SMARCAD1<sup>-/-</sup> cells displayed reduction in EdU  
212 intensities relative to WT cells suggesting loss of SMARCAD1 at forks causes DNA  
213 replication defects (fig. S1I).

214 Since the loss of SMARCAD1 causes defects in HR repair of DSBs due to inefficient  
215 DNA end-resection (23, 27, 29), we next tested whether cells expressing  $\Delta$ -SMARCAD1  
216 also exhibited defects in HR repair. We measured HR efficiency using a DR-GFP reporter  
217 assay (30). Remarkably,  $\Delta$ -SMARCAD1 cells had an HR efficiency similar to that of WT  
218 (Fig. 2A). However, HR efficiency was significantly reduced in both, WT and  $\Delta$ -  
219 SMARCAD1 cells when SMARCAD1 was knocked down in these cells using siRNA, similar  
220 to that observed for BRCA1 knockdown (Fig. 2A). These data suggest that, although the  
221 complete loss of SMARCAD1 results in defective HR, expression of the truncated  $\Delta$ -  
222 SMARCAD1 retains HR proficiency. Additionally, chromatin fractionation and observation of  
223 RAD51 focus formation by immunofluorescence using high content microscopy, both showed  
224 a remarkable increase in chromatin-bound RAD51 upon olaparib treatment in both WT and  
225  $\Delta$ -SMARCAD1, but not in SMARCAD1 deficient cells (Fig. 2, B and C). This data further  
226 confirms that  $\Delta$ -SMARCAD1 cells are proficient in the loading of RAD51 in response to  
227 DNA damage unlike SMARCAD1<sup>-/-</sup>. Surprisingly however, both the mutants show similar  
228 sensitivity towards drugs causing replication stress, olaparib, cisplatin and HU (Fig. 1H, 2D  
229 and fig. S2A), arguing in favor of an uncoupling between HR repair function and resistance to  
230 replication stress in the  $\Delta$ -SMARCAD1 cells, corroborating it to be a separation-of-function  
231 mutant.

232 We also performed transcriptome analysis to test whether the drug sensitivity observed  
233 in SMARCAD1 mutant cells could be a result of transcription deregulation of DDR genes in

234 these cells, since transcription may be affected by its chromatin-remodeling role. We observed  
235 a mild dysregulation in a subset of non-DDR genes ( $\geq 1.5$  fold change in expression) in either  
236  $\Delta$ -SMARCAD1 or SMARCAD1<sup>-/-</sup> cells whereas almost no anomalous expression was  
237 observed in either mutant for a set of DDR genes (N=179) (31), that included both HR and  
238 NHEJ DNA damage response genes (fig. S2B). This suggests that the function of SMARCAD1  
239 in promoting drug tolerance is unrelated to its role in heterochromatin maintenance or in  
240 transcriptional regulation. Furthermore, the efficient loading of RAD51 and the HR proficiency  
241 of cells expressing  $\Delta$ -SMARCAD1, in contrast to those lacking SMARCAD1, is most likely  
242 not due to a differential transcriptome or cell cycle profile but due to the presence of intact  
243 CUE and ATPase-Helicase domains in  $\Delta$ -SMARCAD1 that are essential for its HR function  
244 (23, 29). Intriguingly, the loss of PCNA interaction and association with the fork is the main  
245 cause for SMARCAD1 depleted cells to show sensitivity towards replication stress inducing  
246 drugs.

247 **SMARCAD1 facilitates normal replication fork progression and efficient restart upon**  
248 **replication stress**

249 SMARCAD1 mutants displayed moderate but significant defects in progression through S  
250 phase (fig. S1I). To further monitor the dynamics of individual replication forks we performed  
251 DNA fiber assay. We sequentially labeled WT and SMARCAD1 mutants ( $\Delta$ -SMARCAD1  
252 and SMARCAD1<sup>-/-</sup>) cells with CldU (red) and IdU (green), followed by track length analysis.  
253 Interestingly,  $\Delta$ -SMARCAD1 cells exhibited a significant difference in the track lengths of  
254 both CldU and IdU in comparison to WT but similar to SMARCAD1<sup>-/-</sup> cells (Fig. 3A). To test  
255 the possibility that accumulation of DNA damage over time in the mutant cells was causing  
256 the replication fork defect observed, we also analyzed fork progression in cells in which  
257 SMARCAD1 was depleted transiently with siRNA. The transient knock down of SMARCAD1  
258 resulted in similar fork progression defects than the one observed in  $\Delta$ -SMARCAD1 and  
259 SMARCAD1<sup>-/-</sup> (Fig. 3A). This suggests that SMARCAD1 directly facilitates the progression  
260 of replication forks.

261 Since SMARCAD1 deficiency displayed significant replication defects during  
262 unperturbed replication (Fig. 3A and fig. S1I), we wondered if SMARCAD1 also plays a role  
263 in the progression after fork stalling. To assess the overall rate of DNA synthesis upon  
264 replication stress, we treated cells with 1mM HU for an hour. The replication rate after stress  
265 was measured by allowing the EdU incorporation for various time-points after release from  
266 HU and EdU intensities were measured in >3000 cells using high content microscopy. Upon



267 30 minutes of release from HU we observed a mild reduction in EdU incorporation in  $\Delta$ -  
268 SMARCAD1 cells. However, the reduction in EdU incorporation became more evident at later  
269 time points in  $\Delta$ -SMARCAD1 cells (fig. S2C). To further verify this, we performed a fork  
270 restart assay using DNA fiber analysis. Cells were labeled with CldU followed by a mild dose  
271 of HU (1mM) treatment for an hour to stall the forks and subsequently released into IdU.  
272 Consistently, we observed significant defects in CldU track lengths representing an internal  
273 control for unperturbed forks (Fig. 3B) similar to those observed in the fork progression assay  
274 performed in Fig. 3A. However, analysis of IdU track lengths representing stressed forks  
275 revealed an even higher shortening of the track lengths in  $\Delta$ -SMARCAD1 cells suggesting a  
276 more severe defect in the progression or restart of stalled forks (Fig. 3B). Additionally, upon  
277 analysis of fork restart efficiency, we observed a significant difference between stalled versus  
278 restarted forks in  $\Delta$ -SMARCAD1 cells (25% restarted) when compared to WT cells (60%  
279 restarted) after 15 minutes of release from HU-stress whereas this difference significantly  
280 reduced after 30 minutes of release from HU (86% WT, 74%  $\Delta$ -SMARCAD1) (fig. S2D,  
281 left) but the progression of restarted fork remained severely defective in  $\Delta$ -SMARCAD1 cells  
282 (fig. S2D, right). These data suggest that forks restart in absence of SMARCAD1 with  
283 moderate delay but further shows severe defects in progression of stressed forks. Thus,  
284 SMARCAD1 mediates both, the efficient restart as well as progression of replication forks,  
285 which also supports the finding that cells lacking SMARCAD1 are sensitive to replication  
286 stress inducing agents.

287

### 288 **SMARCAD1 prevents accumulation of under-replicated regions and consequent genome** 289 **instability**

290 To investigate whether the delayed restart and poor fork progression upon release from HU  
291 stress results in increased single-stranded DNA (ssDNA) levels in the  $\Delta$ -SMARCAD1 cells,  
292 we analyzed RPA32, a surrogate for ssDNA, by chromatin fractionation. Upon HU treatment,  
293 the RPA32 signals were markedly enhanced in WT cells (fig. S2E). Interestingly, untreated  
294  $\Delta$ -SMARCAD1 cells showed a marked increase in chromatin associated RPA32 compared  
295 to untreated WT cells, suggesting that the accumulation of under-replicated regions in the  
296 genome could be due to defects in normal fork progression (Fig. 3A and fig. S2E). However,  
297 a significant increase in RPA32 levels could be seen upon HU treatment as well as upon release  
298 from HU-mediated block in  $\Delta$ -SMARCAD1 cells, suggesting that loss of SMARCAD1 at  
299 forks causes significant accumulation of under-replicated regions (fig. S2E).

300 DNA replication stress, exogenous or endogenous, results in reversal of forks (32-35),  
301 we hypothesized that slower fork progression and accumulation of RPA in  $\Delta$ -SMARCAD1  
302 mutants in unperturbed conditions could be a result of frequent fork stalling that stabilizes into  
303 reversed forks. To test this hypothesis, we visualized replication intermediates formed *in vivo*  
304 using electron microscopy (EM) (36) in WT and  $\Delta$ -SMARCAD1 mutant cells. Interestingly,  
305 we observed a higher frequency of reversed forks in  $\Delta$ -SMARCAD1 than in WT cells,  
306 suggesting frequent stalling as well as remodeling of forks even in unperturbed conditions (Fig.  
307 3, C and D). Moreover, we also observed an increase in the percentage of ssDNA gaps  
308 accumulated in daughter strands behind the fork of  $\Delta$ -SMARCAD1 cells relative to WT,  
309 which further enhanced dramatically upon release from HU mediated stress (Fig. 3E and F).  
310 We also quantified the length of ssDNA at the fork that determines nascent strand processing  
311 activity at the fork, which showed no significant difference in  $\Delta$ -SMARCAD1 than compared  
312 to WT (fig. S2F). Together, these data further corroborate that the role of SMARCAD1 is  
313 critical in limiting fork stalling under unperturbed conditions and promoting efficient fork  
314 restart as well as fork progression globally upon replication stress.

315 We further investigated whether the increased accumulation of ssDNA upon replication  
316 stress leads to an increase in DSBs that would contribute to genome instability. To evaluate the  
317 accumulation of DNA damage, we performed pulsed-field gel electrophoresis (PFGE) to  
318 measure the physical presence of DSBs. There was no obvious increase in the level of DSBs  
319 upon the stalling of forks induced by HU treatment in either WT and  $\Delta$ -SMARCAD1 cells,  
320 suggesting that forks stalled for 3-hours with HU treatment do not immediately collapse and  
321 convert into DSBs. This data was further supported by the efficient loading of RAD51 observed  
322 at stalled forks induced upon HU treatment in  $\Delta$ -SMARCAD1 similar to WT (fig. S2G).  
323 However, after release from replication stress for 16-hours, a marked increase in the signal of  
324 broken DNA fragments can be observed in  $\Delta$ -SMARCAD1 cells in comparison to WT cells  
325 (Fig. 3G). Together, these data suggest a role of SMARCAD1 at replication forks that is crucial  
326 to maintain genome integrity upon replicative stress.

327

### 328 **SMARCAD1 maintains PCNA levels at replication forks, especially upon fork restart**

329 Since  $\Delta$ -SMARCAD1 lacks interaction with PCNA (Fig. 1F and fig. S1H) and  $\Delta$ -  
330 SMARCAD1 cells show defects in fork progression (Fig. 3, A and B), we wondered if the loss  
331 of SMARCAD1 at replication fork affects the PCNA clamp that acts as processivity factor for  
332 efficient DNA synthesis. We, therefore, measured the chromatin bound PCNA levels in

333 replicating cells labelled with EdU to observe the dynamics of PCNA localization during DNA  
334 synthesis. QIBC analysis showed significant reduction in chromatin bound PCNA levels in  
335 replicating cells of  $\Delta$ -SMARCAD1 in comparison to WT (Fig. 4A), whereas the total levels  
336 of PCNA protein were not affected (Fig. 4B). This data suggests that absence of SMARCAD1  
337 at forks affect PCNA levels at the forks. A similar reduction in PCNA levels at replication sites  
338 was observed in SMARCAD1<sup>-/-</sup> cells suggesting  $\Delta$ -SMARCAD1 behaves similar to complete  
339 loss of SMARCAD1 protein and that  $\Delta$ -SMARCAD1 does not display a dominant negative  
340 phenotype (fig. S3A). We further monitored the impact of HU-mediated replication stress on  
341 PCNA recovery. Since PCNA dissociates from HU-mediated stalled forks (8) (Fig. 1, A and  
342 B), we hypothesized that aggravated defects in fork restart in  $\Delta$ -SMARCAD1 were due to  
343 poor recovery of PCNA at the forks upon release from HU. Using QIBC analysis, we  
344 simultaneously assessed the EdU incorporation and PCNA recovery upon HU stress using an  
345 average of 3000 cells per condition (Fig. 4C). WT replicating cells showed significantly  
346 reduced PCNA levels upon 1mM HU treatment for an hour and had recovered to their untreated  
347 levels by 45 minutes of release from HU stress (Fig. 4C and fig. S3B). Consistently, we  
348 observed reduced PCNA levels as well as reduced EdU incorporation in  $\Delta$ -SMARCAD1 cells  
349 in comparison to WT cells under the untreated condition. Interestingly,  $\Delta$ -SMARCAD1 cells  
350 showed severe defects in recovery of PCNA levels as well as reduced EdU incorporation upon  
351 release from HU-mediated replicative stress (Fig. 4C, and fig. S3, B and C). The significantly  
352 reduced EdU incorporation is consistent with the results of the DNA fiber assay of fork restart  
353 upon HU stress which revealed severe defects in the progression of restarted forks in  $\Delta$ -  
354 SMARCAD1 cells (Fig. 3B). This data suggests that SMARCAD1 participates in the  
355 maintenance of PCNA levels at the unperturbed forks. Moreover, under stressed conditions the  
356 absence of SMARCAD1 results in poor recovery of PCNA at restarting stalled forks, which  
357 subsequently causes inefficient fork restart and severe defects in fork progression upon  
358 replication stress.

359 We further determined the dynamics of PCNA in replicating WT and  $\Delta$ -SMARCAD1  
360 cells using an inverse Fluorescence Recovery After Photobleaching (iFRAP) live-cell imaging  
361 assay. iFRAP is an adapted FRAP approach optimized to analyze differences of dissociation  
362 rates ( $K_{off}$ ) and involves continuous bleaching to quench the total nuclear fluorescence of a  
363 GFP-tagged protein with the exception of a small predefined area. Using this approach, we  
364 could determine the residence time of GFP-PCNA at replication foci (unbleached area) as a  
365 direct read out of its turnover (fig. S3D). We performed iFRAP on GFP-tagged PCNA

366 expressed from its endogenous allele in both WT and  $\Delta$ -SMARCAD1, cell types (fig. S1G).  
367 Remarkably, we observed nearly 2-fold shorter residence times for GFP-tagged PCNA foci  
368 in  $\Delta$ -SMARCAD1 cells compared to WT cells (Fig. 4D and fig. S3D). This data clearly  
369 suggests that the turnover of PCNA at replication forks is severely increased in the absence of  
370 SMARCAD1 at the forks, which may be caused by either a defect in the loading or unloading  
371 of PCNA in the absence of SMARCAD1 at the replication forks.

372 To further test this hypothesis, we performed chromatin fractionation to observe the  
373 chromatin-associated fraction of subunits of the PCNA loader, RFC (RFC1/RFC2-5) and of  
374 the unloader, RLC (ATAD5/RFC2-5) complex subunits (15, 37). We observed no obvious  
375 change in the level of RFC1, a major subunit of the RFC complex, in either cell type with or  
376 without HU treatment (Fig. 4E). Interestingly, the chromatin association of RFC4, a subunit  
377 shared between the RFC and RLC complexes, as well as that of ATAD5, a major subunit of  
378 the RLC complex, were found to be significantly enhanced in chromatin bound fraction of  $\Delta$ -  
379 SMARCAD1 cells, while the total level of these proteins in whole cell extracts remains similar  
380 to WT (Fig. 4E). This finding suggests that the increased chromatin binding of the PCNA-  
381 unloader ATAD5-RLC causes the increased release of PCNA in the absence of SMARCAD1.  
382 To further rule out the possibility of deregulated mRNA expression of ATAD5-RLC complex  
383 in SMARCAD1 mutants, we compared the transcriptome analysis data showing similar level  
384 of PCNA, ATAD5, RFC1 and all the other RFC subunits (RFC2-5) that are shared between  
385 loading and unloading complexes (fig. S3E). Based on this observation, we next tested whether  
386 depleting ATAD5 levels might restore normal PCNA chromatin association and reduce  
387 replication defects in  $\Delta$ -SMARCAD1 cells. Consistent with previous reports (38), we  
388 observed enhanced PCNA levels at replicating sites in WT cells upon ATAD5 knockdown  
389 using high content microscopy (Fig. 4F and fig. S3F). Importantly, ATAD5 knockdown  
390 rescued PCNA levels at replication sites in  $\Delta$ -SMARCAD1 cells, similar to WT levels (Fig.  
391 4F and fig. S3F). We further confirmed these observations using iFRAP and detected an  
392 increased retention time of PCNA in both WT and  $\Delta$ -SMARCAD1 cells (Fig. 4G). However,  
393 as previously reported (38), loss of ATAD5 significantly reduced the overall EdU  
394 incorporation in WT cells and a similar decrease was observed in  $\Delta$ -SMARCAD1 cells,  
395 suggesting that the enhanced accumulation of PCNA at forks also affects overall DNA  
396 synthesis (fig. S3G). Furthermore, the ATAD5 knockdown did not rescue the cellular  
397 sensitivity of  $\Delta$ -SMARCAD1 cells to cisplatin and olaparib (fig. S3H).

398

## 399 **Loss of 53BP1 restores PCNA stability, fork restart and drug tolerance in $\Delta$ -** 400 **SMARCAD1 cells**

401 Having established the role of SMARCAD1 at the replication forks, we further investigated  
402 the mechanism of how SMARCAD1 promotes replication fork progression. Earlier studies  
403 have shown a role for SMARCAD1 in displacing 53BP1 from the site of DSBs to promote HR  
404 repair (23). Moreover, SMARCAD1 and 53BP1 show contrasting enrichments at unperturbed  
405 versus stalled replication forks, shown by iPOND-SILAC-Mass Spectrometry (8) (Fig. 1A and  
406 Table S1). We further validated the enrichments of 53BP1 at stalled forks versus restarted forks  
407 using fluorescence microscopy in WT cells (Fig. 5A). The data clearly showed 53BP1  
408 colocalization with EdU mainly upon HU treatment suggesting its enrichment at stalled forks  
409 in WT cells, whereas upon release from HU stress, the EdU labelled sites representing restarted  
410 forks show clear displacement between 53BP1 and EdU foci (Fig. 5A). We hypothesized that,  
411 similar to DSBs (23), SMARCAD1 might prevent 53BP1 to accumulate at active or restarted  
412 replication forks by promoting its displacement from the stalled forks. To test this hypothesis,  
413 we measured the levels of 53BP1 protein in replicating cells (EdU positive) of  $\Delta$ -  
414 SMARCAD1 compared to WT, in untreated as well as in cells released from HU-stress. We  
415 observed a mild but significant increase in 53BP1 levels in replicating cells of  $\Delta$ -  
416 SMARCAD1 and strikingly, a significantly higher accumulation of 53BP1 levels could be seen  
417 in cells released from HU-stress (fig. S4A). We further measured the localization of 53BP1  
418 protein relative to EdU marked replication sites in  $\Delta$ -SMARCAD1 compared to WT cells.  
419 Upon HU block, a significant percentage of replicating WT cells showed an overlap between  
420 EdU and 53BP1 foci, which significantly reduced upon release from HU stress (Fig. 5B).  
421 Whereas significantly higher percentage of  $\Delta$ -SMARCAD1 cells showed colocalization of  
422 EdU and 53BP1 foci in HU block cells, which remained remarkably higher even upon release  
423 from HU stress (Fig. 5B). Supporting this observation, the Pearson's overlap co-efficient as  
424 well as Manders' (M1/M2) overlap co-efficients estimating the significance of overlap between  
425 EdU and 53BP1 foci were found to be significantly higher in  $\Delta$ -SMARCAD1 than in WT  
426 (fig. S4B). Together these data suggest that SMARCAD1 is required to displace 53BP1 from  
427 stalled replication forks possibly to allow their restart.

428 This observation led us to hypothesize that loss of 53BP1 may allow the normal  
429 progression of forks in  $\Delta$ -SMARCAD1 cells, which shows frequent fork stalling even in  
430 unperturbed conditions (Fig. 3C). We, therefore, first investigated the progression rate of  
431 unperturbed forks using si53BP1 in  $\Delta$ -SMARCAD1 using a DNA fiber assay. Interestingly,

432 transient knockdown of 53BP1 completely rescued the fork progression defects of  $\Delta$ -  
433 SMARCAD1 cells (fig. S4, C and D). Additionally, we also performed fork restart assay and  
434 found that both the IdU track lengths as well as CldU track lengths, representing stressed (after  
435 HU treatment) and non-stressed forks (before HU treatment) respectively, showed complete  
436 restoration of fork progression rates in  $\Delta$ -SMARCAD1 (Fig. 5C). Consistently, we observed  
437 a rescue in accumulation of reversed forks as well as reduced accumulation of ssDNA gaps  
438 behind the fork in  $\Delta$ -SMARCAD1 cells upon 53BP1 knock down condition (Fig. 5D). As  
439 the severe defects in restart of replication forks in  $\Delta$ -SMARCAD1 was correlated with the  
440 poor recovery of PCNA, we next sought to determine, if 53BP1 knockdown would also restore  
441 PCNA levels in  $\Delta$ -SMARCAD1 cells. Consistently, QIBC plots showed that upon HU-  
442 mediated block PCNA levels were significantly reduced in replicating cells even upon 53BP1  
443 knockdown, however, importantly, QIBC plots showed a remarkable recovery of PCNA in  
444  $\Delta$ -SMARCAD1 similar to WT, when released from HU-mediated block (Fig. 5E and fig.  
445 S4E). In support to the restoration of PCNA levels, we observed a marked reduction in  
446 chromatin bound ATAD5 levels upon knockdown of 53BP1 in  $\Delta$ -SMARCAD1 (fig. S4F),  
447 suggesting that 53BP1 further promotes PCNA unloading in absence of SMARCAD1 at forks  
448 through ATAD5 activity. The potential interaction between 53BP1 and ATAD5 was further  
449 confirmed by chromatin immunoprecipitation of 53BP1 showing enhanced interaction in either  
450 HU-induced replication stress conditions in WT or under unperturbed conditions of  $\Delta$ -  
451 SMARCAD1 cells, both of which shows enhanced accumulation of stalled forks (Fig. 3C and  
452 fig. S4G). We also noticed that the higher molecular weight band of ATAD5 was mainly  
453 immunoprecipitated with 53BP1 in chromatin IPs which was further confirmed by notable  
454 reduction in signal of potentially phosphorylated ATAD5 band in cells targeted with siATAD5  
455 (fig. S4G). The phosphorylated form of ATAD5 have been reported to interact with RAD51 at  
456 stalled/regressed forks previously (39, 40). Taken together, these data suggest that 53BP1  
457 interaction with ATAD5 regulates PCNA levels at stalled forks. Since loss of 53BP1 rescued  
458 genome instability, as monitored by reduction of accumulated ssDNA gaps in  $\Delta$ -  
459 SMARCAD1 (Fig. 5D), we next determined if 53BP1 knockdown rescues the sensitivity of  
460  $\Delta$ -SMARCAD1 cells towards replication poisons. Interestingly, we observed a significant  
461 restoration of resistance towards cisplatin and olaparib treatment after depletion of 53BP1 in  
462  $\Delta$ -SMARCAD1 cells (Fig. 5F). Together, these data imply that SMARCAD1 maintains fine  
463 PCNA levels by suppressing unscheduled 53BP1 accumulation at the active replication forks  
464 and thereby maintain genome stability and replication stress tolerance in the cells.

465 From this data, we further hypothesized that enzymatic activity of SMARCAD1 is  
466 required to displace 53BP1-associated nucleosomes to suppress the accumulation of 53BP1 at  
467 replication forks, in order to promote efficient fork restart and progression. To investigate this,  
468 we generated knock-Ins of cDNA-SMARCAD1 that were either wildtype or contained an  
469 ATPase-disabling K528R mutation (23). As expected, we observed a rescue in fork progression  
470 defects in  $\Delta$ -SMARCAD1 cells when corrected with fully functional SMARCAD1 but not  
471 with ATPase-dead K528R SMARCAD1 (fig. S4H). Moreover, ATPase-dead SMARCAD1  
472 showed significant defects in fork progression when it replaced wildtype SMARCAD1 in WT  
473 cells (fig. S4H), suggesting that the ATPase chromatin remodeling activity of SMARCAD1 is  
474 essential to maintain fork stability.

475

#### 476 **SMARCAD1-mediated active fork stability confers survival in BRCA1 mutated tumors,** 477 **irrespective to their HR- status**

478 Our data implies that SMARCAD1-mediated replication fork stability contributes to genome  
479 stability in a manner independent of its role in HR repair of DSBs. Similarly, HR-independent  
480 roles in the protection of stalled forks during replication stress have been uncovered for BRCA1  
481 and BRCA2 (2, 3, 5-7). To further test if SMARCAD1 also protects stalled forks, similar to  
482 BRCA1, we observed for fork degradation using DNA fiber assay. The data clearly shows that  
483 loss of BRCA1 leads to stalled fork degradation even upon 3h exposure to 4mM HU, while  
484  $\Delta$ -SMARCAD1 shows no significant defects in fork protection and is similar to WT (Fig.  
485 6A). Furthermore, as shown previously longer exposure of cells to 4mM HU (up to 8hr) leads  
486 to a moderate but significant processing of forks in WT cells (41), we observed similar effects  
487 in  $\Delta$ -SMARCAD1 while loss of BRCA1 led to severe fork degradation (Fig. 6A). Further,  
488 this data also suggests that SMARCAD1 is not defective in processing of stalled forks, as  
489 proposed for its fission yeast homolog (42), otherwise the moderate but significant degradation  
490 observed in 8hours similar to WT level would not be expected due to defective processing of  
491 nascent strands. Thus, these data along with fork progression data (Fig. 3, A and B) taken  
492 together suggest that replication defects observed in absence of SMARCAD1 is due to  
493 defective active replication fork stability and not due to defective stalled fork protection or fork  
494 processing activities. Furthermore, in the absence of SMARCAD1, unperturbed cells showed  
495 frequent stalling of replication forks without subsequent accumulation of DSBs (Fig. 3, C and  
496 G), this could possibly be due to BRCA-mediated fork protection in SMARCAD1 mutant cells.  
497 To test this hypothesis, we knocked down BRCA1 transiently from MRC5 WT,  $\Delta$ -

498 SMARCAD1 and SMARCAD1<sup>-/-</sup> cells to analyze replication fork dynamics. As previously  
499 reported, siBRCA1 in WT cells showed no significant defects in progression rate of  
500 unperturbed forks (2). However, in NΔ-SMARCAD1 and SMARCAD1<sup>-/-</sup> cells, loss of BRCA1  
501 resulted in significantly shorter track length (fig. S5A), which could not be rescued by loss of  
502 53BP1 (fig. S5B). These data suggest that upon loss of SMARCAD1, BRCA1 is required to  
503 maintain progression of forks, possibly by protecting stalled forks from DNA nuclease  
504 mediated degradation to allow their restart. To test if indeed loss of BRCA1 in SMARCAD1  
505 mutants lead to increased DNA damage, we performed QIBC analysis for γH2AX, and  
506 observed a significantly enhanced accumulation of DNA damage upon BRCA1 knockdown in  
507 both NΔ-SMARCAD1 as well as SMARCAD1<sup>-/-</sup> mutants compared to single mutants or  
508 wildtype cells (Fig. 6B), suggesting BRCA1 could be required to protect stalled forks from  
509 degradation to prevent DNA damage accumulation.

510 As previously reported, BRCA1 protects stalled forks from degradation mediated by DNA  
511 nuclease Mre11 (7). Therefore, to test out this hypothesis, we treated cells with inhibitor of  
512 DNA nuclease Mre11, Mirin and monitored the fork progression using DNA fiber assay.  
513 Strikingly, Mirin treatment completely rescues the severe fork progression defects observed  
514 upon loss of BRCA1 in SMARCAD1 mutant (Fig. 6C). This data suggests that indeed stalled  
515 forks in absence of SMARCAD1 required BRCA1 protection to allow fork progression and  
516 maintain genome integrity.

517 Previously, SMARCAD1 was reported to play a critical role in the metastasis of triple-  
518 negative breast cancer (43, 44). To test whether differential levels of SMARCAD1 expression  
519 could be an indicator of patient responses to replication stress inducing platinum  
520 chemotherapy, we analyzed the high grade serous ovarian cancer (HGSOC) patients for their  
521 correlation between BRCA1 and SMARCAD1 expression levels to their response to  
522 chemotherapy. Interestingly, survival analysis demonstrated that platinum-treated BRCA1-low  
523 patients, but not BRCA1-high patients, with low SMARCAD1 expression were correlated with  
524 a longer progression-free survival (PFS) while higher expression of SMARCAD1 correlated  
525 with poor response to chemotherapy (fig. S5C). This data suggests that SMARCAD1 levels  
526 could be a biomarker for acquired resistance to platinum-based chemotherapy in BRCA1-  
527 low/deficient ovarian cancers.

528 To further verify this experimentally, we queried if SMARCAD1 is required for fork  
529 progression in BRCA1-deficient tumor cells and whether its loss could hypersensitize HR-  
530 deficient BRCA1<sup>-/-</sup> mouse breast tumor cells generated using *K14Cre;Brca1<sup>F/F</sup>; p53<sup>F/F</sup>* (KB1P)



531 mouse mammary tumor models (45). We generated shRNA-mediated knockdowns of  
532 SMARCAD1 in *Brcal*<sup>-/-</sup> *P53*<sup>-/-</sup> defective mouse breast tumor derived cell lines (fig. S5D).  
533 Surprisingly, the loss of SMARCAD1 resulted in a significant reduction in colony formation  
534 in HR-defective BRCA1<sup>-/-</sup> (KB1P-G3; PARPi naïve) (46) tumor cells but not in KB1P-G3  
535 tumor cells that were reconstituted with human BRCA1 (KB1P-G3-B1) and proficient in HR  
536 (47), suggesting that loss of SMARCAD1 causes synthetic lethality in BRCA1-deficient tumor  
537 cells (Fig. 6D). These data indicate a potential role of SMARCAD1 in maintaining active fork  
538 stability, which may be the reason for the survival of BRCA1-deficient HR-defective tumor  
539 cells. Furthermore, we also tested whether BRCA1 and 53BP1 double- knockout tumor cells  
540 which are proficient for HR and resistant to PARPi treatments (KB1P-177.a5; PARPi resistant)  
541 (46), require SMARCAD1 for proliferation. Interestingly, a SMARCAD1 knockdown again  
542 resulted in lethality in these cells, suggesting that SMARCAD1's role is essential for  
543 proliferation of BRCA defective tumor cells, irrespective of their HR status (Fig. 6D).  
544 Furthermore, 53BP1 deficiency in BRCA1-defective genetic background could not rescue  
545 defects of SMARCAD1 knockdown, which suggests that fork protection mediated by BRCA1  
546 becomes critical for cellular survival in the absence of SMARCAD1, similar to what we  
547 observed in human fibroblast cells (fig. S5, A and B). Additionally, we tested the effect of  
548 SMARCAD1 knockdown on KB1P -derived, PARPi- naïve (KB1P4.N) and PARPi- resistant  
549 (KB1P4.R), tumor organoids grown in ex vivo cultures (48). Consistent with our results in  
550 KB1P tumor cell lines, we observed a synthetic lethality in the 3D- tumor organoids, suggesting  
551 that SMARCAD1 is essential for the survival of BRCA1- mutated tumors (Fig. 6E). These data  
552 strongly suggest a conserved and non-epistatic role of SMARCAD1 and BRCA1 at replication  
553 forks.

554 BRCA1- deficient cells show reduced fork protection and high levels of endogenous  
555 stress (7, 49), we speculated that the loss of SMARCAD1 further enhances replication stress  
556 due to defective progression of forks causing proliferation defects. To test this speculation, we  
557 used siRNA to transiently deplete SMARCAD1 protein (50) in KB1P 2D-tumor derived cell  
558 lines (fig. S5E) to monitor individual fork progression using DNA fiber assay. We sequentially  
559 labeled human BRCA1-reconstituted, KB1P-G3B1 cells as control, KB1P-G3 (HR deficient)  
560 and KB1P-177.a5 (chemoresistant; HR proficient) with CldU (red) and IdU (green), followed  
561 by track length analysis. In support to the survival assays, even though sub-lethal SMARCAD1  
562 knock-down affects only mildly the cell cycle of all 3 cell lines (fig. S5F), it led to a  
563 significantly shorter track lengths of both CldU and IdU in both KB1P-G3 and KB1P-177 cells  
564 in comparison to BRCA1 reconstituted KB1P-G3B1 cells, suggesting an essential role of

565 SMARCAD1 in mediating fork progression in absence of BRCA1 (Fig. 6F). Together, these  
566 results strongly suggest that the SMARCAD1-mediated stability of active replication forks is  
567 a physiologically important process for cellular proliferation of BRCA1- deficient tumors,  
568 irrespective of their HR-status (fig. S6).

569

## 570 **DISCUSSION**

571 Our study has revealed a novel mechanism of active fork stability that has important  
572 implications in the survival of tumor cells.

573

### 574 **A genetically distinct role of SMARCAD1 at active replication forks, from HR**

575 As opposed to the commonly attributed role of DNA repair factors in replication fork protection  
576 (6, 7, 9, 51), here we show a newly recognized function of SMARCAD1 in maintaining the  
577 stability of active (unperturbed and restarted) replication forks while its absence do not disturb  
578 stalled fork protection and fork processing activities (Fig. 3, A-B and Fig. 6A and fig. S2F).  
579 Importantly, using a separation-of-function SMARCAD1 mutant (N $\Delta$ -SMARCAD1), we show  
580 that SMARCAD1's role in stabilization of active replication forks is genetically separable from  
581 its role in HR repair, and is critical in maintaining genome stability especially upon replication  
582 stress. The physical interaction between SMARCAD1 and PCNA, established using in vitro  
583 and in vivo assays (24), was suggested to be responsible for SMARCAD1's association with  
584 replication machinery (24, 26). Our biochemical and immunofluorescence assays further  
585 confirm that the N $\Delta$ -SMARCAD1 protein, lacking initial 137 amino acids, can bind to  
586 chromatin, but lacks the ability to interact with PCNA. This finding is consistent with the lack  
587 of association between N $\Delta$ -SMARCAD1 and replication forks as previously suggested (26).  
588 However, other components may also be involved in promoting SMARCAD1's association  
589 with replication machinery, such as phosphorylation of SMARCAD1 by Cyclin- dependent  
590 kinase (CDK). Indeed a CDK phosphorylation site at the N-terminus of SMARCAD1 is among  
591 the 137 amino acids that are missing in the N $\Delta$ -SMARCAD1 protein (52). Nonetheless, the  
592 CUE-dependent protein-protein interactions and ATPase- dependent chromatin remodeling  
593 activity, in the context of HR repair and nuclear association, seems to remain functional in the  
594 N $\Delta$ -SMARCAD1 protein. Notably, cells with a SMARCAD1-null (SMARCAD1<sup>-/-</sup>) genotype  
595 and those expressing the N $\Delta$ -SMARCAD1 allele, show similar defects in fork progression and  
596 in sensitivity towards replication poisons, arguing that the role of SMARCAD1 at replication  
597 forks is crucial in mediating resistance to replication stress-inducing drugs.

598 Furthermore, our data showed evidence of frequent accumulation of stalled forks as  
599 well as ssDNA gaps behind the replication forks in  $\Delta$ -SMARCAD1 cells. The accumulation  
600 of ssDNA and stalled forks could be indicative of hindered replication fork progression through  
601 certain difficult-to-replicate regions, such as highly transcribing regions or repetitive regions  
602 of the genome (53). Alternatively, ssDNA accumulation could also be resultant of the re-  
603 priming events by PRIMPOL at stalled forks that in the process of re-initiating the DNA  
604 synthesis leads to accumulation of ssDNA gaps (54, 55). Interestingly, however in BRCA1-  
605 challenged cells, PRIMPOL activity was shown to be responsible for DNA synthesis upon  
606 replicative stress condition. Here, our study shows a unique pathway of active fork stabilization  
607 mediated by SMARCAD1 which is critical for fork progression in BRCA1-deficient cells even  
608 under unperturbed conditions. This implies that SMARCAD1 mediated active replication fork  
609 stability is a central and a separate pathway for stabilization of replication forks than from  
610 recently described PRIMPOL mediated fork re-priming or well-established BRCA1-mediated  
611 fork protection pathway (56).

612

### 613 **SMARCAD1 regulates PCNA levels at active replication forks**

614 Our findings suggest a hitherto unrecognized role for SMARCAD1 in maintaining the  
615 fine control of PCNA levels at the forks. In this study, along with previously published study  
616 (24, 26), we have strong evidence of positive interaction between SMARCAD1 and PCNA  
617 which is also responsible for SMARCAD1 association with replication machinery. A global  
618 reduction in chromatin bound PCNA levels at the fork and a faster dissociation rate of PCNA  
619 foci in  $\Delta$ -SMARCAD1 cells, further suggests a mutualistic interaction between SMARCAD1  
620 and PCNA at the replication forks (Fig.4, C-D). Consistently, an increase of PCNA unloading  
621 by the ATAD5-RLC complex was observed in  $\Delta$ -SMARCAD1 cells. A recent report  
622 demonstrated a critical role of ATAD5 in the removal of PCNA from stalled forks to promote  
623 recruitment of fork protection factors (39). Consistent with this report, we observed reduced  
624 PCNA levels at replication forks, accompanied by an increased accumulation of ATAD5-RLC  
625 complex, and increased frequency of reversed forks (protected stalled forks) in unperturbed  
626  $\Delta$ -SMARCAD1 cells. Furthermore, a significant number of peptides arising from RFC2-5  
627 protein subunits that are shared between PCNA loading (RFC) and unloading (ATAD5-RLC)  
628 complexes, were obtained from SMARCAD1 co-immunopurification (24). This data may  
629 indicate the direct involvement of SMARCAD1 in regulating loading/unloading activity of  
630 PCNA at replication forks. However, an interesting finding from our study is that loss of 53BP1

631 results in a significant restoration of PCNA levels in  $\Delta$ -SMARCAD1 cells accompanied with  
632 a significant reduction in ATAD5 levels at replication forks. Furthermore, the enhanced  
633 interaction between 53BP1 and post-translationally modified ATAD5 in HU treated wildtype  
634 cells or in unperturbed  $\Delta$ -SMARCAD1 cells seems to be regulating PCNA unloading from  
635 the forks. Whether the post-translation modification of ATAD5 are solely ATR-mediated or  
636 additional mechanisms play role in its regulation as suggested previously (39) could distinguish  
637 between the physiological role of ATAD5 in regulating PCNA dynamics that involves  
638 continuous loading/unloading events during normal fork progression versus the persistent  
639 unloading of PCNA from stalled forks.

640

#### 641 **SMARCAD1 prevents 53BP1 accumulation to mediate tolerance to replication stress**

642 Our study shows an unforeseen role of SMARCAD1 in preventing 53BP1 accumulation at  
643 active restarted replication forks. SMARCAD1 has been shown to displace 53BP1 from DSBs  
644 possibly by the displacing of the H2A-Ub nucleosomes with which 53BP1 associates (23). This  
645 observation is consistent with the finding that SMARCAD1 homologs in yeast perform  
646 nucleosome sliding and promote H2A-H2B dimer exchange in vitro, also regulating histone  
647 turnover in replicating cells of fission yeast cells (57-59). Consistent with these observations,  
648 it has been shown that the loss of SMARCAD1 results in a prolonged enrichment of 53BP1 at  
649 DSBs (23, 29). Strikingly, we found increased 53BP1 in association with restarted forks in  $\Delta$ -  
650 SMARCAD1 cells. Intriguingly, SMARCAD1 and 53BP1 also show contrasting enrichments  
651 at stalled versus unperturbed forks suggesting that their co-existence is possibly also prohibited  
652 by remodeling activity of SMARCAD1 at replication forks in a manner similar to that of their  
653 interaction at DSBs (8) (Fig. 1, A, C and Fig. 5A). Consistently, the knockdown of 53BP1 or  
654 the introduction of fully- functional SMARCAD1 but not the ATPase-dead SMARCAD1,  
655 results in the resumption of normal progression rates in  $\Delta$ -SMARCAD1 cells. This data  
656 implies that both the ability of SMARCAD1 to localize to forks and its chromatin remodeling  
657 activity are required to prevent 53BP1 accumulation on active forks. As shown previously, the  
658 ATR-mediated phosphorylation of ATAD5, upon HU induced stalled fork accumulation,  
659 interacts with proteins at reversed forks proteins (39). We suggest that in the absence of  
660 SMARCAD1, enhanced ATAD5-RLC levels causing PCNA dissociation from forks leads to  
661 frequent fork stalling and consequently accumulation of reversed forks. 53BP1 binding to  
662 stalled /reversed forks further stabilize ATAD5 via their direct interaction which leads to  
663 increased PCNA unloading. Upon HU induced fork stalling, the  $\Delta$ -SMARCAD1 cells show

664 consistent accumulation of 53BP1-ATAD5 with forks even upon release from HU that  
665 further leads to poor PCNA recovery causing delayed fork restart and defective fork  
666 progression. The enzymatic activity of SMARCAD1 could be required to displace or  
667 reposition 53BP1-bound nucleosomes at regressed arm of reversed forks, similar to  
668 previously reported at DSBs (23), as the ATPase-dead mutant of SMARCAD1 shows  
669 defect in fork progression and restart efficiency similar to  $\Delta$ -SMARCAD1. Furthermore,  
670 previously it was suggested that the loss of 53BP1 restores HR in SMARCAD1-depleted  
671 cells which is responsible for developing resistance to replicative stress-inducing drugs  
672 (23). However, with this study using separation-of-function SMARCAD1 mutant, which is  
673 HR proficient but defective for fork stability, shows that the extent of damage generated upon  
674 replication stress is rather responsible for the cellular sensitivity and is not because of  
675 unrepaired DSBs due to lack of HR. This further suggests that the role of SMARCAD1 at  
676 forks is crucial for tolerance to replication stress inducing agents. We have, therefore,  
677 revealed a moonlighting function of SMARCAD1 at the replication forks in displacing 53BP1  
678 to maintain replication fork progression and genome stability. Other NHEJ factors such as  
679 RIF1, PTIP etc. have also been found in association with replication forks. Therefore, it  
680 would be interesting to investigate if 53BP1 works in complex with NHEJ machinery or  
681 have a separate role in association with ATAD5-RLC complex to regulate PCNA  
682 homeostasis and thereby fork dynamics.

683

#### 684 **An essential role of SMARCAD1 in the viability of BRCA1- defective tumors**

685 BRCA1/2 factors, independent of their role in HR, protect replication forks and  
686 prevent their collapse into genome-destabilizing DSBs (6, 7). SMARCAD1 has been  
687 shown to be epistatic with BRCA1 in the context of HR, (23, 29). However, here, we  
688 show contrasting differences in role of SMARCAD1 than that of BRCA1 by a)  
689 differential enrichment of SMARCAD1 and BRCA1 at the replication forks, where  
690 SMARCAD1 preferentially associates with active forks while BRCA1 with stalled forks  
691 (Fig. 1A) (8), b) stalled forks induced by 4mM HU in absence of SMARCAD1 are not  
692 degraded unlike upon loss of BRCA1, c) loss of SMARCAD1 but not BRCA1 causes  
693 defects in unperturbed replication fork progression (Fig. 3A and fig. S5A) (2) and finally, d)  
694 loss of 53BP1 in BRCA1 deficient cells that restores HR repair capacity, do not rescue  
695 sensitivity of BRCA1 mutants to Cisplatin treatment (Fig. 5F) (60). However, loss of  
696 53BP1 in SMARCAD1 mutant rescues Cisplatin sensitivity, suggesting replication stress  
sensitivity is uncoupled from HR repair and that SMARCAD1's role at active replication  
forks is distinct from that of BRCA1's role at stalled

697 replication forks to maintain tolerance towards replication stress inducing agents. Together  
698 these data suggest distinct role of SMARCAD1 and BRCA1 at replication forks acting in two  
699 independent pathways, where SMARCAD1 mediates active fork stability while BRCA1  
700 mediates stalled fork protection. However, both the pathways are interdependent for  
701 maintaining replication fork integrity, which is also conserved across species, from mouse to  
702 human (Fig. 6, C and F). Moreover, loss of SMARCAD1 results in enhanced accumulation of  
703 DNA damage and ultimately, synthetic lethality in mouse- BRCA1- defective tumors  
704 irrespective of their HR status. These findings suggest that these factors may work in parallel  
705 to stabilize replication forks and act synergistically to maintain fork integrity. Intriguingly, loss  
706 of Mre11 but not 53BP1 rescued fork progression defects that appeared upon loss of both  
707 BRCA1 and SMARCAD1 together in cells. This data imply that BRCA1-mediated  
708 stabilization of stalled forks allows the enrichment of 53BP1, which further delays fork restart  
709 in absence of SMARCAD1. Similarly, loss of SMARCAD1 in BRCA1 deficient mouse tumor  
710 organoids could result in Mre11-mediated fork degradation, as observed for human fibroblast  
711 cells, which subsequently result in massive accumulation of unrepaired DSBs in genomes,  
712 causing synthetic lethality.

713 In summary, we have shown a conserved interplay between SMARCAD1 and BRCA1  
714 in stabilization of replication forks, where SMARCAD1 stabilizes active forks while BRCA1  
715 protects stalled forks to maintain genome integrity (fig. S6). Notably, SMARCAD1 mediated  
716 stabilization of unperturbed forks promotes cellular proliferation in BRCA1-deficient mouse  
717 breast tumor, cells and organoids, independently of their HR- and PARPi- resistance status.  
718 Similarly, the correlation of reduced chances of survival after chemotherapy in cancer patients  
719 with enhanced expression of SMARCAD1 along with reduced expression of BRCA1, suggest  
720 that stabilization of active forks promotes tolerance towards chemotherapy in BRCA1-  
721 defective tumors. Finally, the observation that SMARCAD1 become essential for genome  
722 stability and cellular survival in the absence of BRCA1, suggest that targeting the stability of  
723 active replication forks has the potential to be a clinically effective remedy for BRCA-deficient  
724 tumors, naïve or chemoresistant. It also suggests that SMARCAD1 could be a strong candidate  
725 for development of novel therapeutic treatment for BRCA1-deficient cancer patients.

## 726 **AUTHOR CONTRIBUTIONS**

727 C.S.Y.L. conducted all the QIBC, FACS, and PFGE experiments. M.v.T performed iFRAP,  
728 chromatin fractionation experiments and with help from Y.Z performed crosslinked chromatin  
729 IP experiments. V.G. performed all the fiber experiments and IF experiments related to  
730 ATAD5. M.P.D. performed all the cloning experiments and clonogenic assays using mouse

731 tumor cells/organoids under the supervision of J.J. Y.Z. with the help of M.v.d.D. performed  
732 cloning experiments of cDNA-SMARCAD1. E.M.M. with help from C.S.Y.L performed  
733 clonogenic assays with MRC5 cells and chromatin fractionations for RAD51. H.L. helped  
734 C.S.Y.L, and M.v.d.D. in cloning experiments in MRC5 cells. M.v.R, W.Z. and I.S. analyzed  
735 fluorescence microscopy data. The assistance to use high-content imaging microscope facility  
736 was provided by M.v.R and P.J.F. J.D. analyzed mass-spectrometry data. J.G.S.C.S.G analyzed  
737 TCGA ovarian breast cancer data. D.W. analyzed RNA-Seq data. J.A.M supervised the iFRAP  
738 and chromatin fractionation experiments. A.R.C supervised the iPOND experiments performed  
739 by C.M and EM experiments performed by E.M.M. N.T. conceptualized the project, supervised  
740 it, and wrote the manuscript.

741

## 742 **ACKNOWLEDGMENTS**

743 We thank Roland Kanaar, Wim Vermeulen, and Claire Wyman for stimulating discussions and  
744 sharing important reagents used in the manuscript; Kyungjae Myung and Kyooyoung Lee for  
745 ATAD5 antibody and sharing technical information, Dik van Gent for 53BP1 antibody, Ewa  
746 Goggola for help with initial phase of mouse tumor cells culture. This work was supported by  
747 grants from the Daniel den Hoed Sticing Young Scientific Talent grant (DDHS#108341) to  
748 NT and the Oncode Institute partly financed by the Dutch Cancer Society funded grant (KWF  
749 grant 10506) to JAM, Erasmus MC Daniel den Hoed instrument grant to ARC and startup  
750 funds from the Erasmus MC to NT.

751

## 752 **DECLARATION OF INTERESTS**

753 The authors declare no competing interests.

754

755 **Data and materials availability: NCBI bioproject accession number: PRJNA609878**

756

## 757 **Supplementary Materials:**

758 Materials and Methods

759 Figures S1-S6

760 Tables S1-S3

761

## 762 **REFERENCES**

763

- 764 1. C. J. Lord, A. Ashworth, Mechanisms of resistance to therapies targeting BRCA-  
765 mutant cancers. *Nat Med* **19**, 1381-1388 (2013).
- 766 2. A. R. Chaudhuri *et al.*, Erratum: Replication fork stability confers chemoresistance in  
767 BRCA-deficient cells. *Nature* **539**, 456 (2016).
- 768 3. X. Ding *et al.*, Synthetic viability by BRCA2 and PARP1/ARTD1 deficiencies. *Nat*  
769 *Commun* **7**, 12425 (2016).
- 770 4. E. Gogola *et al.*, Selective Loss of PARG Restores PARylation and Counteracts PARP  
771 Inhibitor-Mediated Synthetic Lethality. *Cancer Cell* **33**, 1078-1093 e1012 (2018).
- 772 5. S. Mijic *et al.*, Replication fork reversal triggers fork degradation in BRCA2-defective  
773 cells. *Nat Commun* **8**, 859 (2017).
- 774 6. K. Schlacher *et al.*, Double-strand break repair-independent role for BRCA2 in  
775 blocking stalled replication fork degradation by MRE11. *Cell* **145**, 529-542 (2011).
- 776 7. K. Schlacher, H. Wu, M. Jasin, A distinct replication fork protection pathway connects  
777 Fanconi anemia tumor suppressors to RAD51-BRCA1/2. *Cancer Cell* **22**, 106-116  
778 (2012).
- 779 8. H. Dugrawala *et al.*, The Replication Checkpoint Prevents Two Types of Fork  
780 Collapse without Regulating Replisome Stability. *Mol Cell* **59**, 998-1010 (2015).
- 781 9. C. Mukherjee *et al.*, RIF1 promotes replication fork protection and efficient restart to  
782 maintain genome stability. *Nat Commun* **10**, 3287 (2019).
- 783 10. G. L. Moldovan, B. Pfander, S. Jentsch, PCNA, the maestro of the replication fork. *Cell*  
784 **129**, 665-679 (2007).
- 785 11. B. M. Sirbu *et al.*, Analysis of protein dynamics at active, stalled, and collapsed  
786 replication forks. *Genes Dev* **25**, 1320-1327 (2011).
- 787 12. C. Yu *et al.*, Strand-specific analysis shows protein binding at replication forks and  
788 PCNA unloading from lagging strands when forks stall. *Mol Cell* **56**, 551-563 (2014).



- 789 13. J. Majka, P. M. Burgers, The PCNA-RFC families of DNA clamps and clamp loaders.  
790 *Prog Nucleic Acid Res Mol Biol* **78**, 227-260 (2004).
- 791 14. P. Kanellis, R. Agyei, D. Durocher, Elg1 forms an alternative PCNA-interacting RFC  
792 complex required to maintain genome stability. *Curr Biol* **13**, 1583-1595 (2003).
- 793 15. M. S. Kang *et al.*, Regulation of PCNA cycling on replicating DNA by RFC and RFC-  
794 like complexes. *Nat Commun* **10**, 2420 (2019).
- 795 16. T. Kubota, Y. Katou, R. Nakato, K. Shirahige, A. D. Donaldson, Replication-Coupled  
796 PCNA Unloading by the Elg1 Complex Occurs Genome-wide and Requires Okazaki  
797 Fragment Ligation. *Cell Rep* **12**, 774-787 (2015).
- 798 17. J. Mejlvang *et al.*, New histone supply regulates replication fork speed and PCNA  
799 unloading. *J Cell Biol* **204**, 29-43 (2014).
- 800 18. K. Shibahara, B. Stillman, Replication-dependent marking of DNA by PCNA  
801 facilitates CAF-1-coupled inheritance of chromatin. *Cell* **96**, 575-585 (1999).
- 802 19. Z. Zhang, K. Shibahara, B. Stillman, PCNA connects DNA replication to epigenetic  
803 inheritance in yeast. *Nature* **408**, 221-225 (2000).
- 804 20. K. N. Choe, G. L. Moldovan, Forging Ahead through Darkness: PCNA, Still the  
805 Principal Conductor at the Replication Fork. *Mol Cell* **65**, 380-392 (2017).
- 806 21. C. Johnson, V. K. Gali, T. S. Takahashi, T. Kubota, PCNA Retention on DNA into  
807 G2/M Phase Causes Genome Instability in Cells Lacking Elg1. *Cell Rep* **16**, 684-695  
808 (2016).
- 809 22. Z. Tan *et al.*, Small-molecule targeting of proliferating cell nuclear antigen chromatin  
810 association inhibits tumor cell growth. *Mol Pharmacol* **81**, 811-819 (2012).
- 811 23. R. M. Densham *et al.*, Human BRCA1-BARD1 ubiquitin ligase activity counteracts  
812 chromatin barriers to DNA resection. *Nat Struct Mol Biol* **23**, 647-655 (2016).

- 813 24. S. P. Rowbotham *et al.*, Maintenance of silent chromatin through replication requires  
814 SWI/SNF-like chromatin remodeler SMARCAD1. *Mol Cell* **42**, 285-296 (2011).
- 815 25. H. Dungrawala *et al.*, RADX Promotes Genome Stability and Modulates  
816 Chemosensitivity by Regulating RAD51 at Replication Forks. *Mol Cell* **67**, 374-386  
817 e375 (2017).
- 818 26. J. E. Mermoud, S. P. Rowbotham, P. D. Varga-Weisz, Keeping chromatin quiet: how  
819 nucleosome remodeling restores heterochromatin after replication. *Cell Cycle* **10**, 4017-  
820 4025 (2011).
- 821 27. T. Costelloe *et al.*, The yeast Fun30 and human SMARCAD1 chromatin remodellers  
822 promote DNA end resection. *Nature* **489**, 581-584 (2012).
- 823 28. L. I. Toledo *et al.*, ATR prohibits replication catastrophe by preventing global  
824 exhaustion of RPA. *Cell* **155**, 1088-1103 (2013).
- 825 29. S. Chakraborty *et al.*, SMARCAD1 Phosphorylation and Ubiquitination Are Required  
826 for Resection during DNA Double-Strand Break Repair. *iScience* **2**, 123-135 (2018).
- 827 30. A. J. Pierce, R. D. Johnson, L. H. Thompson, M. Jasin, XRCC3 promotes homology-  
828 directed repair of DNA damage in mammalian cells. *Genes Dev* **13**, 2633-2638 (1999).
- 829 31. S. S. Lange, K. Takata, R. D. Wood, DNA polymerases and cancer. *Nat Rev Cancer*  
830 **11**, 96-110 (2011).
- 831 32. C. Follonier, J. Oehler, R. Herrador, M. Lopes, Friedreich's ataxia-associated GAA  
832 repeats induce replication-fork reversal and unusual molecular junctions. *Nat Struct*  
833 *Mol Biol* **20**, 486-494 (2013).
- 834 33. K. J. Neelsen, M. Lopes, Replication fork reversal in eukaryotes: from dead end to  
835 dynamic response. *Nat Rev Mol Cell Biol* **16**, 207-220 (2015).
- 836 34. A. Ray Chaudhuri *et al.*, Topoisomerase I poisoning results in PARP-mediated  
837 replication fork reversal. *Nat Struct Mol Biol* **19**, 417-423 (2012).

- 838 35. R. Zellweger *et al.*, Rad51-mediated replication fork reversal is a global response to  
839 genotoxic treatments in human cells. *J Cell Biol* **208**, 563-579 (2015).
- 840 36. R. Zellweger, M. Lopes, Dynamic Architecture of Eukaryotic DNA Replication Forks  
841 In Vivo, Visualized by Electron Microscopy. *Methods Mol Biol* **1672**, 261-294 (2018).
- 842 37. M. Sakato, M. O'Donnell, M. M. Hingorani, A central swivel point in the RFC clamp  
843 loader controls PCNA opening and loading on DNA. *J Mol Biol* **416**, 163-175 (2012).
- 844 38. K. Y. Lee, H. Fu, M. I. Aladjem, K. Myung, ATAD5 regulates the lifespan of DNA  
845 replication factories by modulating PCNA level on the chromatin. *J Cell Biol* **200**, 31-  
846 44 (2013).
- 847 39. S. H. Park *et al.*, ATAD5 promotes replication restart by regulating RAD51 and PCNA  
848 in response to replication stress. *Nat Commun* **10**, 5718 (2019).
- 849 40. S. Sau, B. Liefshitz, M. Kupiec, The Yeast PCNA Unloader Elg1 RFC-Like Complex  
850 Plays a Role in Eliciting the DNA Damage Checkpoint. *mBio* **10**, (2019).
- 851 41. S. Thangavel *et al.*, DNA2 drives processing and restart of reversed replication forks in  
852 human cells. *J Cell Biol* **208**, 545-562 (2015).
- 853 42. A. Ait-Saada *et al.*, Chromatin remodeler Fft3 plays a dual role at blocked DNA  
854 replication forks. *Life Sci Alliance* **2**, e201900433 (2019).
- 855 43. E. Al Kubaisy, K. Arafat, O. De Wever, A. H. Hassan, S. Attoub, SMARCAD1  
856 knockdown uncovers its role in breast cancer cell migration, invasion, and metastasis.  
857 *Expert Opin Ther Targets* **20**, 1035-1043 (2016).
- 858 44. K. Arafat *et al.*, SMARCAD1 in Breast Cancer Progression. *Cell Physiol Biochem* **50**,  
859 489-500 (2018).
- 860 45. L. Henneman *et al.*, Selective resistance to the PARP inhibitor olaparib in a mouse  
861 model for BRCA1-deficient metaplastic breast cancer. *Proc Natl Acad Sci U S A* **112**,  
862 8409-8414 (2015).

- 863 46. J. E. Jaspers *et al.*, Loss of 53BP1 causes PARP inhibitor resistance in Brca1-mutated  
864 mouse mammary tumors. *Cancer Discov* **3**, 68-81 (2013).
- 865 47. M. Barazas *et al.*, Radiosensitivity Is an Acquired Vulnerability of PARPi-Resistant  
866 BRCA1-Deficient Tumors. *Cancer Res* **79**, 452-460 (2019).
- 867 48. A. A. Duarte *et al.*, BRCA-deficient mouse mammary tumor organoids to study cancer-  
868 drug resistance. *Nat Methods* **15**, 134-140 (2018).
- 869 49. E. M. Tacconi *et al.*, BRCA1 and BRCA2 tumor suppressors protect against  
870 endogenous acetaldehyde toxicity. *EMBO Mol Med* **9**, 1398-1414 (2017).
- 871 50. D. Ding *et al.*, The CUE1 domain of the SNF2-like chromatin remodeler SMARCAD1  
872 mediates its association with KRAB-associated protein 1 (KAP1) and KAP1 target  
873 genes. *J Biol Chem* **293**, 2711-2724 (2018).
- 874 51. Y. Hashimoto, A. Ray Chaudhuri, M. Lopes, V. Costanzo, Rad51 protects nascent  
875 DNA from Mre11-dependent degradation and promotes continuous DNA synthesis.  
876 *Nat Struct Mol Biol* **17**, 1305-1311 (2010).
- 877 52. S. C. S. Bantele, B. Pfander, Nucleosome Remodeling by Fun30(SMARCAD1) in the  
878 DNA Damage Response. *Front Mol Biosci* **6**, 78 (2019).
- 879 53. N. Taneja, S. I. S. Grewal, Shushing histone turnover: It's FUN protecting epigenome-  
880 genome. *Cell Cycle* **16**, 1731-1732 (2017).
- 881 54. G. Bai *et al.*, HLTF Promotes Fork Reversal, Limiting Replication Stress Resistance  
882 and Preventing Multiple Mechanisms of Unrestrained DNA Synthesis. *Mol Cell* **78**,  
883 1237-1251 e1237 (2020).
- 884 55. A. Quinet *et al.*, PRIMPOL-Mediated Adaptive Response Suppresses Replication Fork  
885 Reversal in BRCA-Deficient Cells. *Mol Cell* **77**, 461-474 e469 (2020).
- 886 56. M. Berti, D. Cortez, M. Lopes, The plasticity of DNA replication forks in response to  
887 clinically relevant genotoxic stress. *Nat Rev Mol Cell Biol*, (2020).

- 888 57. S. Awad, D. Ryan, P. Prochasson, T. Owen-Hughes, A. H. Hassan, The Snf2 homolog  
889 Fun30 acts as a homodimeric ATP-dependent chromatin-remodeling enzyme. *J Biol*  
890 *Chem* **285**, 9477-9484 (2010).
- 891 58. B. Byeon *et al.*, The ATP-dependent chromatin remodeling enzyme Fun30 represses  
892 transcription by sliding promoter-proximal nucleosomes. *J Biol Chem* **288**, 23182-  
893 23193 (2013).
- 894 59. N. Taneja *et al.*, SNF2 Family Protein Fft3 Suppresses Nucleosome Turnover to  
895 Promote Epigenetic Inheritance and Proper Replication. *Mol Cell* **66**, 50-62 e56 (2017).
- 896 60. S. F. Bunting *et al.*, BRCA1 functions independently of homologous recombination in  
897 DNA interstrand crosslink repair. *Mol Cell* **46**, 125-135 (2012).
- 898 61. F. Wienholz *et al.*, FACT subunit Spt16 controls UVSSA recruitment to lesion-stalled  
899 RNA Pol II and stimulates TC-NER. *Nucleic Acids Res* **47**, 4011-4025 (2019).
- 900 62. I. Smal, M. Loog, W. Niessen, E. Meijering, Quantitative Comparison of Spot  
901 Detection Methods in Fluorescence Microscopy. *Ieee T Med Imaging* **29**, 282-301  
902 (2010).
- 903 63. N. L. Bray, H. Pimentel, P. Melsted, L. Pachter, Near-optimal probabilistic RNA-seq  
904 quantification. *Nat Biotechnol* **34**, 525-527 (2016).
- 905 64. N. Cancer Genome Atlas Research, Integrated genomic analyses of ovarian carcinoma.  
906 *Nature* **474**, 609-615 (2011).

907

## 908 **FIG. LEGENDS**

909

910 **Fig. 1. PCNA-interacting domain of SMARCAD1 is required for its localization to active**  
911 **replication forks**

912 (A) Bar graph showing fold upregulation of selected proteins in unperturbed (no HU) and HU  
913 treated conditions based on their SILAC H:L ratios.

914 **(B)** Left: Representative high-content microscopy images showing the co-localization of  
915 chromatin bound PCNA (red) to the sites of DNA replication marked with EdU (green) in the  
916 presence or absence of HU in WT cells (note that for the HU condition EdU labelling was  
917 performed prior to HU treatment). Right: Quantification of mean intensity of PCNA foci  
918 overlapping with EdU are shown as box plot.  $n > 3000$  cells with EdU foci per condition were  
919 analysed in mid-late S phase cells. Numbers above each scatter plot indicate the mean intensity  
920 of each PCNA foci overlapping with EdU. ( $****P \leq 0.0001$ , unpaired *t*-test).

921 **(C)** Top panel: Representative high-content microscopy images showing the co-localization of  
922 chromatin bound SMARCAD1 (red) to the sites of DNA replication marked with EdU (green)  
923 in the presence or absence of HU in WT cells (note that for the HU condition EdU labelling  
924 was performed prior to HU treatment) (scale bar =  $5\mu\text{m}$ ). Quantification of mean intensity of  
925 SMARCAD1 foci overlapping with EdU are shown as box plot.  $n > 3000$  cells with EdU foci  
926 per condition were analysed in mid-late S phase cells. Numbers above each scatter plot indicate  
927 the mean intensity of each SMARCAD1 foci overlapping with EdU. ( $****P \leq 0.0001$ , unpaired  
928 *t*-test).

929 **(D)** Schematic overview of the protein domains in full-length SMARCAD1 and  $\text{N}\Delta$ -  
930 SMARCAD1.

931 **(E)** Immunoblot showing SMARCAD1 levels in WT,  $\text{N}\Delta$ -SMARCAD1 and SMARCAD1<sup>-/-</sup>  
932 MRC5 cells. Tubulin is used as a loading control. (\* represents a non-specific band, confirmed  
933 by lack of full-length transcripts in SMARCAD1<sup>-/-</sup>, as shown in Fig. S1F)

934 **(F)** Crosslinked immunoprecipitation of SMARCAD1 was performed in WT and  $\text{N}\Delta$ -  
935 SMARCAD1 cells using SMARCAD1 antibody. Western blots were performed using  
936 antibodies against PCNA and SMARCAD1 (\* represents a non-specific band).

937 **(G)** Representative images showing expression of SMARCAD1 (green) and EdU (red) in WT,  
938  $\text{N}\Delta$ -SMARCAD1 and SMARCAD1<sup>-/-</sup> cells (scale bar =  $5\mu\text{m}$ ). Note that  $\text{N}\Delta$ -SMARCAD1  
939 protein associates with chromatin but does not colocalize with EdU signal unlike in WT-  
940 SMARCAD1.

941 **(H)** Quantification of colony survival assay in WT,  $\text{N}\Delta$ -SMARCAD1 and SMARCAD1<sup>-/-</sup> cells  
942 treated with HU, cisplatin and olaparib. HU was given for 48 hours before release for 6 extra  
943 days. The mean and S.D. from three independent experiments is represented. (ns, non-  
944 significant, Unpaired *t*-test)

945 **Fig. 2. SMARCAD1 provides resistance towards replication poisons, independent of its**  
946 **role in HR repair pathway.**

947 (A) Quantification of HR efficiency using DR-GFP reporter assay. DR-GFP reporter and  
948 pcBASceI constructs were co-transfected into WT and  $\Delta$ -SMARCAD1 MRC5 cells. Relative  
949 HR efficiency representing the percentage of GFP positive cells normalised to transfection  
950 efficiency of the respective cell line is plotted. The mean and S.D. from three independent  
951 experiments is represented. ( $***P \leq 0.001$ ,  $**P \leq 0.01$ ,  $*P \leq 0.05$ , ns, non-significant, Unpaired *t*-  
952 test)

953 (B) Immunoblot showing the chromatin bound fraction of RAD51 upon 7 $\mu$ M olaparib  
954 treatment for 24 hours in WT,  $\Delta$ -SMARCAD1 and SMARCAD1<sup>-/-</sup> cells. H1.2 is used as a  
955 loading control. The numbers below the blots show the fold change of RAD51 after  
956 normalisation with H1.2 as compared to WT untreated samples, for the given blot (total n = 3).

957 (C) Top: Representative high content microscopy images depicting RAD51 foci formation  
958 upon 7 $\mu$ M olaparib treatment for 24 hours in WT,  $\Delta$ -SMARCAD1 and SMARCAD1<sup>-/-</sup> cells.  
959 Scale bar = 50  $\mu$ m. Bottom: Quantification of the number of RAD51 foci upon 7 $\mu$ m olaparib  
960 treatment for 24 hours using high-content microscopy. 4700 cells were analyzed in each  
961 condition. Solid line and dotted line represent median and mean, respectively. ( $****P \leq 0.001$ ,  
962 ns, non-significant, One-way ANOVA). Number above represented the fold change of RAD51  
963 foci upon olaparib treatment compared to its own untreated samples.

964 (D) Quantification of colony survival assay in WT,  $\Delta$ -SMARCAD1 and SMARCAD1<sup>-/-</sup> cells  
965 treated with different concentrations of olaparib. Error bars stand for  $\pm$ S.D. (n=3).  
966 ( $***P \leq 0.001$ ,  $**P \leq 0.01$ , unpaired *t*-test )

967

968 **Fig. 3. SMARCAD1 is required for proper fork progression, fork restart and genome**  
969 **stability**

970 (A) Top panel: Schematic of replication fork progression assay with CldU and IdU labeling in  
971 WT,  $\Delta$ -SMARCAD1 and SMARCAD1<sup>-/-</sup> (KO) cells. Representative DNA fibers for each  
972 condition are shown below the schematic (scale bar = 5  $\mu$ m). Bottom panel: CldU (red) and  
973 IdU (green) track length ( $\mu$ m) distribution for the indicated conditions. ( $****P \leq 0.0001$ ,  
974 Kruskal-wallis followed with Dunn's multiple comparison test, n= 3 independent experiment  
975 with similar outcomes).

976 (B) Top panel: Schematic of replication fork restart assay. Representative DNA fibers for each  
977 condition are shown below the schematic (scale bar = 5  $\mu$ m). Bottom panel: CldU (red) and  
978 IdU (green) track length ( $\mu$ m) distribution for the indicated conditions. ( $****P \leq 0.0001$ ,

979 unpaired *t*-test). All DNA fiber experiments presented here were repeated three times with  
980 similar outcomes.

981 (C) Representative image of a normal (left) and a reversed replication fork (right) observed by  
982 electron microscopy (EM). (D, daughter strand; P, parental strand; R, reversed arm).

983 (D) Bar chart representing the percentage of fork reversal in WT and  $\Delta$ -SMARCAD1 cells  
984 in untreated condition. (\*\*\*\* $P \leq 0.0001$ , unpaired *t*-test,  $n=3$  independent experiments).

985 (E) Representative electron micrographs of ssDNA gaps. (D, daughter strand; P, parental  
986 strand). Green and blue arrows point towards ssDNA gaps at the fork and behind the fork,  
987 respectively.

988 (F) Bar chart representing the distribution of ssDNA gaps behind the fork in WT and  $\Delta$ -  
989 SMARCAD1 in untreated condition and 1 hour after release from 1mM HU treatment.

990 Chi-square test of trends was done to assess significance of internal ssDNA gaps between  
991 WT and  $\Delta$ -SMARCAD1 (\*\*\*\* $P < 0.0001$ ,  $n=3$  independent experiments).

992 (G) Top panel: PFGE analysis for DSBs shows WT and  $\Delta$ -SMARCAD1 cells with and  
993 without 4mM HU treatment for 3 hours, and upon 16 hours release after the HU treatment.

994 Bottom panel: Quantification from the three independent experiments showing DSB levels.

995

#### 996 **Fig. 4. SMARCAD1 maintains PCNA level at replication forks**

997 (A) Left: Representative confocal images showing chromatin bound PCNA (red) in EdU  
998 (green) positive WT and  $\Delta$ -SMARCAD1 MRC5 cells. Nucleus was stained with DAPI (blue)  
999 (scale bar = 20  $\mu$ m). Right: QIBC analysis of the chromatin bound PCNA in WT and  $\Delta$ -  
1000 SMARCAD1 cells.  $G_{0-1}$ , S and  $G_2$ -M phase cells are labeled in red, blue and green respectively.

1001 Dotted lines represent the mean chromatin bound PCNA intensity of S-phase cells in WT cells.

1002 (B) Immunoblot showing the total level of PCNA in WT and  $\Delta$ -SMARCAD1 cells. Tubulin  
1003 is used as a loading control. Numbers below represent the quantification of PCNA level after  
1004 normalized to the loading control.

1005 (C) QIBC analysis of PCNA vs EdU is shown in WT and  $\Delta$ -SMARCAD1 cells in untreated,  
1006 1mM 1 hour HU block and 45 minutes release after HU conditions (note that for the HU block  
1007 condition EdU labelling was performed prior to HU treatment). >1,800 S-phase cells were  
1008 plotted in each condition. The color gradient represents the density of the cells.

1009 (D) Quantification of half-life of the GFP-PCNA fluorescence decay in GFP-tagged PCNA  
1010 knock-in (KI) WT and  $\Delta$ -SMARCAD1 clones, mean $\pm$ S.D. (\*\*\*\* $P \leq 0.0001$ , \*\*\* $P \leq 0.001$ ,  
1011 \*\* $P \leq 0.01$ , unpaired *t*-test).



1012 (E) Immunoblot showing the whole cell extract (WCE) and chromatin bound fraction of  
1013 RFC1, RFC4 and ATAD5 in WT and  $\Delta$ -SMARCAD1 cells. H1.2 is used as a loading control.  
1014 (F) QIBC analysis of chromatin bound PCNA intensity (normalised to DAPI) in si-control and  
1015 si-ATAD5 treated WT and  $\Delta$ -SMARCAD1 cells. ( $****P \leq 0.0001$ , unpaired *t*-test).  
1016 (G) Quantification of half-life of the GFP-PCNA fluorescence decay in GFP-tagged PCNA KI  
1017 WT #1 and  $\Delta$ -SMARCAD1 #1 cells treated with or without siATAD5. Mean $\pm$ S.D.  
1018 ( $****P \leq 0.0001$ ,  $***P \leq 0.001$ , unpaired *t*-test).

1019

1020 **Fig. 5. SMARCAD1 prevents 53BP1 enrichment at forks to maintain PCNA levels, fork**  
1021 **progression and genome stability**

1022 (A) Top Panel: Representative image showing 53BP1 (green) and EdU (red) in WT cells  
1023 treated with 4mM HU for 3hour (HU block) and 1 hour after release from HU block (HU  
1024 release) (scale bar = 5  $\mu$ m). Bottom Panel: The average distance between EdU and 53BP1 foci  
1025 in HU block and HU release condition is shown. Error bars stand for  $\pm$ S.D.

1026 (B) Top Panel: Representative confocal images showing DAPI (blue), EdU (red) and 53BP1  
1027 (green) in HU release condition in WT and  $\Delta$ -SMARCAD1 cells (scale bar = 5  $\mu$ m). Bottom  
1028 Panel: Quantification of cells showing EdU and 53BP1 co-localisation in WT and  $\Delta$ -  
1029 SMARCAD1 cells with 4mM 3hour HU block and with 1-hour HU release condition.  
1030 ( $***P \leq 0.001$ ,  $*P \leq 0.05$ , unpaired *t*-test).

1031 (C) Top panel: Schematic of replication fork restart assay. Bottom panel: CldU (red) and IdU  
1032 (green) track length ( $\mu$ m) distribution for the indicated conditions. ( $****P \leq 0.0001$ ,  $*P \leq 0.05$ ,  
1033 , ns, non-significant, Kruskal-wallis followed with Dunn's multiple comparison test, n= 3  
1034 independent experiment with similar outcomes).

1035 (D) Left: The frequency of reversed forks was quantified using electron microscopy in WT and  
1036  $\Delta$ -SMARCAD1 cells with or without 53BP1 knock down. ( $****P \leq 0.0001$ , ns, non-  
1037 significant, unpaired *t*-test). Right: Bar chart representing the distribution of ssDNA gaps  
1038 behind the fork of si-control or si-53BP1 treated WT and  $\Delta$ -SMARCAD1 cells.  
1039 ( $****P \leq 0.0001$ , ns, non-significant, Chi-square test, n= 3 independent experiment).

1040 (E) QIBC analysis of chromatin bound PCNA dynamics and DAPI in untreated, HU block and  
1041 HU release condition of si-control and si-53BP1 in WT and  $\Delta$ -SMARCAD1 cells. Cells  
1042 above dotted lines represent the PCNA positive S-phase cells in WT and  $\Delta$ -SMARCAD1  
1043 cells. The red arrows compare the level of PCNA in WT and  $\Delta$ -SMARCAD1 cells upon si-

1044 control and si-53BP1 conditions. (Note that for the HU block condition EdU labelling was  
1045 performed prior to HU treatment)

1046 (F) Quantification of colony survival assay of si-control and si-53BP1 in WT,  $\Delta$ -  
1047 SMARCAD1 cells treated with different concentrations of olaparib and cisplatin. Error bars  
1048 stand for + S.D. (n=3). ( $***P \leq 0.001$ ,  $**P \leq 0.01$ , ns, non-significant, unpaired *t*-test).

1049

1050 **Fig. 6. Smarcad1 is essential for fork progression and proliferation of BRCA1 deficient**  
1051 **mouse tumor cells**

1052 (A) Top panel: Schematic of replication fork degradation assay with CldU and IdU labeling.  
1053 Bottom panel: Ratio of IdU to CldU tract length was plotted for the indicated conditions.

1054 (B) QIBC analysis of  $\gamma$ H2AX vs EdU is shown in WT,  $\Delta$ -SMARCAD1 and SMARCAD1<sup>-/-</sup>  
1055 cells in si-control and si-BRCA1 conditions. >1,000 cells were plotted in each condition. The  
1056 color gradient represents the  $\gamma$ H2AX levels in each cells.

1057 (C) Top panel: Schematic of replication fork progression assay with CldU and IdU labeling.  
1058 Bottom panel: CldU (red) and IdU (green) track length ( $\mu$ m) distribution for the indicated  
1059 conditions. ( $****P \leq 0.0001$ ,  $***P \leq 0.001$ ,  $*P \leq 0.05$ , ns, non-significant Kruskal-wallis  
1060 followed with Dunn's multiple comparison test, n= 3 independent experiment with similar  
1061 outcomes).

1062 (D) Left: Representative images of KB1P (*Brcal*<sup>-/-</sup> *P53*<sup>-/-</sup>) mouse tumor cells pooled from three  
1063 independent experiments at day 3 and imaged at day 10, after transduction of scramble control  
1064 shRNA and shSMARCAD1#1 and #3. Right: Quantification of cell viability using crystal  
1065 violet staining assay. Error bars stand for + S.D. (n=3). ( $****P \leq 0.0001$ ,  $***P \leq 0.001$ ,  
1066  $**P \leq 0.01$ , ns, non-significant, unpaired *t*-test).

1067 (E) Top panel: Representative images of KB1P mouse tumor organoid. Image taken 5 days  
1068 after the transduction of scramble control shRNA and shSMARCAD1#1 and #3 (scale bar =  
1069 1000 $\mu$ m). Bottom panel: Quantification of cell viability using cell titer blue assay. Error bars  
1070 stand for + S.D. (n=3). ( $***P \leq 0.001$ ,  $**P \leq 0.01$ ,  $*P \leq 0.05$ , unpaired *t*-test).

1071 (F) Top panel: Schematic of replication fork progression assay. Bottom panel: CldU (red) and  
1072 IdU (green) track length ( $\mu$ m) distribution in KB1P mouse tumor cells treated with si-control  
1073 or si-SMARCAD1. ( $****P \leq 0.0001$ ,  $*P \leq 0.05$ , Kruskal-wallis followed with Dunn's multiple  
1074 comparison test, n= 3 independent experiment with similar outcomes).

1075

1076 **MATERIALS AND METHODS**

1077 **Cell line generation**

1078 Plasmid transfections were performed using X-tremeGENE 9 DNA transfection agent (Roche)  
1079 according to the manufacturer's protocol. To generate MRC5  $\Delta$ -SMARCAD1 cells, MRC5  
1080 WT cells were transfected with pLentiCRISPR-V2 plasmid (addgene: #52961) containing a  
1081 gRNA sequence targeting exon 2 of SMARCAD1, followed by puromycin selection (1  
1082  $\mu$ g/ml). To generate MRC5 SMARCAD1<sup>-/-</sup>, two gRNA sequences targeting exon 2 and exon  
1083 24 of SMARCAD1 were selected and co-transfected with homologues repair template  
1084 containing mClover reporter gene as fluorescent selection marker for FACS sorting. The  
1085 primers for gRNA are listed in Table S3.

1086 To express mClover-SMARCAD1 full length/ SMARCAD1 K528R mutant cDNA in MRC5  
1087 cells, gRNAs targeting SMARCAD1 exon2 and exon 24 were used and co-transfected with  
1088 mClover-SMARCAD1 full length/ SMARCAD1 K528R mutant cDNA respectively in MRC5  
1089 WT and  $\Delta$ -SMARCAD1 cells. The K528R mutant was generated using the full length  
1090 SMARCAD1 cDNA by site-directed mutagenesis. The primer for site-directed mutagenesis  
1091 are listed in Table S3.

1092 To generate GFP-tagged PCNA knock-in MRC5 cells, a gRNA sequence targeting exon 2 of  
1093 PCNA was selected and inserted into lentiCRISPR V2 (addgene Plasmid #52961). MRC5 WT  
1094 and  $\Delta$ -SMARCAD1 cells were transfected with the gRNA and the FLAG-GFP-PCNA repair  
1095 template and sorted by FACS sorting.

1096

1097 **Cell culture**

1098 All MRC5 human fibroblasts were cultured in a 1:1 ratio of Dulbecco's modified Eagle's  
1099 medium (DMEM) and Ham's F10 (Invitrogen) supplemented with 10% fetal calf serum (FCS,  
1100 Biowest) and 1% Penicillin–Streptomycin (PS, Sigma-Aldrich) at 37 °C and 5% CO<sub>2</sub> in a  
1101 humidified incubator.

1102 KB1P-G3, KB1P 177-a5(46, 47) and KB1P-G3B1 (47) have been described previously. All  
1103 KB1P mouse tumor cell lines were cultured in DMEM/F12+GlutaMAX (Gibco) containing  
1104 5 $\mu$ g/ml Insulin (Sigma-Aldrich), 5 ng/ml cholera toxin (Sigma-Aldrich), 5 ng/ml murine  
1105 epidermal growth-factor (Sigma-Aldrich), 10% FCS and 1% PS (Sigma-Aldrich) and under  
1106 low oxygen conditions (3% O<sub>2</sub>, 5% CO<sub>2</sub> at 37°C).

1107 All tumor-derived organoid lines have been described before(48). KB1P4N.1 and KB1P4R.1  
1108 tumor organoids were derived from a mammary KB1P PARPi-naïve and PARPi-resistant  
1109 tumor, respectively (female donor). Cultures were embedded in Culturex Reduced Growth

1110 Factor Basement Membrane Extract Type 2 (BME, Trevigen; 40 ml BME:growth media 1:1  
1111 drop in a single well of 24-well plate) and grown in Advanced DMEM/F12 (Gibco)  
1112 supplemented with 1M HEPES (Gibco), GlutaMAX (Gibco), 50 units/ml penicillin-  
1113 streptomycin (Sigma-Aldrich), B27 (Gibco), 125 mM N-acetyl-L-cysteine (Sigma-Aldrich)  
1114 and 50 ng/ml murine epidermal growth factor (Sigma-Aldrich). Organoids were cultured under  
1115 standard conditions (37°C, 5% CO<sub>2</sub>) and regularly tested for mycoplasma contamination.  
1116 Mouse embryonic stem cells (mESCs) were maintained in 2i media deficient in lysine,  
1117 arginine, and l-glutamine (PAA) at 37 °C and 5% CO<sub>2</sub> in a humidified incubator. For SILAC  
1118 labeling, cells were grown in medium containing 73 µg/ml light [<sup>12</sup>C<sub>6</sub>]-lysine and 42 µg/ml  
1119 [<sup>12</sup>C<sub>6</sub>, <sup>14</sup>N<sub>4</sub>]-arginine (Sigma-Aldrich) or similar concentrations of heavy [<sup>13</sup>C<sub>6</sub>]-lysine and [<sup>13</sup>C<sub>6</sub>,  
1120 <sup>15</sup>N<sub>4</sub>]-arginine (Cambridge Isotope Laboratories).

1121

## 1122 **Method Details**

### 1123 **siRNA transfection, shRNA transduction and Cell Titre assay**

1124 siRNA transfection was done with lipofectamine RNAiMAX (Thermofisher) according to the  
1125 manufacturer's protocol for 2 consecutive days. Knockdown efficiency was checked by  
1126 immunoblot. Details of siRNA oligomers and shRNAs used in this study are given in Table  
1127 S3.

1128 Transductions were done in duplicate in KB1P mouse tumor cells. After 3 days of selection,  
1129 KB1P mouse tumor cells were expanded to 10cm dishes. 5 days post passage, 10cm dishes  
1130 were fixed with 4% formaldehyde, stained with 0.1% crystal violet, and quantification was  
1131 carried out by determining the absorbance of crystal violet at 590 nm after extraction with 10%  
1132 acetic acid.

1133 3D Tumor-derived organoids were transduced according to a previously established  
1134 protocol(48). Puromycin selection was carried out for 3 consecutive days after transduction at  
1135 a concentration of 3 µg/ml. Pictures were taken at day 5. For quantification, cells were  
1136 incubated with Cell-Titer Blue (Promega) reagent at day 5.

1137

### 1138 **Chromatin fractionation**

1139 Cells were lysed in lysis buffer (30 mM HEPES pH 7.6, 1 mM MgCl<sub>2</sub>, 130 mM NaCl, 0.5%  
1140 Triton X-100, 0.5 mM DTT and EDTA-free protease inhibitor cocktail (Roche)), at 4 °C for  
1141 30 minutes. Chromatin-containing pellet was spinned down by centrifugation at 16,000g for  
1142 10 minutes and resuspended in lysis buffer supplemented with 250 U/µL of Benzonase (Merck  
1143 Millipore) and incubated for 15 minutes at 4 °C.

1144

### 1145 **Live cell confocal imaging**

1146 Live cell confocal laser-scanning microscopy was carried out as described before (61), with  
1147 minor adjustments. All live cell imaging experiments were performed using a Leica TCS SP5  
1148 microscope (with LAS AF software, Leica) equipped with HCX PL APO CS 63x oil immersion  
1149 objective (Leica Microsystems), at 37 °C and 5% CO<sub>2</sub>. For Inverse FRAP (iFRAP), GFP-  
1150 PCNA expressing WT and NΔ-SMARCAD1 MRC5 cells were seeded on 24 mm coverslips.  
1151 Cells were continuously bleached at high 488 nm laser outside the selected GFP-PCNA foci  
1152 and the fluorescence decrease of the selected foci was determined over time. The resulting  
1153 dissociation curves were background-corrected and normalized to pre-bleach values, set at 1.

1154

### 1155 **DR-GFP reporter assay**

1156 The procedure for DR-GFP reporter was described previously (30) and applied with minor  
1157 alterations. After being seeded in a 6-well plate for 24 hours, cells were co-transfected with 1.5  
1158 µg of DR-GFP reporter plasmid (addgene #26475) and 1.5 µg I-SceI expression vector  
1159 (addgene # 26477) or empty vector using X-tremeGENE 9 DNA transfection agent (Roche)  
1160 according to the manufacturer's protocol for 24 hours. p-MAX-GFP plasmid (addgene #16007)  
1161 was transfected in parallel to assess transfection efficiency. Another round of transfection was  
1162 done on day 2. On day 3, cells were harvested and GFP expression was analyzed by flow  
1163 cytometer.

1164

### 1165 **DNA fiber analysis**

1166 DNA fiber analysis was carried out according to the standard protocol as mentioned previously  
1167 (34). Briefly, cells were sequentially pulse-labeled with 30 µM CldU (MP Biomedicals) and  
1168 250 µM IdU (Sigma-Aldrich) according to the schematic in each figure. For mirin treatment,  
1169 100µM Mirin was added to the cell culture media for 2 hours prior to the CldU and IdU  
1170 labeling. After labeling, cells were collected and resuspended in PBS at  $5 \times 10^5$  cells per ml.  
1171 The labeled cells were mixed with equal amount of unlabeled cells, and 2.5 µl of mixed cells  
1172 were added to 8 µl of lysis buffer (200 mM Tris-HCl, pH 7.5, 50 mM EDTA, and 0.5% (w/v)  
1173 SDS) on a glass slide. After 8 minutes, the slides were tilted at 30–45°, and the resulting DNA  
1174 spreads were air dried, fixed in 3:1 methanol/acetic acid overnight at 4 °C. The fibers were  
1175 denatured with 2.5 M HCl for 1 hour, washed with PBS and blocked with 0.1% Tween 20 in  
1176 2% BSA/PBS for 40 minutes. The newly replicated CldU and IdU tracks were labeled for 2

1177 hours in dark with anti-BrdU antibodies recognizing CldU (1:100)(Abcam, ab6326) and IdU  
1178 (1:100)(BD, 347580), followed by 1 hour incubation with secondary antibodies in the dark:  
1179 anti-mouse Alexa Fluor 488 (1:250) (Invitrogen, A-11001) and anti-rat Cy3 (1:250) (Jackson  
1180 Immuno-Research Laboratories, 712-166-153). Fibers were visualized and imaged by Carl  
1181 Zeiss Axio Imager D2 microscope using 63X Plan Apo 1.4 NA oil immersion objective.  
1182 ImageJ software was used for the quantification. The Kruskal-Wallis test followed by Dunn's  
1183 multiple comparison test was applied for statistical analysis using the GraphPad Prism  
1184 Software. The combined summary of DNA fiber spread data analysis is given in Table S2.

1185

### 1186 **Immunoblot and antibodies**

1187 After lysed with RIPA buffer supplemented with protease inhibitor (Roche)(whole cell lysate)  
1188 or resuspended in chromatin fractionation lysis buffer (chromatin bound proteins), samples  
1189 were mixed with 2x Laemmli sample buffer (Supelco) and heated at 95°C for 5 minutes.  
1190 Samples were loaded on 4–12% NuPAGE Bis-Tris Gel (Novex life technologies) and  
1191 transferred to a Polyvinylidene difluoride (PVDF) membrane (0.45µm, Immobilon).  
1192 Membranes were blocked with 5% BSA in PBS for 1 hour at room temperature and incubated  
1193 with mouse anti-alpha-tubulin monoclonal antibody (sigma, T6074), rabbit anti-SMARCAD1  
1194 antibody (Atlas, HPA016737), mouse anti-PCNA monoclonal antibody (abcam, ab29), rabbit  
1195 anti-Histone H1.2 antibody (abcam, ab17677), mouse anti-RPA32/RPA2 antibody (abcam,  
1196 ab2175), rabbit anti-GFP antibody (abcam, ab290), rabbit anti-Atad5 antibody (abcam,  
1197 ab72111), rabbit anti-Histone H3 antibody (abcam, ab1791) or mouse anti-p37 (GeneTex,  
1198 1320) diluted in blocking buffer overnight at 4°C. Membranes were washed in 0.1% Tween-  
1199 20 in PBS on the following day, followed by incubation with secondary antibody coupled to  
1200 near-IR dyes CF<sup>TM</sup>680/CF<sup>TM</sup>770 (1:10,000)(Sigma, SAB4600205 &SAB4600215).  
1201 Antibodies were visualized using an Odyssey CLx infrared scanner (LiCor). ImageJ software  
1202 was used for the quantification of bands on western blots, wherever applicable.

1203

### 1204 **Immunofluorescence staining**

1205 Cells were labeled with EdU (10 µM) for 30 minutes to identify cells in S-phase, unless  
1206 otherwise mention for the EdU progression experiment. For HU treated samples, EdU is  
1207 labeled before the HU treatment. For analysis of the chromatin bound protein, cells were first  
1208 pre-extracted with 0.1% Triton-X 100 in ice-cold CSK buffer for 5 minutes at 4°C before  
1209 fixation. Cells are fixed in 2% formaldehyde in PBS for 15 minutes at room temperature for  
1210 SMARCAD1 (Atlas, HPA016737), 53BP1 (Novus, NB100-304) , RAD51 (B-Bridge

1211 International, 70-001) and  $\gamma$ H2AX (Merck Millipore, 05-636) or 100% -20°C methanol for 10  
1212 minutes for PCNA(abcam, ab29). Subsequently, samples were permeabilized in 0.1% Triton-  
1213 X 100 in PBS for 10 minutes, and blocked with 5% BSA in PBS. Samples were subsequently  
1214 stained with primary antibody diluted in blocking buffer, followed by incubation in  
1215 fluorescence conjugated secondary antibody. EdU was visualized with a click-it reaction using  
1216 Alexa Fluor® 488 azide (Invitrogen, C10337) or Alexa Fluor® 594 azide (Invitrogen, C10646)  
1217 according to the manufacturer's protocol. Samples were washed with PBS and incubated with  
1218 0.1ug/ml DAPI for 15 minutes. ProLong™ Gold antifade mountant (Invitrogen) was used to  
1219 mount the samples on the glass slides for coverslip samples.

1220

### 1221 **Image acquisition and image analysis**

1222 Coverslip images were obtained using a LSM700 microscope equipped with a plan-  
1223 apochromat 63x/1.4 Oil M27 objective (Carl Zeiss Micro imaging), or SP5 microscope  
1224 equipped with HCX PL APO CS 63x Oil objective (Leica). The analysis of the image data has  
1225 been conducted using custom-built ImageJ plugins. The detection of EdU positive (and  
1226 negative) cells was performed using the 488 nm channel in combination with the DAPI channel  
1227 by applying a cross entropy based thresholding and the binary watershed segmentation (in  
1228 order to deal with touching cells). The adjustment of brightness and contrast was applied  
1229 differently due to differential backgrounds in the indicated cell lines of Fig. 1G for the  
1230 qualitative representation. To compute the Pearson and Manders' overlap coefficients in Fig.  
1231 S4B, the 53BP1 foci in 488 and 568 nm channels for EdU positive cells were segmented using  
1232 an à-trous wavelet transform with 3 scales, and the wavelet coefficients were thresholded at  
1233 the level of 3-sigma (62). To measure the distance between 53BP1 and EdU foci in Fig. 5A, a  
1234 line of 3 $\mu$ m was drawn across the proximal foci and the intensity of the two channels were  
1235 measured using multi plot in imageJ. Further analysis was done using Microsoft Excel. For  
1236 high-content imaging given in Fig. 1B, 1C, 2C, 4A, 4C, 5E & fig. S1D and S2G , all the data  
1237 was obtained using Opera Phenix High-Content Screening System (PerkinElmer) with 40x  
1238 water objective (NA 1.1) and analyzed with the Harmony v4.9 high-content imaging and  
1239 analysis software (PerkinElmer) using a custom script. At least 75 field per well were imaged  
1240 as a Z-stack of 8 planes (stepsize 1 $\mu$ m). In the maximum projection, nuclei were detected using  
1241 the DAPI signal and filtered for nuclear roundness (>0.7) and size (70–250  $\mu$ m<sup>2</sup>) to exclude  
1242 dead nuclei, and clusters of multiple nuclei. Selection of S phase cells was based on EdU signal  
1243 in UT and HU block condition. In HU release condition, S phase cells were determined by

1244 intensity of PCNA median. The pixel intensities (sum) were determined in the DAPI, 488 nm  
1245 and 568 nm channel for the individual nucleus. PCNA sum normalized to DAPI sum was  
1246 shown in the bar chart. For quantification of EdU positive foci in Fig. 1B & 1C and fig. S1D,  
1247 an additional mask was generated based on the detection of local intensity maxima (region to  
1248 spot intensity) in the EdU channel, and used for quantification of spot intensities together with  
1249 spot contrast in the 488 & 568 nm channels. For quantification of RAD51 positive foci in Fig.  
1250 2C, a mask was generated in the RAD51 channel using the detection of local intensity maxima  
1251 (region to spot contrast and intensity) in the RAD51 channel, with an upper threshold for spot  
1252 radius. The desired quantified values for each foci/cell were exported to the Tibco spotfire  
1253 software for generation of scatter diagrams.

1254

### 1255 **RNA extraction, Reverse Transcription, Real-time qPCR and RNA-seq**

1256 Total RNA was extracted using the ReliaPrep™ RNA Miniprep Systems (Promega) according  
1257 to the manufacturer's instructions. 1000 ng of total RNA was used to synthesis cDNA using  
1258 M-MLV Reverse Transcriptase, RNase H Minus, Point Mutant (Promega) according to the  
1259 manufacturer's instructions. Real-time qPCR was performed using the GoTaq®qPCR Master  
1260 Mix (Promega), beta-actin was used for normalization. Primers used for qPCR are listed in  
1261 Table S3.

1262 NGS short reads were trimmed using fastp and processed using Kallisto, an RNAseq  
1263 quantification program that uses a pseudoalignment method of assigning reads to genomic  
1264 locations in lieu of a more costly traditional alignment(63). The human transcriptome, version  
1265 GRCh38.p12, was indexed, the paired, trimmed reads assigned to transcripts, and read counts  
1266 converted to transcripts per million (TPM) by Kallisto. TPMs from transcripts originating from  
1267 the same gene were aggregated and relative expression levels were computed as the log<sub>2</sub> fold  
1268 change relative to the matched wild type using an in-house script (available upon request).  
1269 RPKM values were computed from TPMs using the median transcript length per gene.

1270 Pseudoalignments, output by Kallisto in standard BAM format, were used to assess transcript  
1271 structure such as the assignment of the transcription start for NΔ-SMARCAD1. Boxplots and  
1272 barplots were produced using ggpubr and ggplot2 respectively in R program (the R  
1273 Foundation).

1274

### 1275 **iPOND-SILAC mass-spectrometry**



1276 For iPOND experiments, light lysine and arginine labeled mESCs cells were incubated with  
1277 10  $\mu$ M EdU for 10 minutes and treated with 4mM HU (Sigma-Aldrich) for 3 hour to stall the  
1278 DNA replication forks. Heavy lysine and arginine labeled mESCs cells were only incubated  
1279 with 10  $\mu$ M EdU for 10 minutes. After labeling and treatment cells were cross-linked with 1%  
1280 formaldehyde for 10 min at room temperature, quenched with 0.125 M glycine, washed with  
1281 PBS and harvested using cell scrapper. Samples were then treated with click reaction  
1282 containing 25  $\mu$ M biotin-azide, 10 mM (+) sodium l-ascorbate and 2 mM CuSO<sub>4</sub> and rotated  
1283 at 4 °C for 1 h. Samples were then centrifuged to pellet down the cells; supernatant was  
1284 removed and replaced with 1 ml Buffer-1 (B1) containing 25 mM NaCl, 2 mM EDTA, 50 mM  
1285 Tris-HCl, pH 8.0, 1% IGEPAL and protease inhibitor and rotated again at 4 °C for 30 min This  
1286 step was repeated twice. Samples were centrifuged to pellet down the cells; supernatant was  
1287 removed and replaced with 500  $\mu$ l of B1 and sonicated using a Bioruptor Sonicator  
1288 (Diagenode) using cycles of 20 s ON, 90 s OFF for 30 times at high amplitude. Samples were  
1289 centrifuged, and supernatant was transferred to fresh tubes and incubated for 1 hour with 200  $\mu$ l  
1290 of Dynabeads MyOne C1 (Sigma-Aldrich) for the streptavidin biotin capture step. Proteins  
1291 were eluted, and mass-spectrometry was performed. At least two peptides were required for  
1292 protein identification. Quantitation is reported as the log<sub>2</sub> of the normalized heavy/light ratios.  
1293 SILAC data were analyzed using MaxQuant. The resulting output tables of two independent  
1294 experiment were merged and used as the input for calculating the average fold-change to  
1295 identify significantly upregulated proteins in unperturbed forks and stalled forks based on H:L  
1296 ratio in the SILAC experiment in the MaxQuant software (9).

1297

### 1298 **Crosslinked immunoprecipitation**

1299 The procedure for in vivo crosslink and immunoprecipitation was described previously(61) and  
1300 applied with minor alterations. After removal of medium, cells were cross-linked in 1%  
1301 formaldehyde in serum-free medium for 10 minutes at room temperature. Crosslinking reaction  
1302 was stopped with 0.125 M of glycine and cells were collected in ice cold PBS supplemented  
1303 with 10% glycerol. Crosslinked cells were scrapped and chromatin was purified as  
1304 described(61). Chromatin was sheared using a Bioruptor Sonicator (Diagenode) using cycles  
1305 of 20 s ON, 60 s OFF during 15 minutes, after which samples were centrifuged. The  
1306 supernatant containing crosslinked chromatin was used for immunoprecipitation. For  
1307 immunoprecipitation, extracts were incubated with either GFP-trap beads (ChromoTek),  
1308 53BP1 (1.8 $\mu$ g) or SMARCAD1 (1.8 $\mu$ g) antibody overnight at 4 °C. For IP with 53BP1 and

1309 SMARCAD1 antibody, Protein A agarose/Salmon Sperm DNA slurry (Millipore) was added  
1310 for 4 hour at 4 °C. Subsequently, beads were washed five times in RIPA buffer and elution of  
1311 the precipitated proteins was performed by extended boiling in 2x Laemmli sample buffer  
1312 (Sigma-Aldrich) for immunoblotting analysis.

1313

### 1314 **Clonogenic survival assay**

1315 Cells were seeded in triplicate in 10cm culturing dish and treated with a single dose of olaparib  
1316 (selleckchem), cisplatin (Sigma-Aldrich) or hydroxyurea(HU) (Sigma-Aldrich) 1 day after  
1317 seeding. For hydroxyurea, HU was given at the indicated concentration for 24 hours or 48  
1318 hours as indicated in the Fig. legend before being washed off and replaced with new medium.  
1319 For olaparib, different concentrations of olaparib were given to the cells throughout the whole  
1320 experimental process. For cisplatin, different concentrations of cisplatin were given to the cells  
1321 for 4 hours before being washed off and replaced with new medium, except the 1  $\mu$ M cisplatin  
1322 group in Fig. 5F and S3H, which were given throughout the whole experimental process.

1323 After 1 week, colonies were fixed and stained in a mixture of 43% water, 50% methanol, 7%  
1324 acetic acid and 0.1% Brilliant Blue R (Sigma-Aldrich) and subsequently counted with the  
1325 Gelcount (Oxford Optronix). The survival was plotted as the mean percentage of colonies  
1326 detected following the treatment normalised to the mean number of colonies from the untreated  
1327 samples.

1328

### 1329 **Cell cycle analysis**

1330 Cells were grown to 70–80% confluency in a 10cm culturing dish. Cells were labeled with  
1331 EdU for 30 minutes followed by fixation for 10 minutes in 4% formaldehyde in PBS at room  
1332 temperature. Cells were then washed with 1% BSA/PBS and permeabilized in 0.5% saponin  
1333 buffer in 1% BSA/PBS. Incorporated EdU were labelled with the click-it reaction using Alexa  
1334 Fluor® 594 azide according to the manufacturer's protocol (Invitrogen). DAPI was used to  
1335 stain the DNA.

1336

### 1337 **Electron microscope analysis**

1338 EM analysis was performed according to the standard protocol(35). For DNA extraction, cells  
1339 were lysed in lysis buffer and digested at 50 °C in the presence of Proteinase-K for 2 hour. The  
1340 DNA was purified using chloroform/isoamyl alcohol and precipitated in isopropanol and given  
1341 70% ethanol wash and resuspended in elution buffer. Isolated genomic DNA was digested with

1342 PvuII HF restriction enzyme for 4 to 5 hour. After the digestion, the DNA solution was  
1343 transferred to a Microcon DNA fast flow centrifugal filter. The filter was washed with TE  
1344 buffer after spinning for 7 minutes. The benzyldimethylalkylammonium chloride (BAC)  
1345 method was used to spread the DNA on the water surface and then loaded on carbon-coated  
1346 nickel grids and finally DNA was coated with platinum using high-vacuum evaporator MED  
1347 010 (Bal Tec). Microscopy was performed with a transmission electron microscope FEI Talos,  
1348 with 4 K by 4 K CMOS camera. For each experimental condition, at least 200 replication fork  
1349 intermediates were analyzed from three independent experiments and MAPS software  
1350 (Thermo Fisher) was used to analyze the images.

1351

### 1352 **Pulsed-field gel electrophoresis**

1353 For HU treated samples, cells were treated with 4mM HU for 3 hours, follow or not with a 16  
1354 hour release, before harvest for PFGE assay. DSB detection by PFGE was done as reported  
1355 previously (9). Briefly, cells were cast into 0.8% agarose plug ( $2.5 \times 10^5$  cells/plug), digested  
1356 in lysis buffer (100 mM EDTA, 1% sodium lauryl sarcosine, 0.2% sodium deoxycholate,  
1357 1 mg/ml proteinase-K) at 37 °C for 48 hour, and washed in 10 mM Tris-HCl (pH 8.0)–100 mM  
1358 EDTA. Electrophoresis was performed at 14°C in 0.9% pulse field-certified agarose (Bio-Rad)  
1359 using Tris-borate-EDTA buffer in a Bio-Rad Chef DR III apparatus (9 h, 120°, 5.5 V/cm, and  
1360 30- to 18-s switch time; 6 h, 117°, 4.5 V/cm, and 18- to 9-s switch time; and 6 h, 112°, 4 V/cm,  
1361 and 9- to 5-s switch time). The gel was stained with ethidium bromide and imaged on Uvidoc-  
1362 HD2 Imager. ImageJ software was used for the quantification of broken DNA normalized to  
1363 unbroken DNA for each lane.

1364

### 1365 **Purification of SMARCAD1 and mass spectrometry**

1366 NA-SMARCAD1 protein was purified from whole cell lysate using MRC5 NA-SMARCAD1  
1367 cell line. Cells were resuspended in the IP buffer and sheared 10 time as 15s on and then 45s  
1368 off at mode High using a Bioruptor Sonicator (Diagenode) at 4°C, and incubated with 500U of  
1369 Benzonase (Merck Millipore) for 60 minutes, after which samples were centrifuged. The  
1370 supernatant was used for immunoprecipitation. For immunoprecipitation, extracts were  
1371 incubated with SMARCAD1 (1.8µg) antibody overnight at 4 °C. Protein A agarose/Salmon  
1372 Sperm DNA slurry (Millipore) was added for 2 hour at 4 °C. Subsequently, beads were washed  
1373 five times in IP buffer and elution of the protein was performed by extensive boiling in 2x  
1374 Laemmli sample buffer (Sigma-Aldrich). Eluted protein was run on 4–12% NuPAGE Bis-Tris

1375 Gel (Novex life technologies), gel slices were trypsinized, and peptides were analyzed by mass  
1376 spectrometry to determine the protein sequence as described previously(61).

1377

### 1378 **Bioinformatic analysis on TCGA datasets**

1379 Disease-free survival curves of TCGA high grade serous ovarian carcinoma (HGSOC) patients  
1380 were generated by the Kaplan–Meier method and differences between survival curves were  
1381 assessed for statistical significance with the log-rank test. We divided the TCGA ovarian  
1382 carcinoma patients expressing replication stress markers (CCNE1 overexpression, CDKN2A  
1383 low expression and/or RB1 deletion) into cohorts according to their BRCA1 mRNA expression  
1384 levels: BRCA1 low (below median), and BRCA1-high (above median) (64). In each of these  
1385 cohorts, we analysed the correlation between SMARCAD1 expression with outcome.  
1386 Normalization of expression values was performed using z-score transformation, such that low  
1387 SMARCAD1 expression with z-score  $< 0.75$  and high SMARCAD1 expression with z-score  
1388  $> 0.75$  (fig. S5C). Cohort with BRCA1-high, SMARCAD1-low expression, n = 66; BRCA1-  
1389 low, SMARCAD1-high expression, n = 10. Cohort with BRCA1-low, SMARCAD1- low  
1390 expression, n = 87; BRCA1-low, SMARCAD1-high expression n = 10.

1391

### 1392 **Quantification and Statistical Analysis**

1393 For all data, the means, S.D. and S.E.M. were calculated using either Microsoft Excel or  
1394 GraphPad Prism 8.

1395

1396

Figure 1

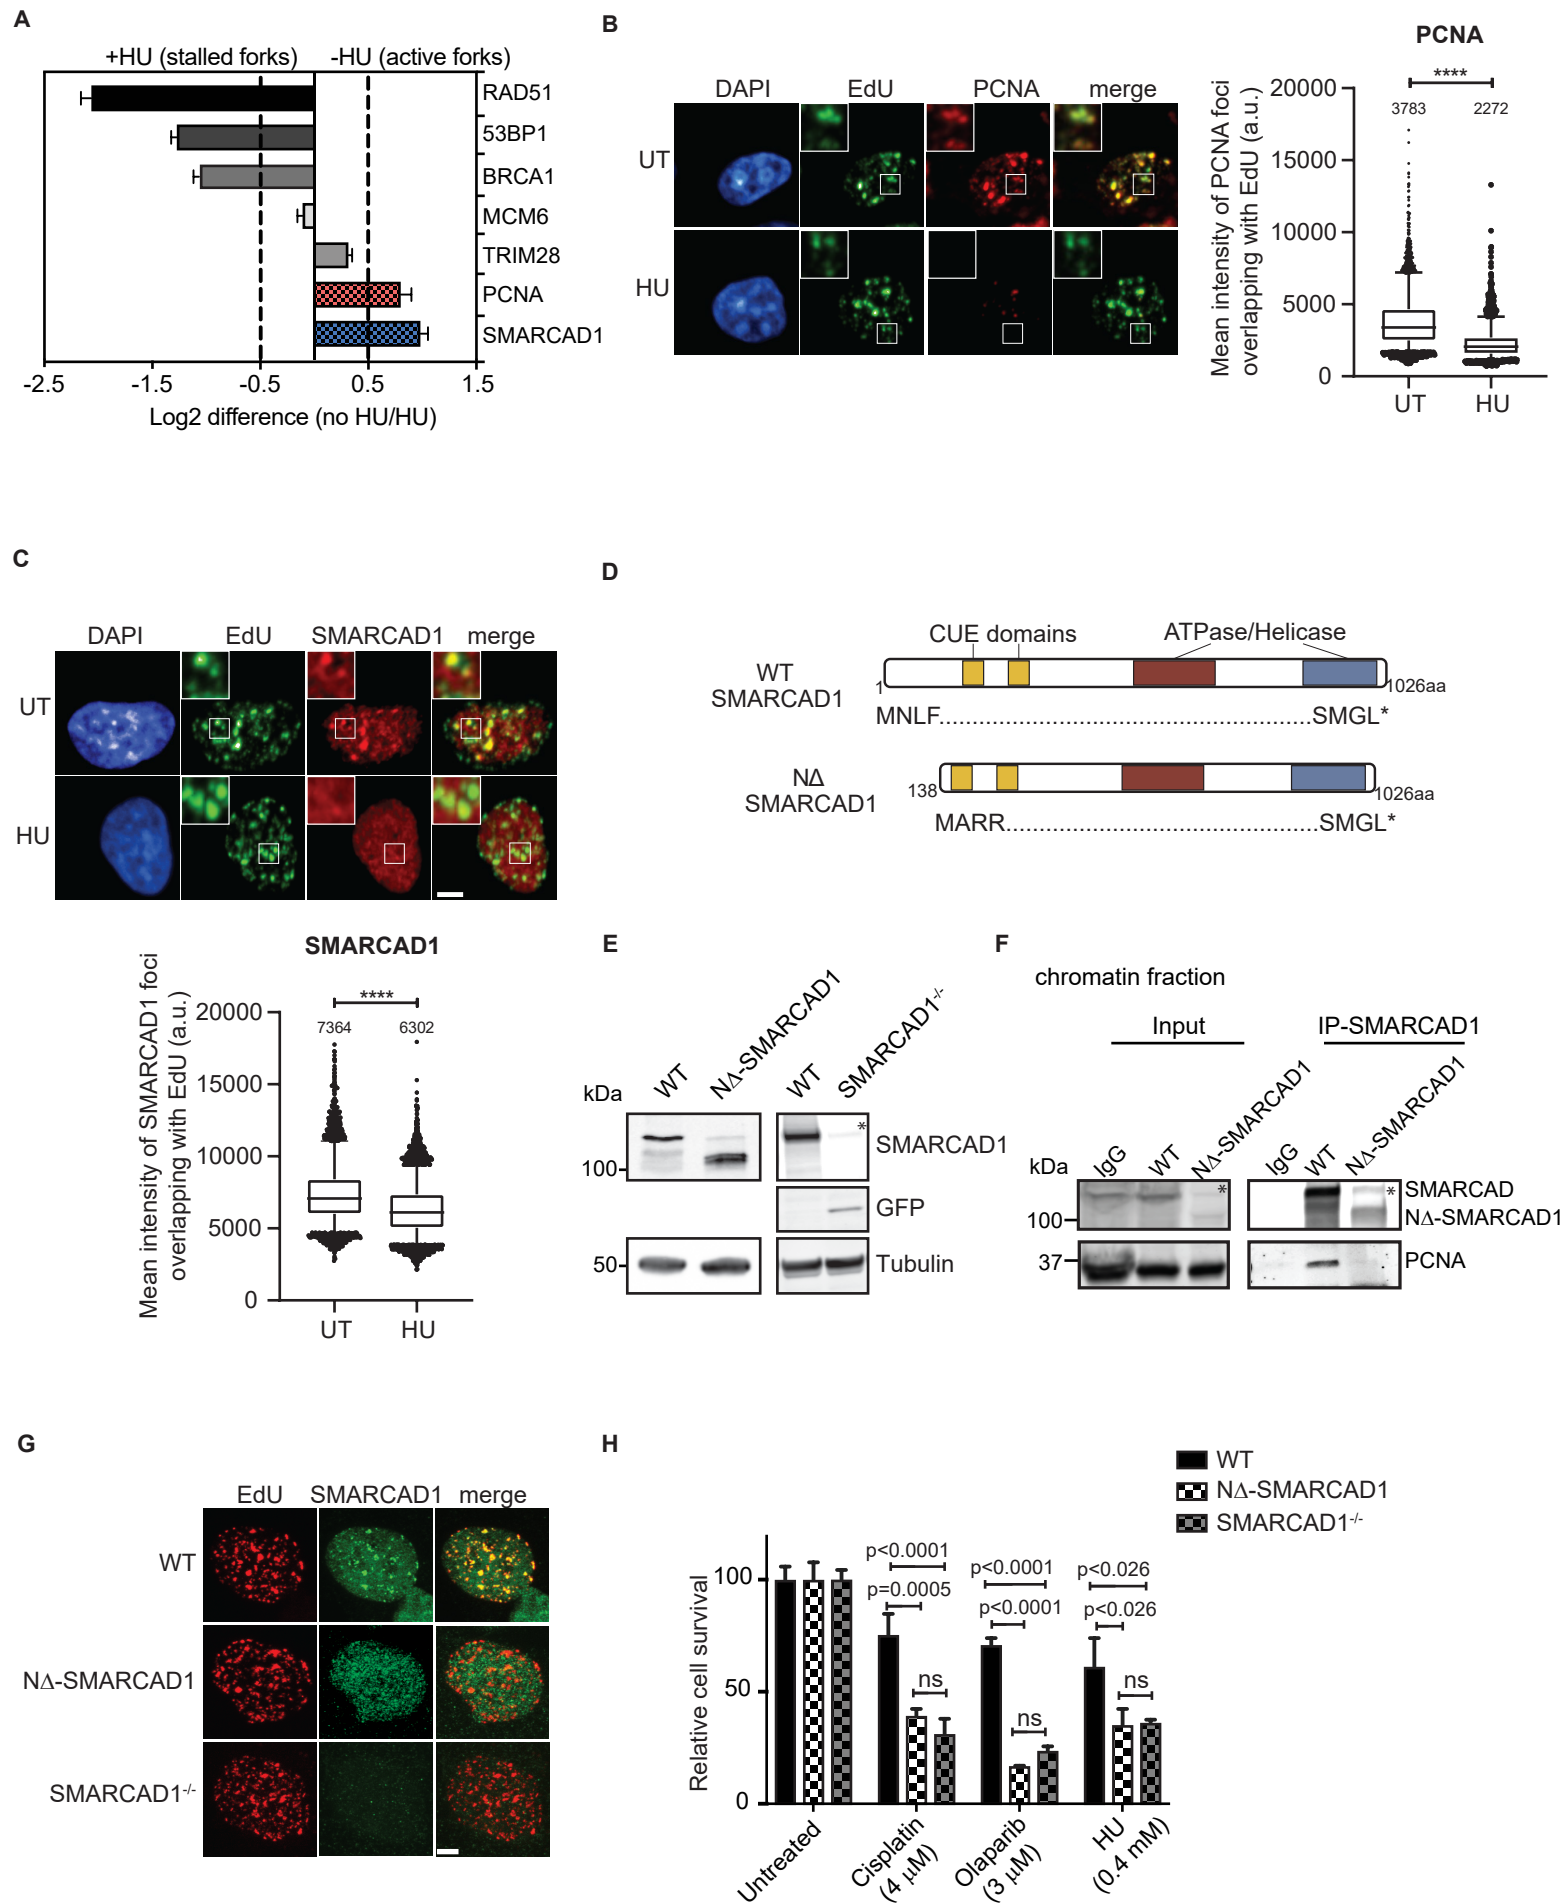

Figure 2

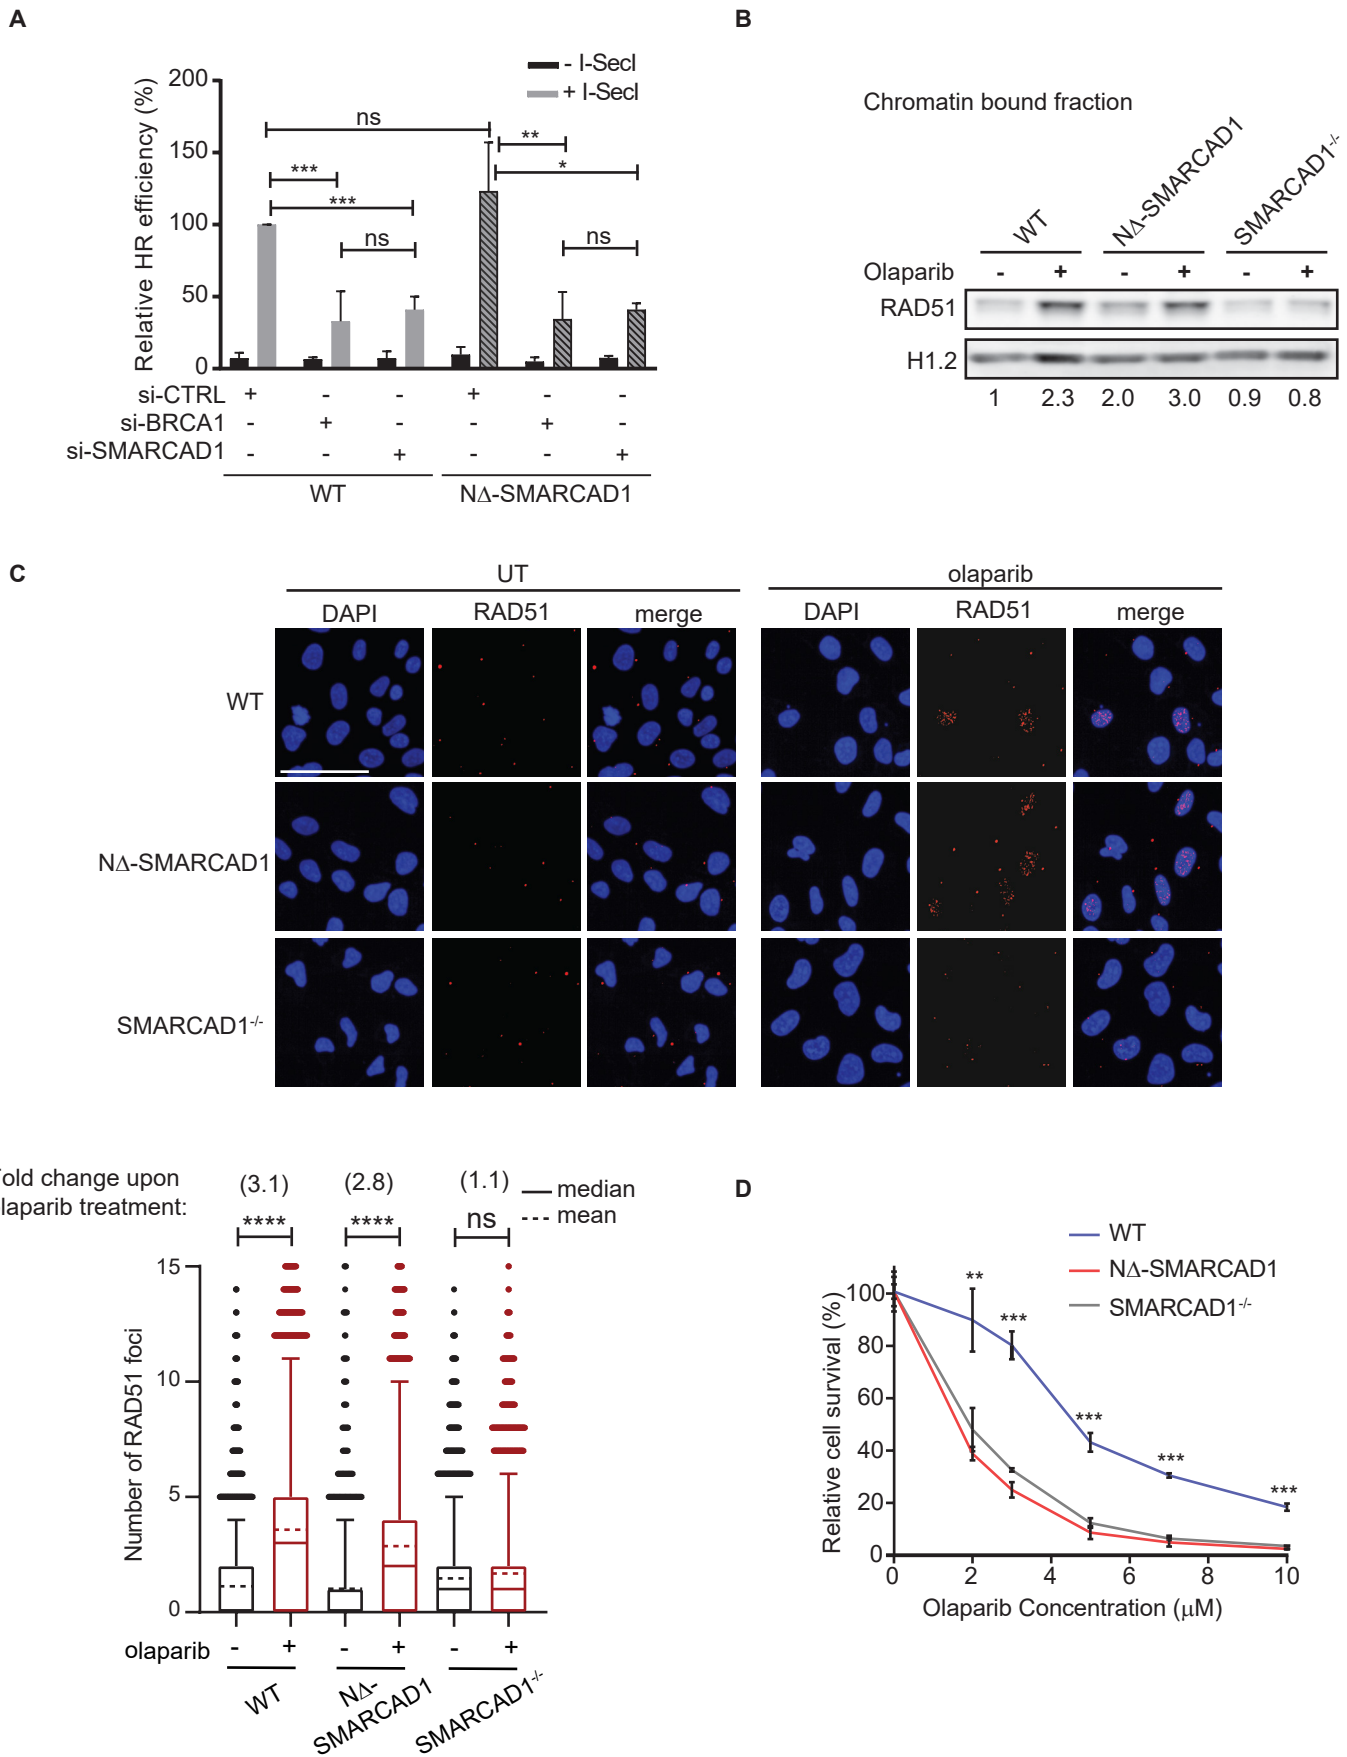

### Figure 3

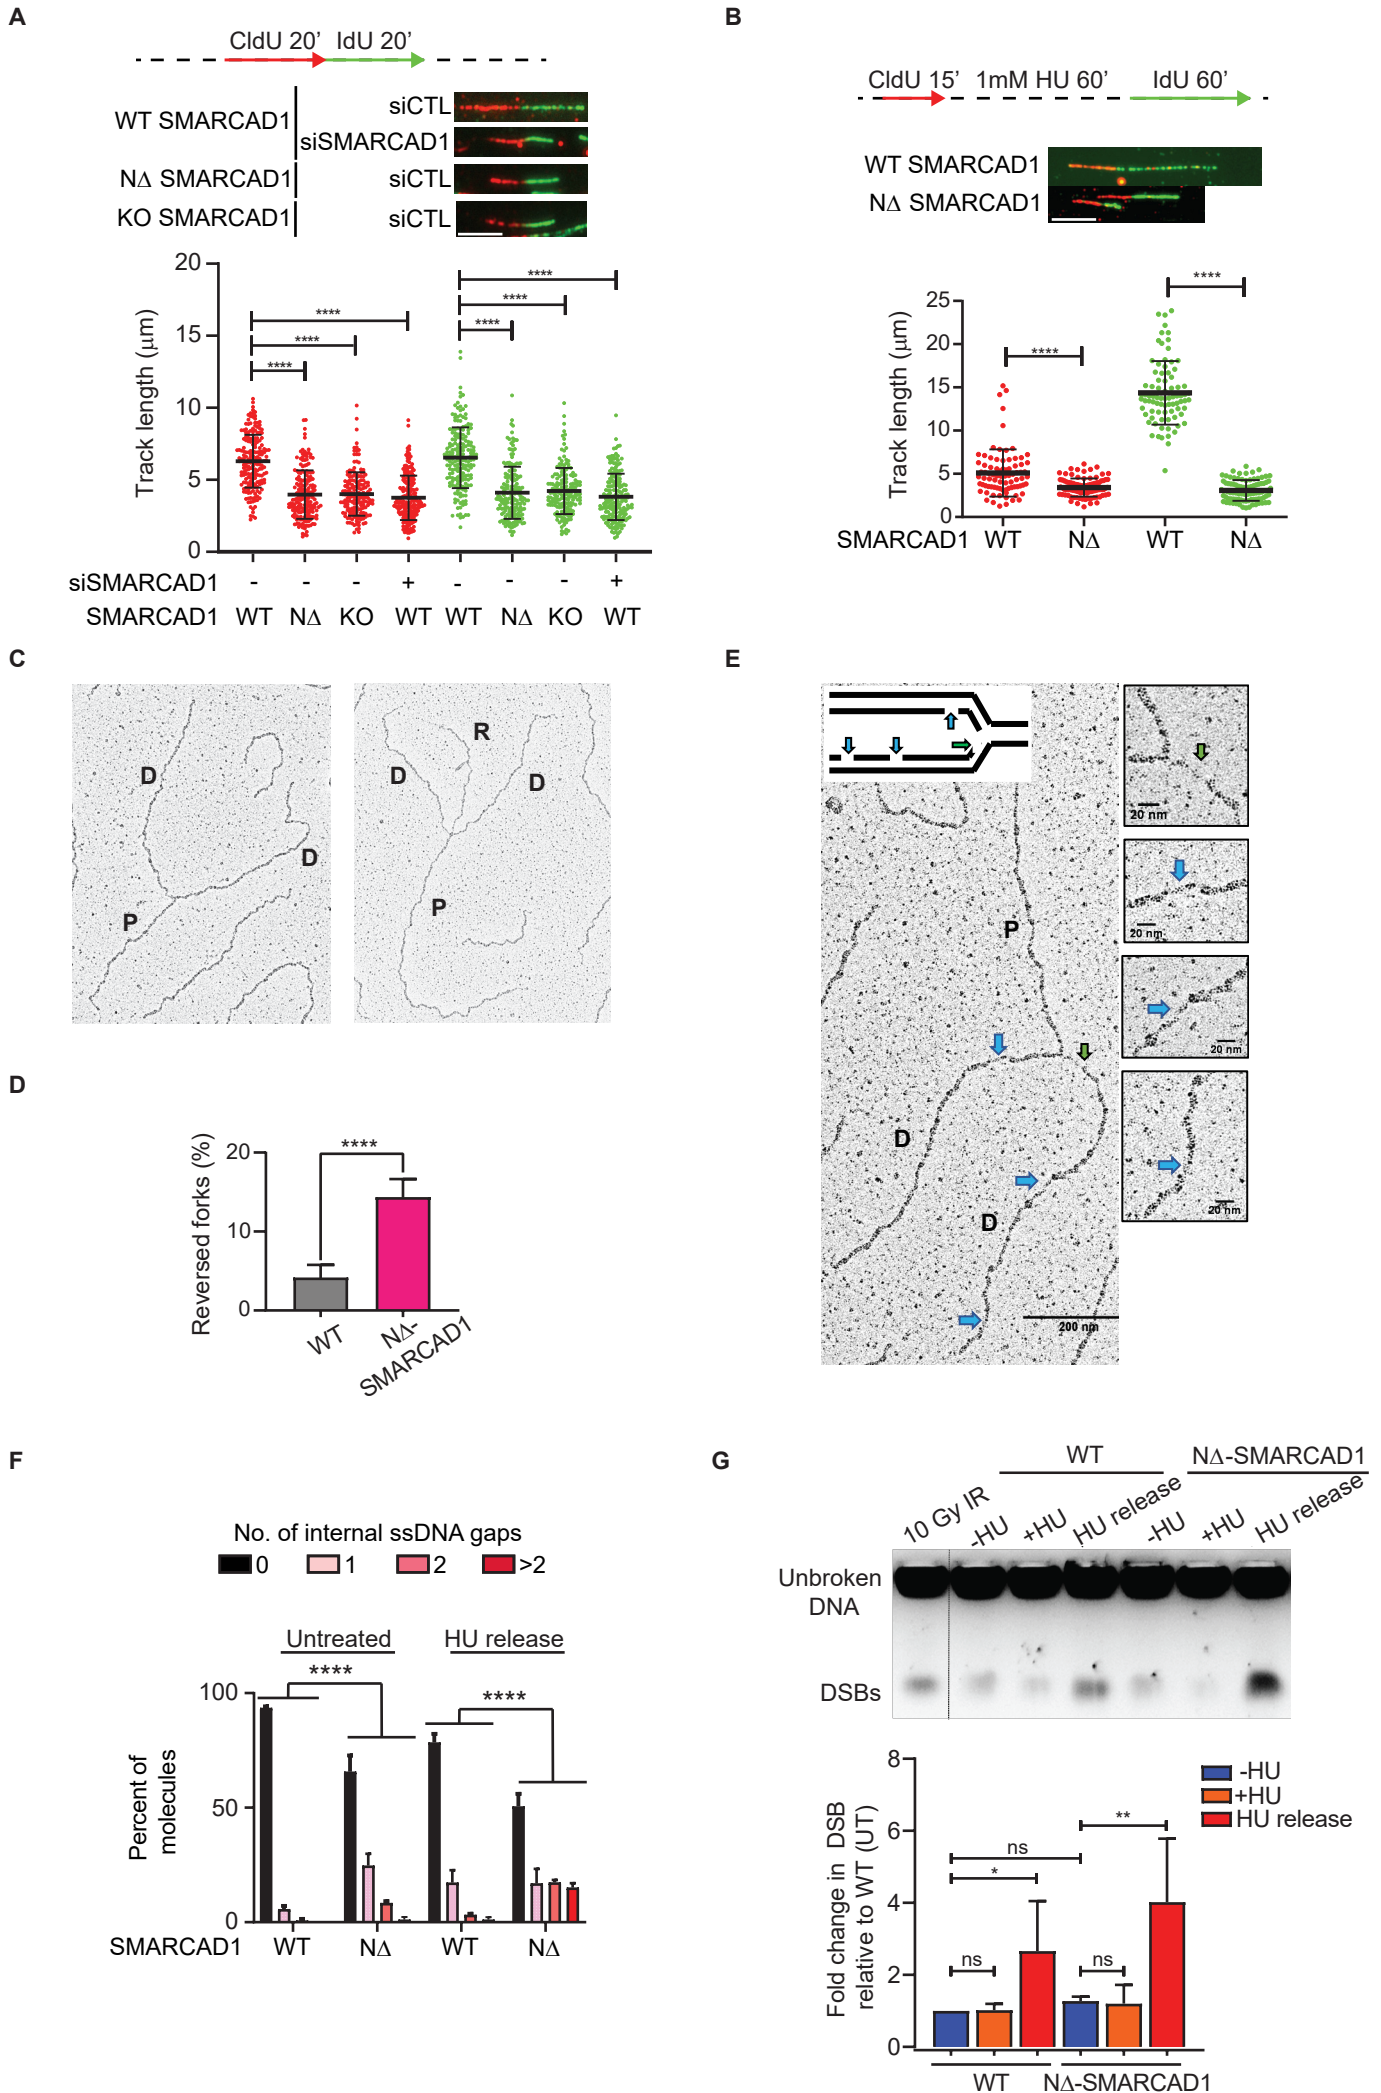

Figure 4

A

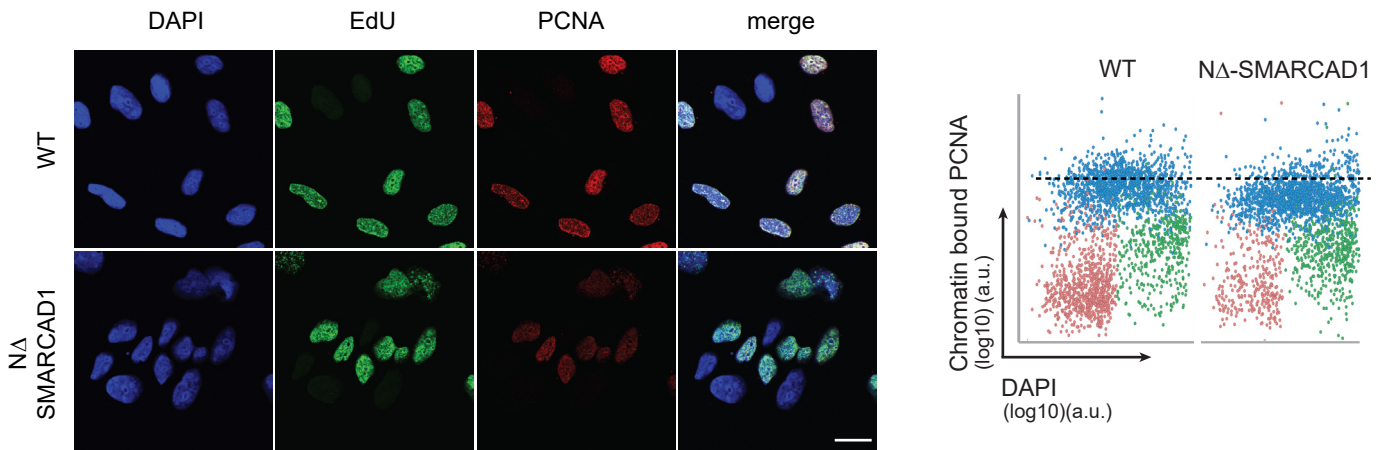

B

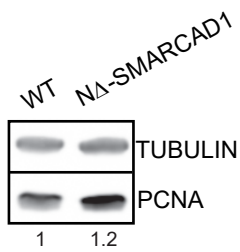

C

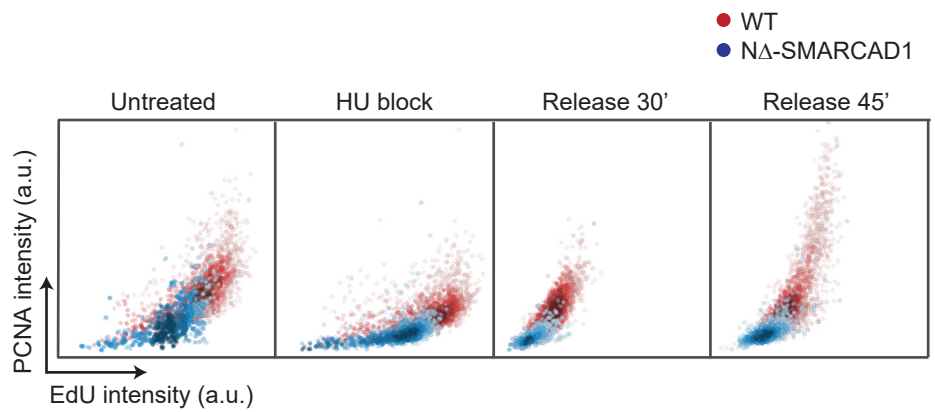

D

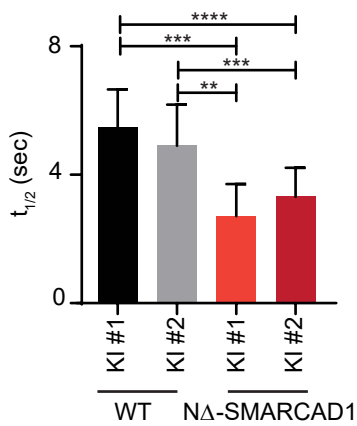

E

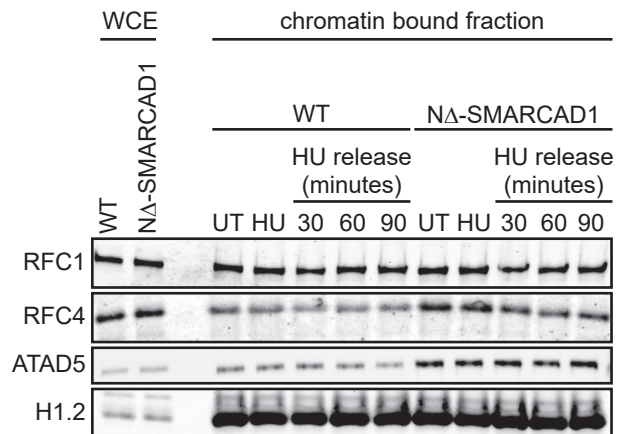

F

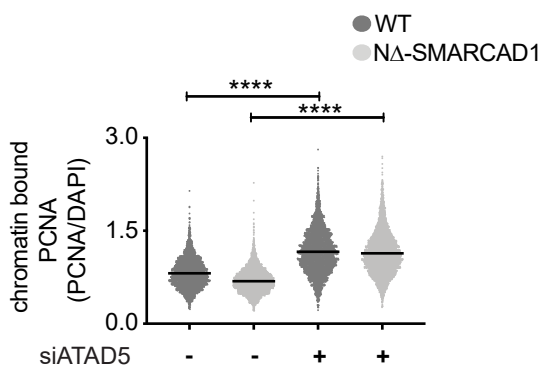

G

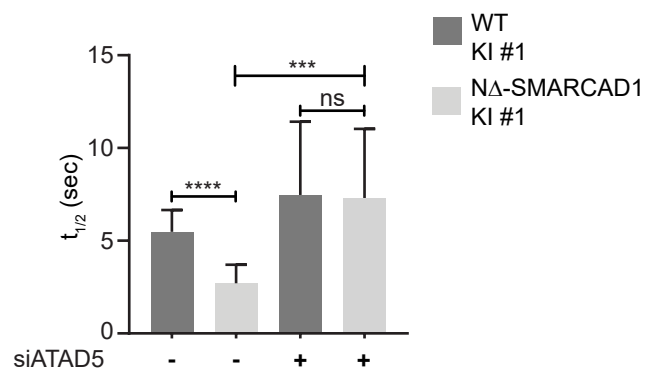



## Figure 5

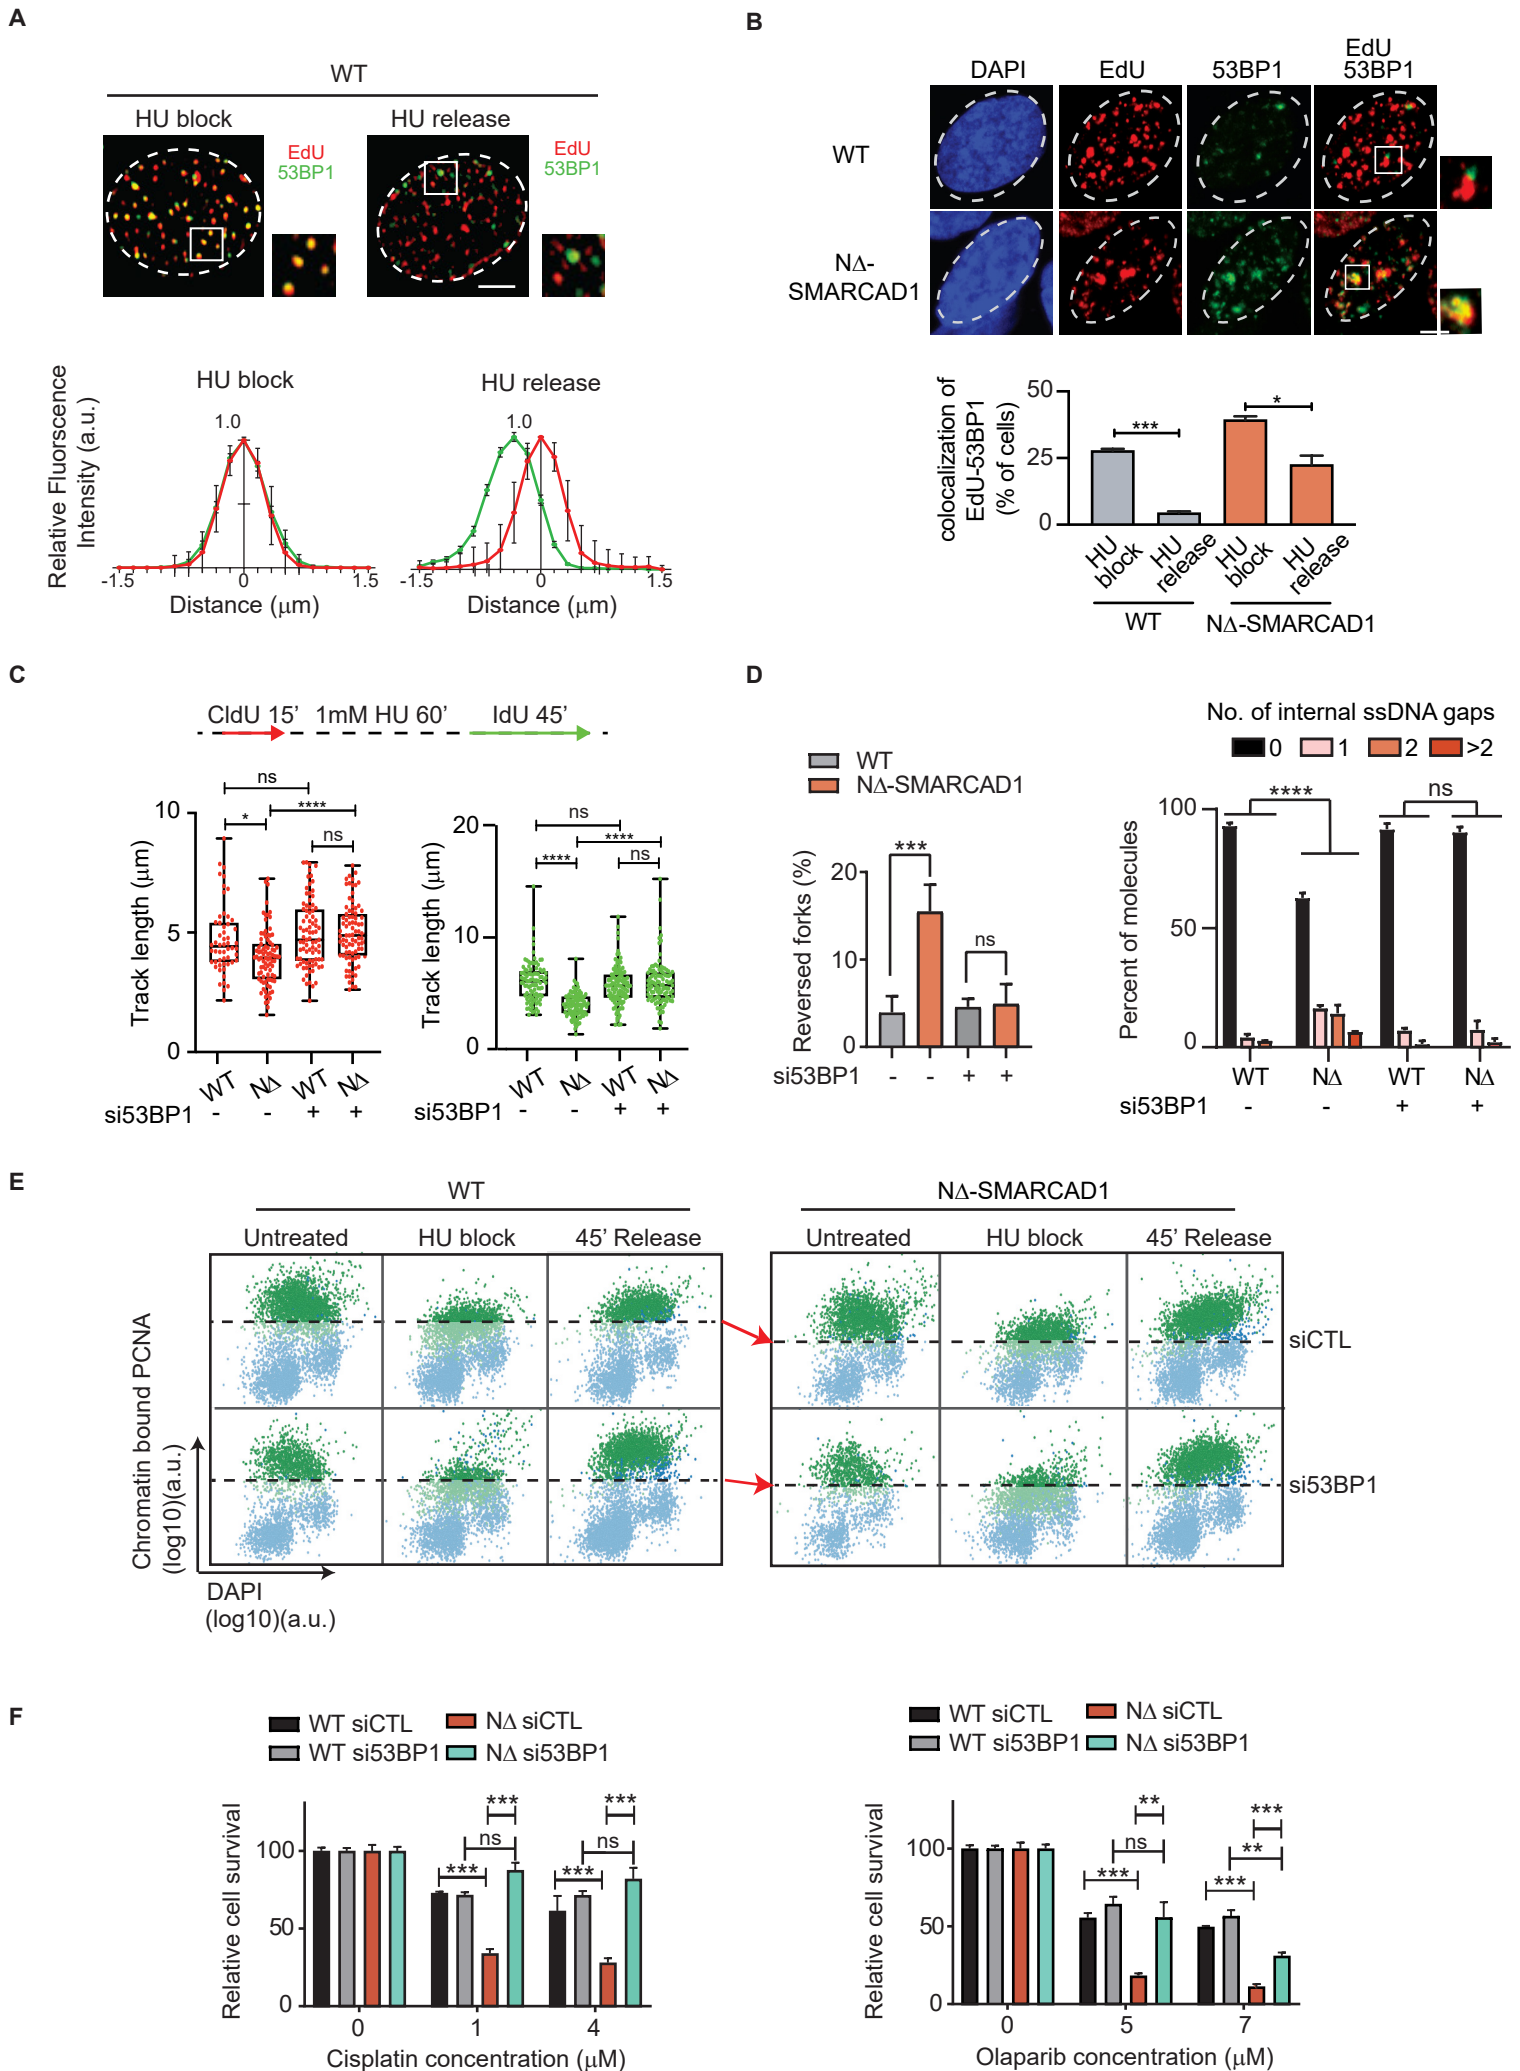

## Figure 6

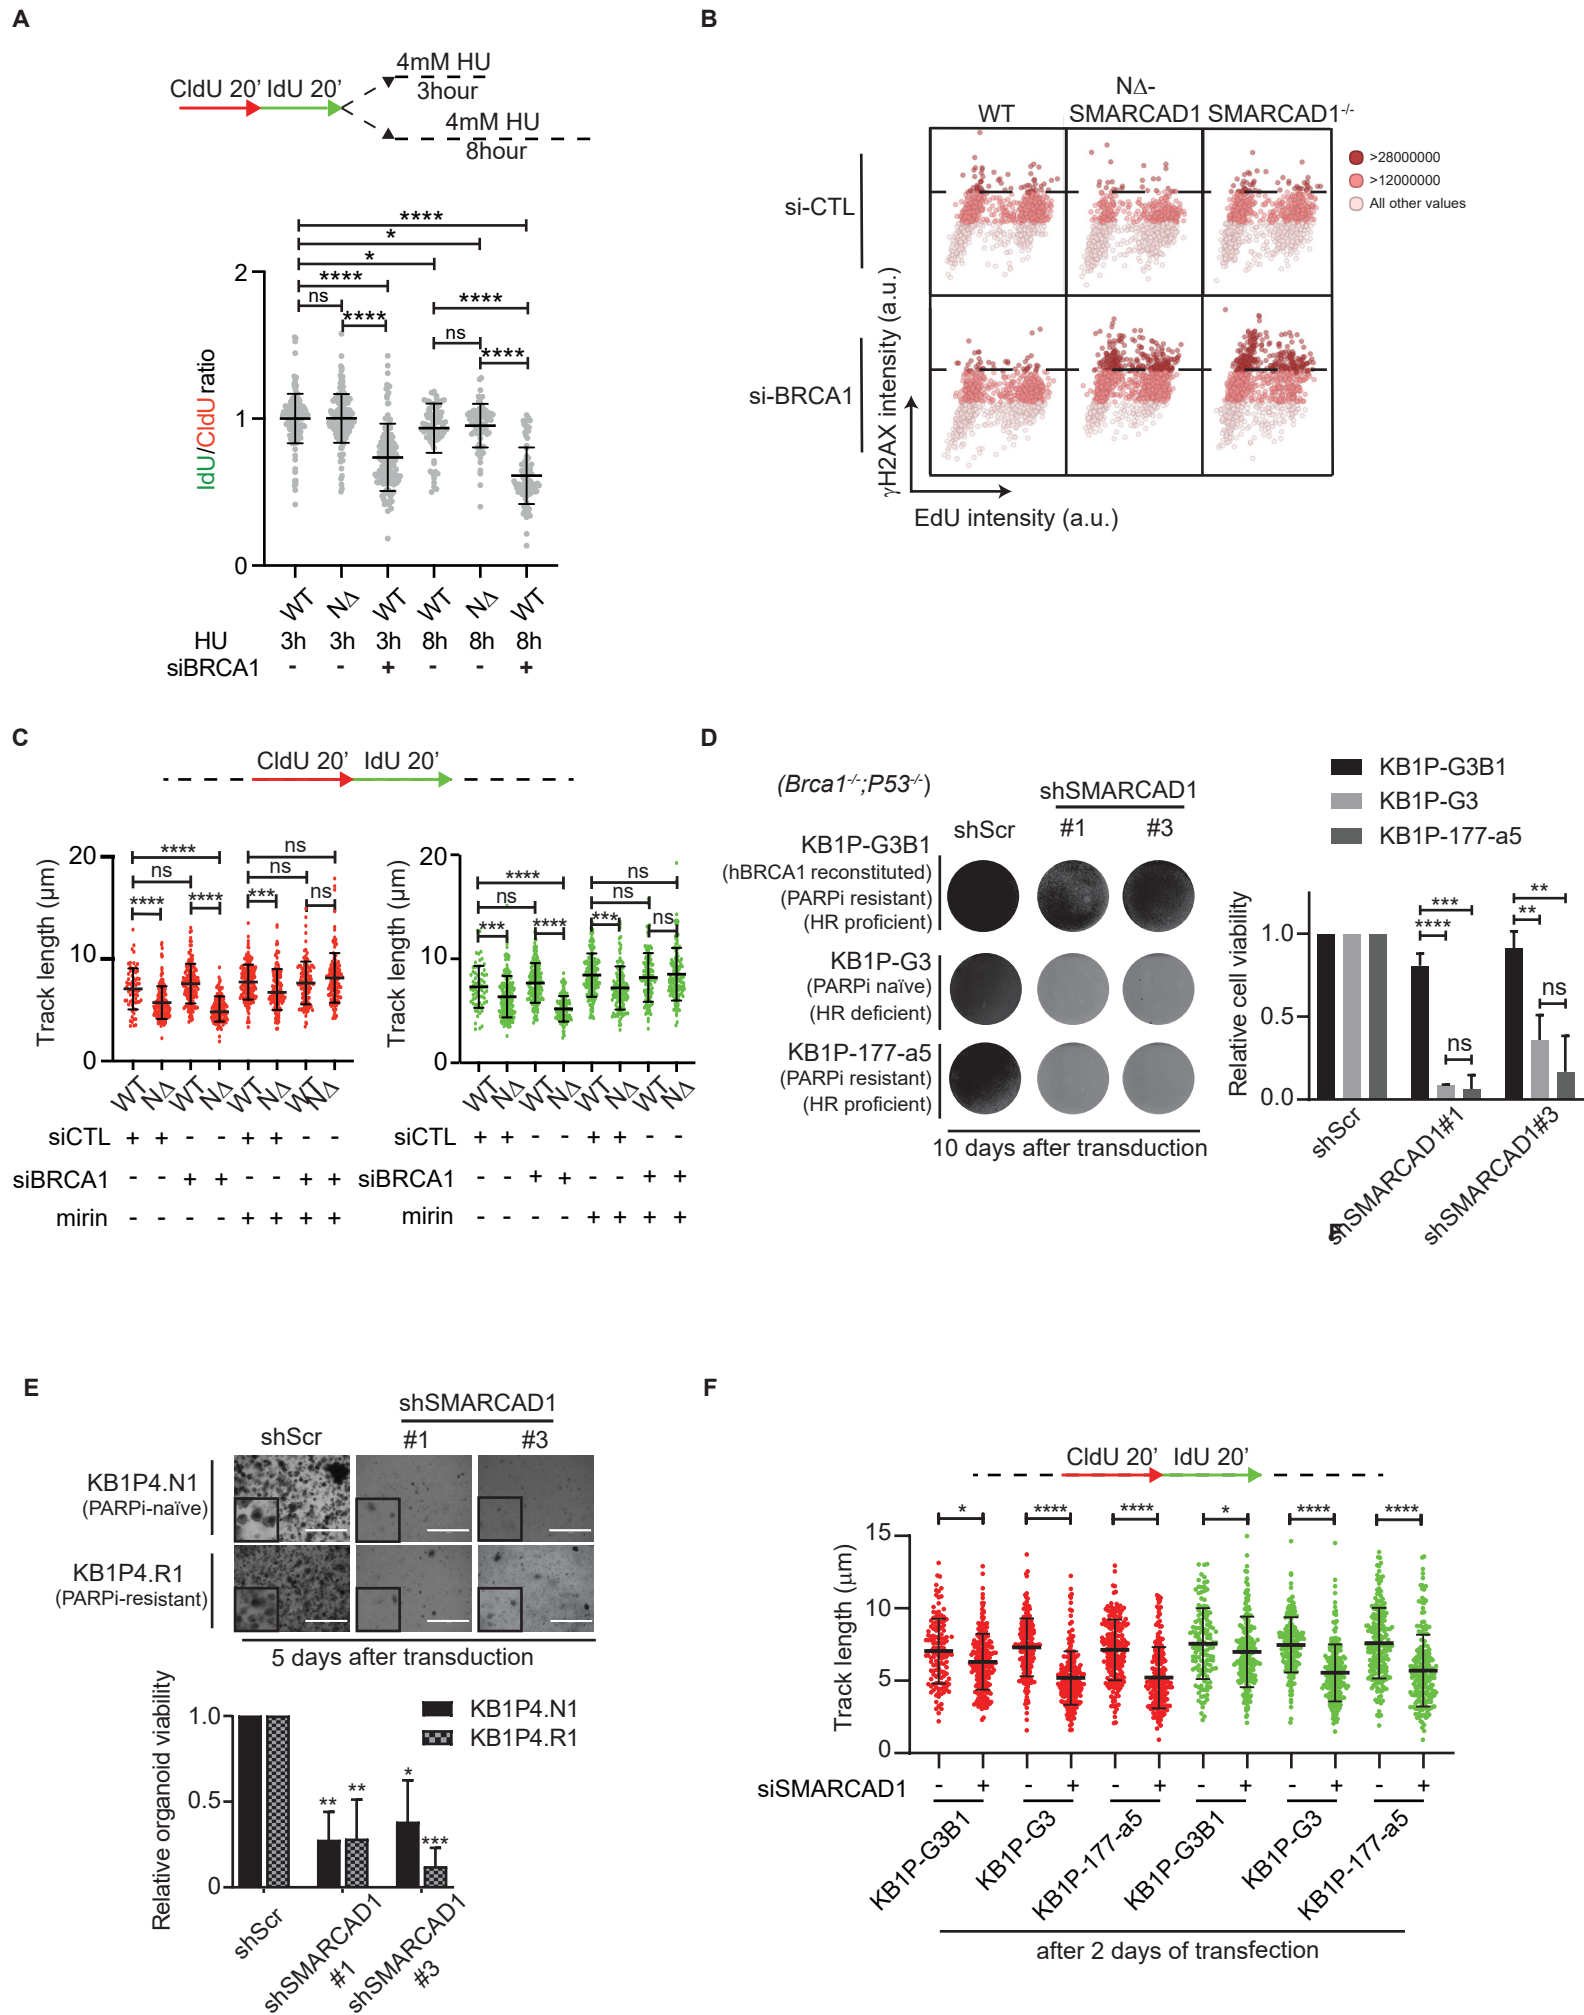

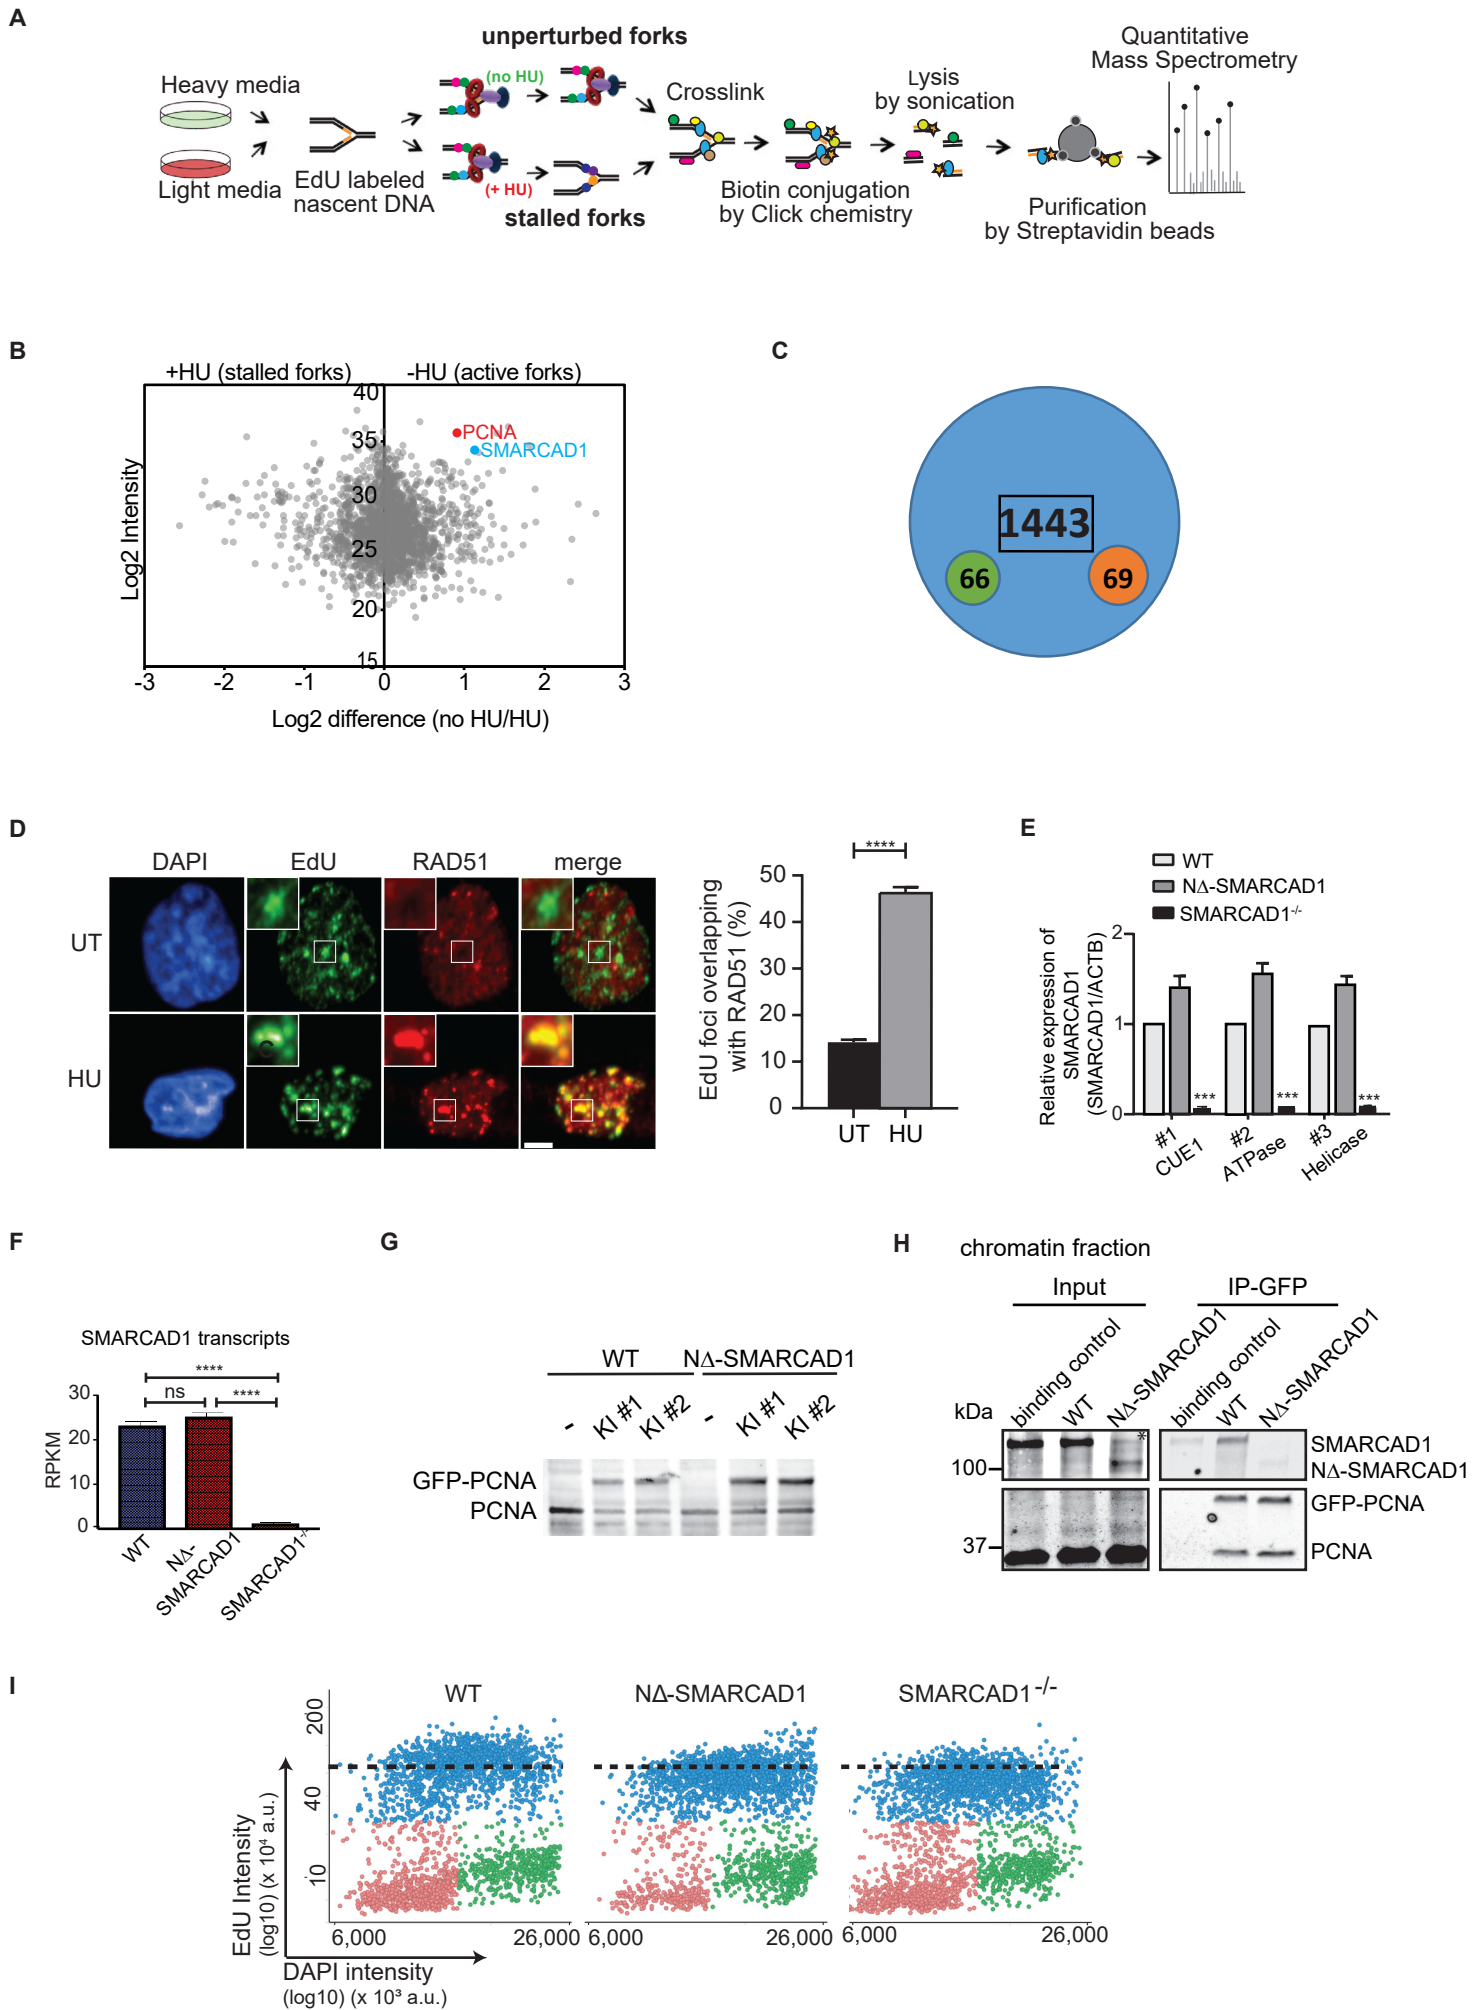

**Figure S1. iPOND reveals that SMARACAD1 unlike RAD51 is enriched at unperturbed forks**

**(A)** Schematic representation of the iPOND-SILAC-MS experiment.

**(B)** Volcano plot showing the distribution of iPOND-SILAC-MS results for average fold-change to identify significantly upregulated proteins in unperturbed conditions based on H:L (no HU: HU) ratio in the SILAC experiment. SMARACAD1 (indicated in blue) and PCNA (indicated in red) show higher enrichment in unperturbed condition.

**(C)** Total number of proteins identified from two independent iPOND-SILAC-MS experiments using mouse ESCs. Green and red circles represent number of proteins upregulated in unperturbed conditions and HU stalled replication forks respectively.

**(D)** (Left) Representative images showing the co-localization of RAD51 (red) to sites of DNA replication as marked by EdU (green) in the presence or absence of HU in human fibroblast MRC5 cells using high-content microscopy (scale bar = 5 $\mu$ m). (Right) Bar chart representing the percentage of EdU foci colocalizing with RAD51 in untreated and 3 hour 4mM HU block condition. (\*\*\*\* $P \leq 0.0001$ , unpaired t-test).

**(E)** Transcript levels of SMARACAD1 relative to ACTB in WT,  $N\Delta$ -SMARACAD1 and SMARACAD1<sup>-/-</sup> are determined by qRT-PCR and shown as the mean + S.D. (n=3). The normalized value of expression in WT for each primer pair #1, #2 and #3 designed for the exons spanning CUE1, ATPase and Helicase domain, respectively is set to 1.

**(F)** Quantification of SMARACAD1 transcript using transcriptome analysis in WT,  $N\Delta$ -SMARACAD1 and SMARACAD1<sup>-/-</sup> cells. (n=2)

**(G)** Immunoblot showing the GFP-PCNA and PCNA in heterozygous GFP-tagged PCNA knock-in

**(KI)** MRC5 WT and  $N\Delta$ -SMARACAD1 cells.

**(H)** Crosslinked immunoprecipitation of GFP-tagged PCNA expressing endogenously in WT and  $N\Delta$ -SMARACAD1 cells, using GFP antibody. Western blot analysis was performed using antibodies against PCNA and SMARACAD1. The failure to detect GFP-PCNA band by mouse monoclonal (PC10) antibody mainly in inputs of crosslinked-IP conditions is possibly due to epitope masking under distinct buffer compositions in contrast to IP conditions. The GFP-PCNA band can be easily detected using this antibody in the whole cell extracts prepared in RIPA buffer, as shown in Fig. S1G.

**(I)** Quantitative image-based cytometry single-cell analysis (QIBC) of EdU labeled WT,  $N\Delta$ -SMARACAD1 and SMARACAD1<sup>-/-</sup> cells. G0-1, S and G2/M phase cells are labeled in red, blue and green respectively. Dotted lines represent the mean EdU intensity in WT S-phase cells.

Figure S2

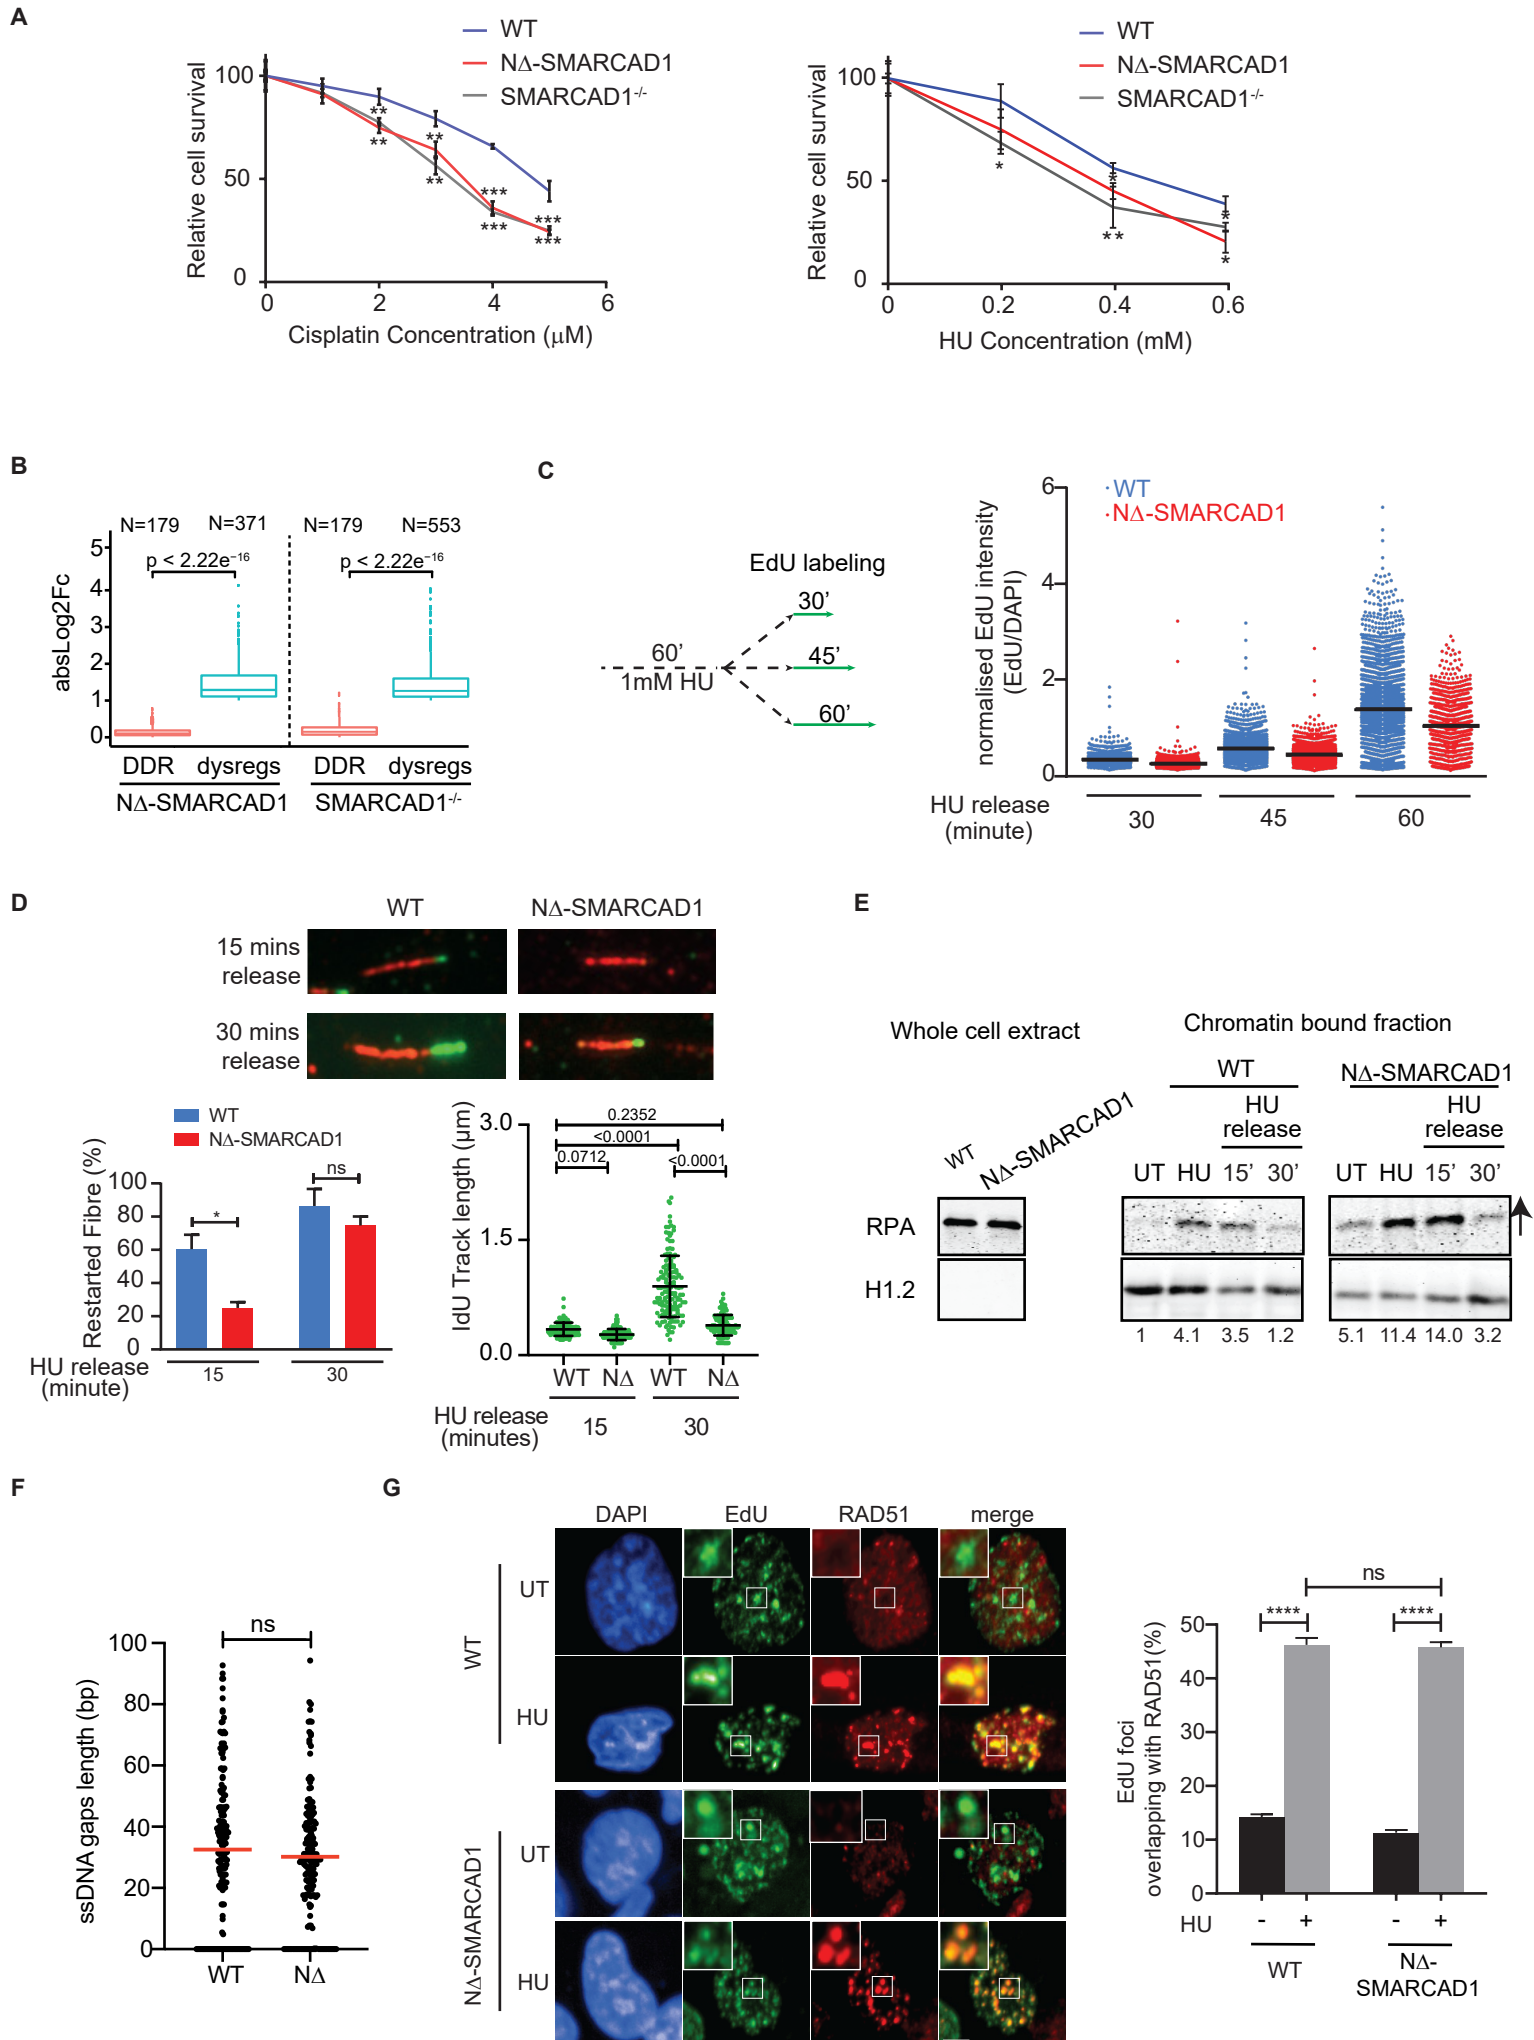

## Figure S2. SMARCAD1 is required for efficient fork restart and genome stability

- (A) Quantification of colony survival assay in WT, N $\Delta$ -SMARCAD1 and SMARCAD1<sup>-/-</sup> cells treated with the indicated concentrations of (left) cisplatin and (right) hydroxyurea. (\*\*\*P  $\leq$  0.001, \*\*P  $\leq$  0.01, \*P  $\leq$  0.05, unpaired t-test)
- (B) Fold change in transcript levels of DNA damage repair (DDR) genes (red) and dysregulated genes (blue) in N $\Delta$ -SMARCAD1 and SMARCAD1<sup>-/-</sup> normalized to WT.
- (C) (Left) Schematic showing the HU release condition with EdU labeling in WT and N $\Delta$ -SMARCAD1 cells. (Right) Quantification of EdU intensity by QIBC in >1000 S-phase cells in the HU release conditions for WT and N $\Delta$ -SMARCAD1 cells. Cells treated with 1mM HU for an hour were released in EdU containing media for the indicated time before fixation.
- (D) Top panel: representative images showing DNA fibre with IdU track after HU release in WT and N $\Delta$ -SMARCAD1 cells. (scale bar = 1 $\mu$ m). Bottom panel: (Left) Bar plot of the percentage of restarted fibres after HU release for 15 and 30 minutes. (\*P  $\leq$  0.05, unpaired t-test). (Right) IdU track length of restarted fibres after HU release for 15 and 30 minutes. (unpaired t-test).
- (E) Immunoblot showing the whole cell extract and chromatin bound fraction of RPA in untreated, HU block and HU release conditions in WT and N $\Delta$ -SMARCAD1 cells. Numbers below indicate the quantification of RPA band after normalisation to the loading control. Arrows indicate the position of omitted well between the lanes.
- (F) Quantification of the length of ssDNA gaps at the fork measured by EM. (n=3) (ns, non-significant, unpaired t-test).
- (G) (Left) Representative images showing the co-localization of RAD51 (red) to sites of DNA replication as marked by EdU (green) in the presence or absence of HU in human fibroblast MRC5 WT and N $\Delta$ -SMARCAD1 cells using high-content microscopy. (scale bar = 5 $\mu$ m). (Right) Quantification of percentage of EdU foci overlapping with RAD51 foci. (\*\*\*\*P  $\leq$  0.0001, ns, non-significant, unpaired t-test)

Figure S3

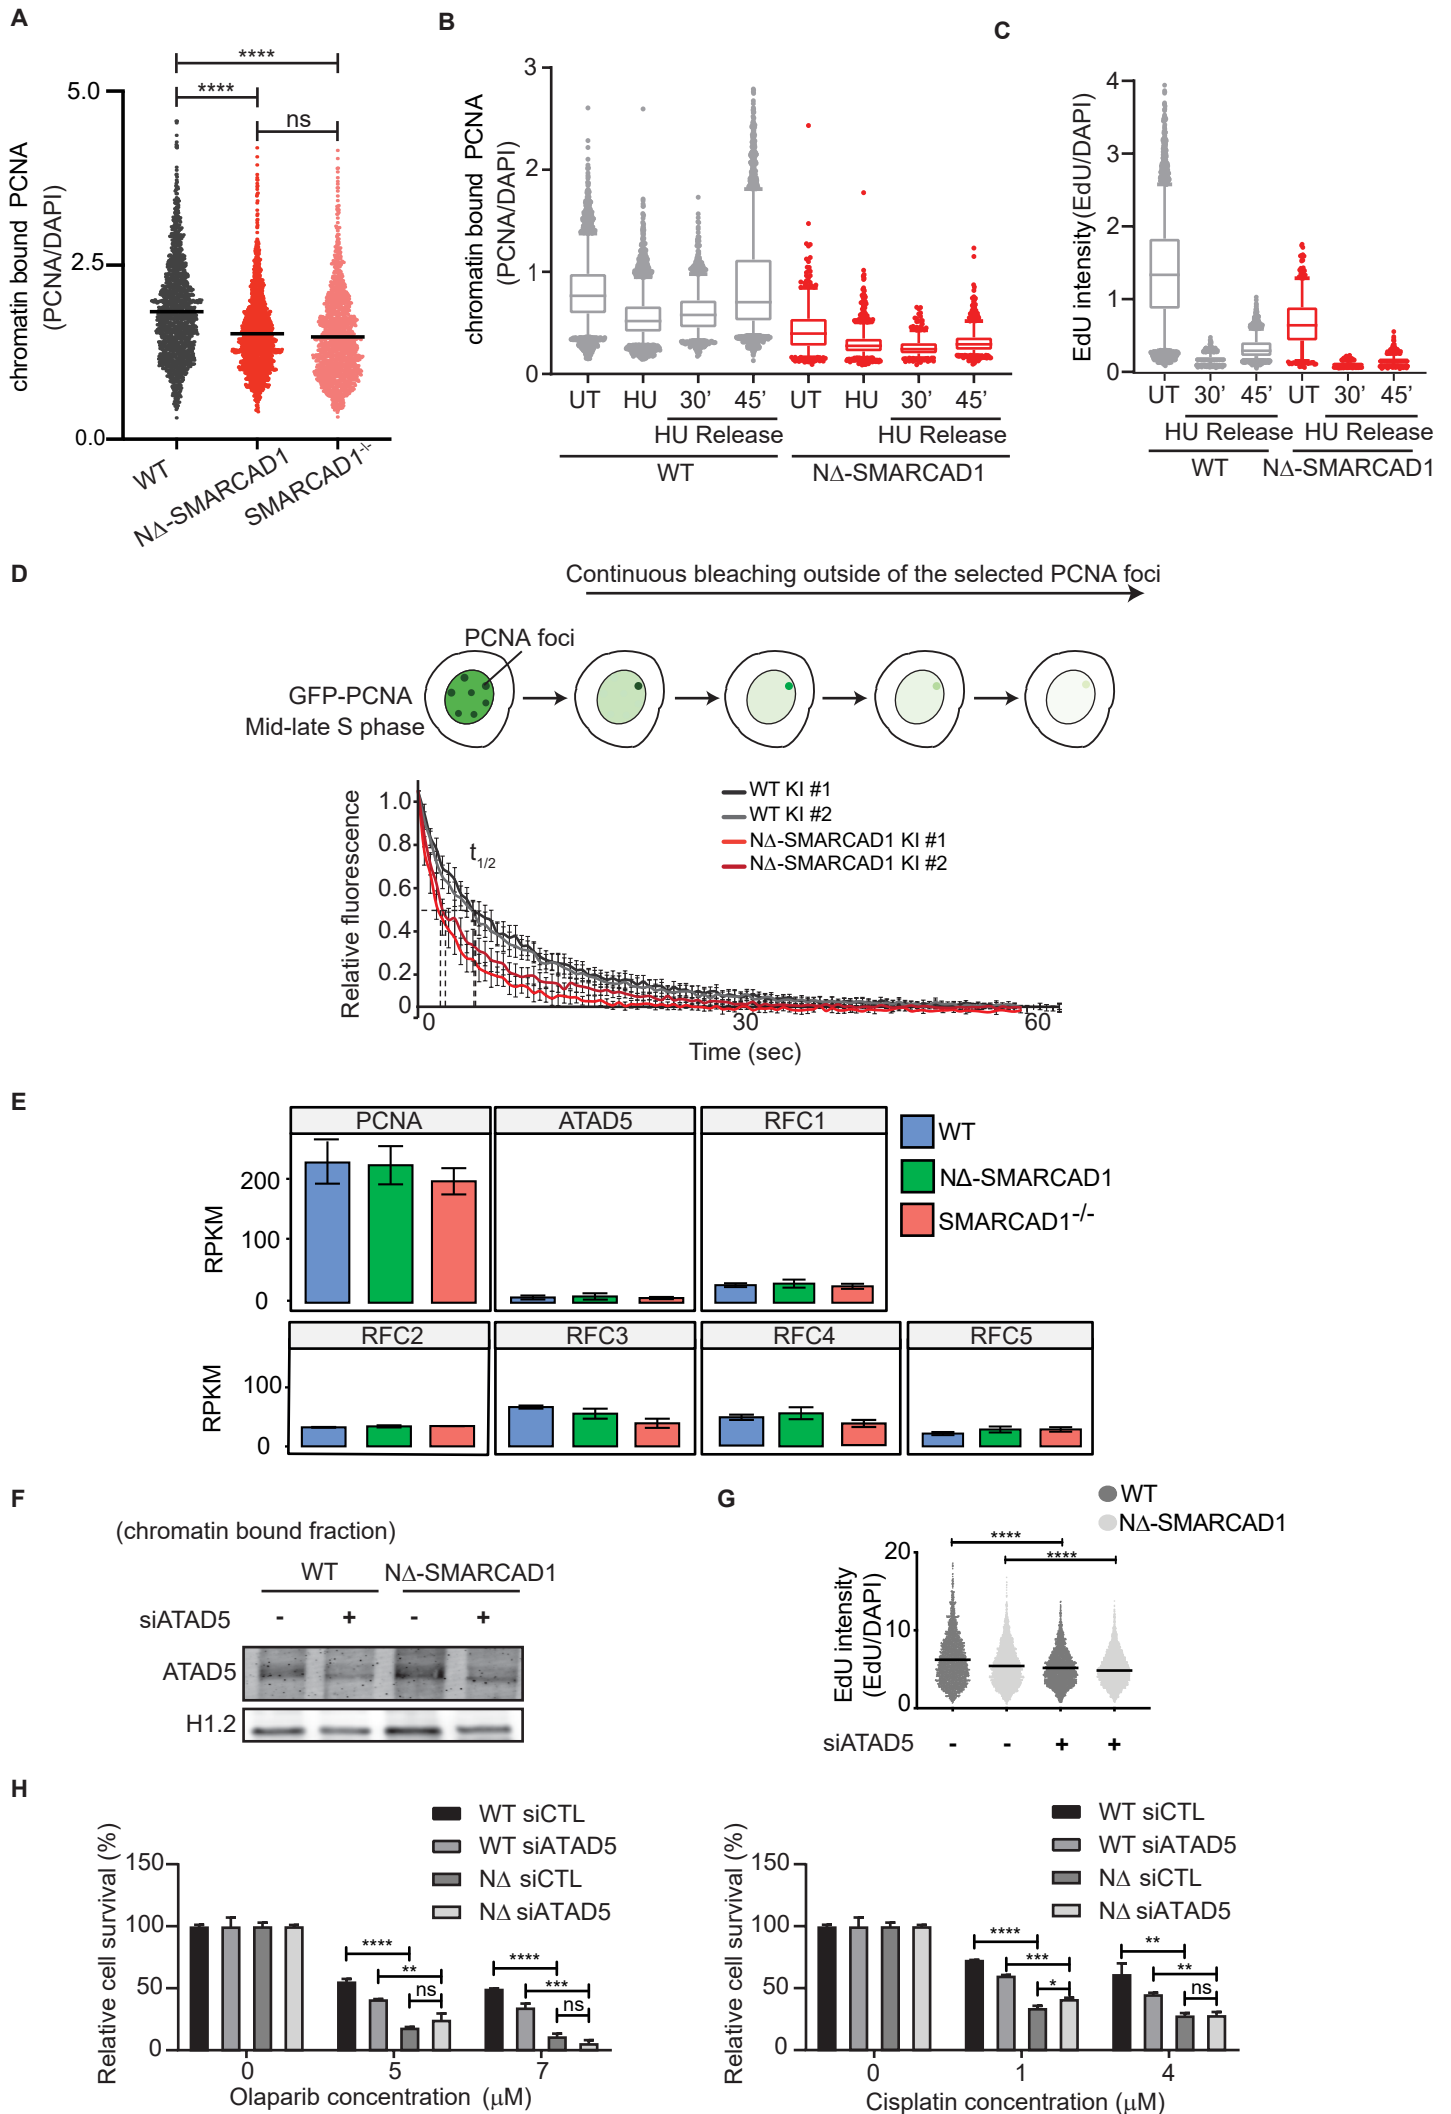

### **Figure S3. SMARCAD1 maintains PCNA level at replication forks**

**(A)** Dotplot of chromatin bound PCNA intensity (normalised to DAPI) in WT, N $\Delta$ -SMARCAD1 and SMARCAD1<sup>-/-</sup> cells. Mean PCNA intensity is indicated.

**(B-C)** Boxplot representation of **(B)**, chromatin bound PCNA intensity (normalised to DAPI) and **(C)** EdU (normalised to DAPI) upon HU treatment in WT, N $\Delta$ -SMARCAD1 cells, corresponding to QIBC analysis shown in Fig. 4C, >1000 S-phase cells were plotted in each condition.

**(D)** Top: Schematic for inverse fluorescence recovery after photobleaching (iFRAP) experiment in GFP-tagged PCNA knock-in (KI) cells. Bottom: sample curves for GFP-PCNA in WT and N $\Delta$ -SMARCAD1 cells from one experiment (n>12 cells for each experiment, with two independent experiments, mean $\pm$ 2xS.E.M.)

**(E)** Quantification of PCNA, ATAD5 and RFC1-5 transcript using transcriptome analysis in WT, N $\Delta$ -SMARCAD1 and SMARCAD1<sup>-/-</sup> cells.

**(F)** Immunoblot showing the chromatin bound ATAD5 level in WT and N $\Delta$ -SMARCAD1 cells treated with control or ATAD5 siRNA.

**(G)** Dotplot of EdU (normalised to DAPI) in WT and N $\Delta$ -SMARCAD1 cells treated with control or ATAD5 siRNA. (\*\*\*\*P  $\leq$  0.0001, unpaired t-test).

**(H)** Quantification of colony survival assay in WT and N $\Delta$ -SMARCAD1 cells treated with control or ATAD5 siRNA and with the indicated concentrations of (left) olaparib and (right) cisplatin. (\*\*\*\*P  $\leq$  0.0001, \*\*\*P  $\leq$  0.001, \*\*P  $\leq$  0.01, \*P  $\leq$  0.05, ns, non-significant, unpaired t-test).



## Figure S4

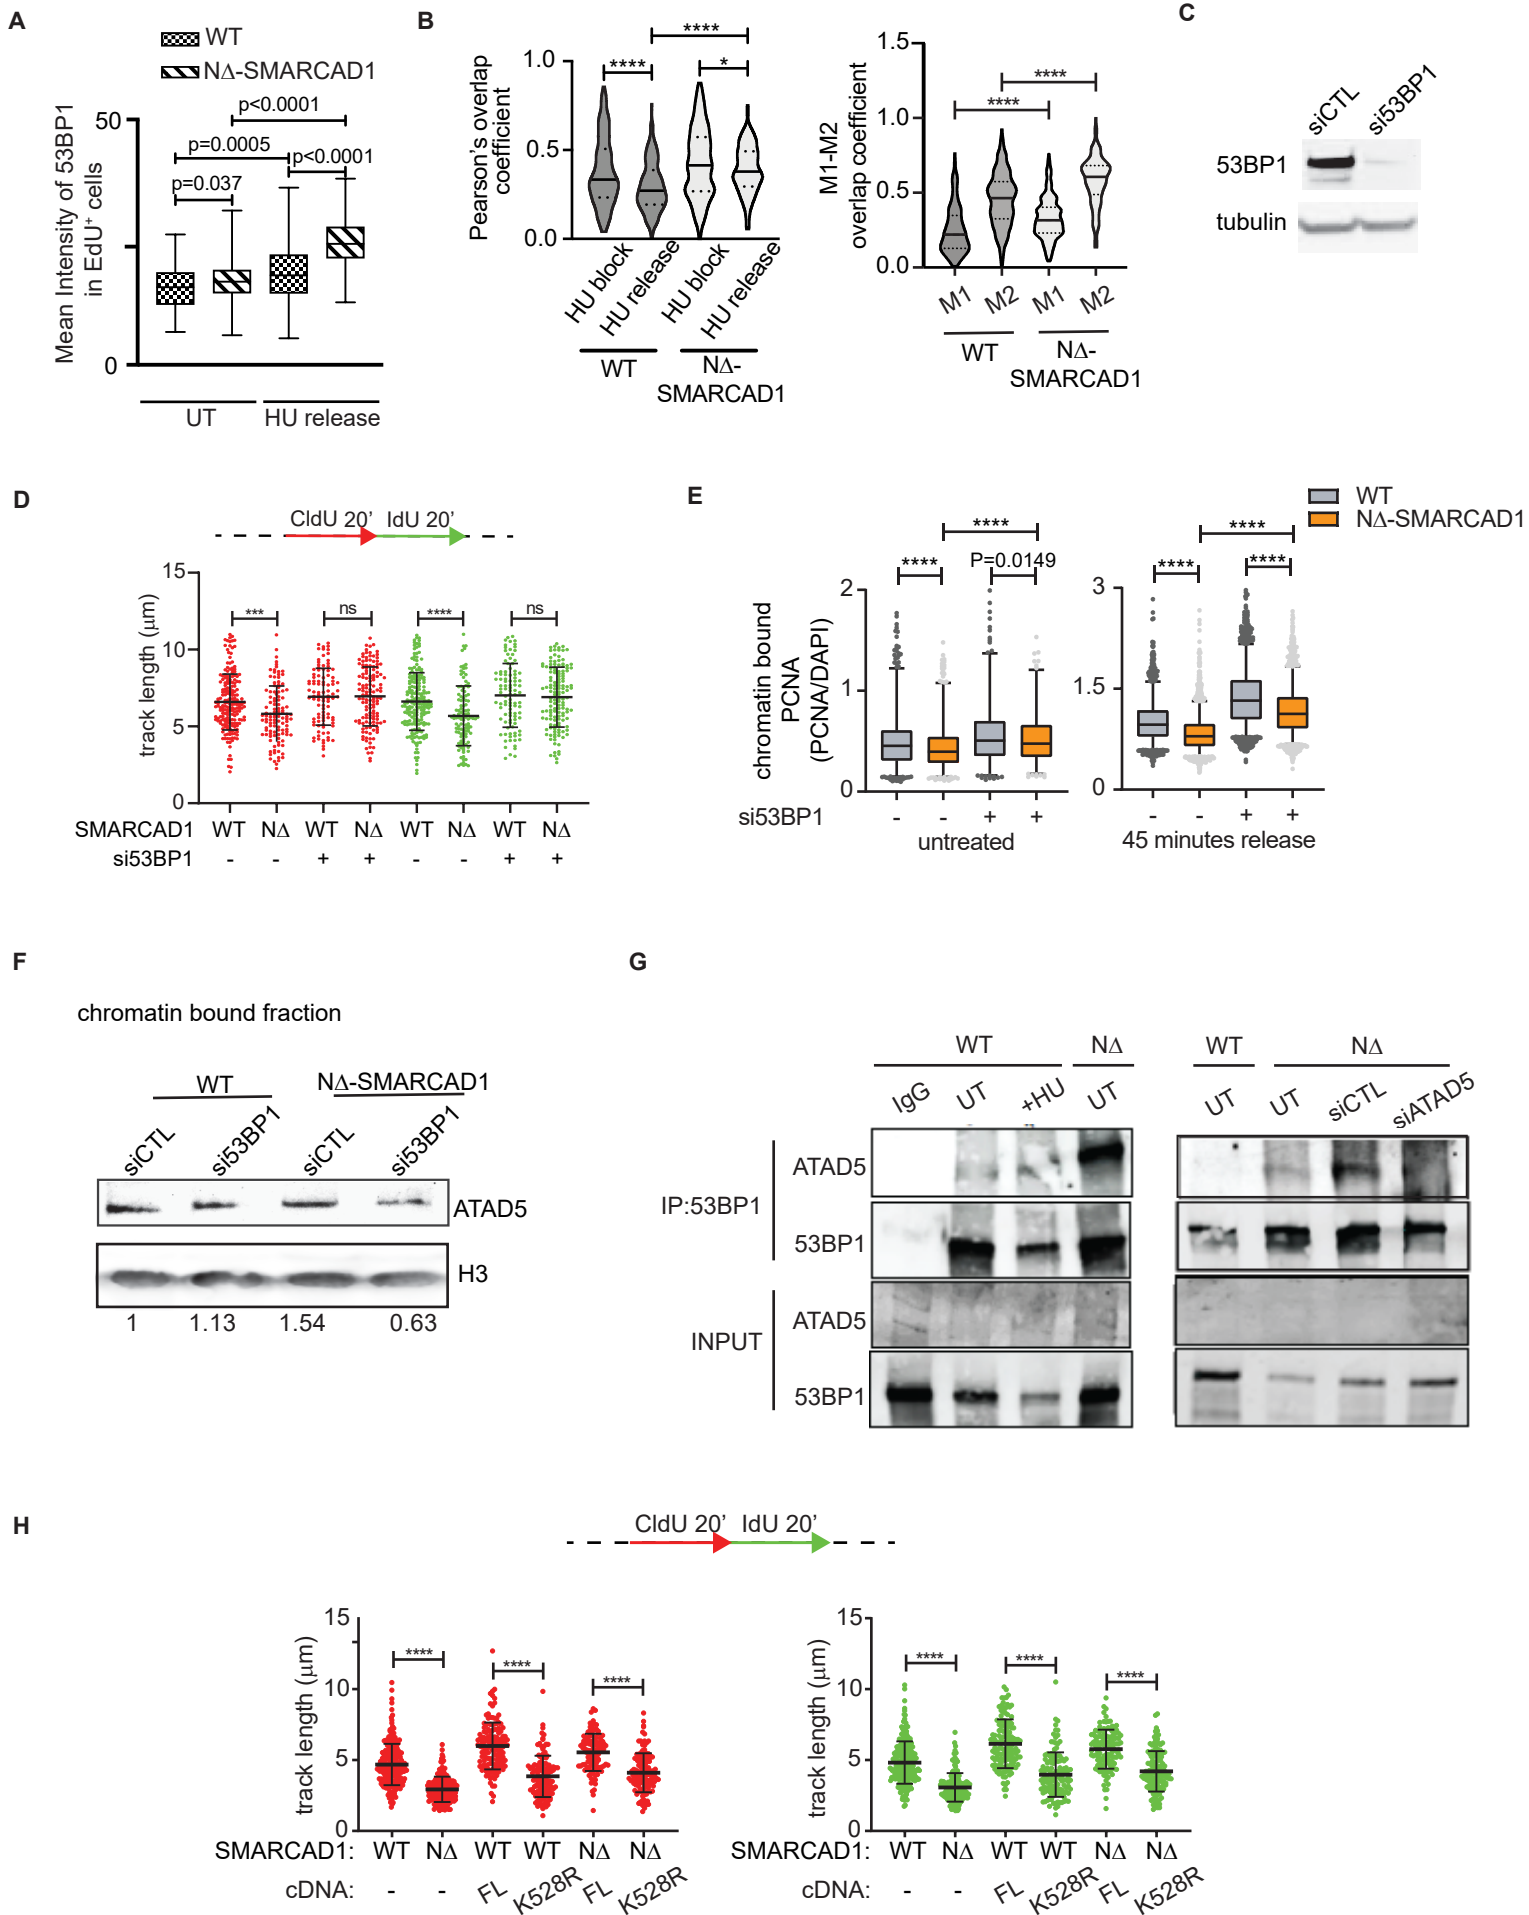

## Figure S4. SMARCAD1 precludes 53BP1 enrichment at forks to maintain PCNA levels and facilitate fork progression

- (A) Boxplot showing mean intensity of 53BP1 in EdU positive WT and  $\Delta$ -SMARCAD1 cells in untreated condition and 60 minutes after release from HU treatment (4mM HU for 3 hour).
- (B) Left: Pearson's overlap coefficient between 53BP1 and EdU in WT and  $\Delta$ -SMARCAD1 cells in HU block condition and 60 minutes release after HU treatment (4mM HU for 3 hour). Right: Manders' M1-M2 overlap coefficients between 53BP1 and EdU in WT and  $\Delta$ -SMARCAD1 cells after 60 minutes release from HU treatment (4mM HU for 3 hour). (\*\*\*\* $P \leq 0.0001$ , \* $P \leq 0.05$ , unpaired t-test)
- (C) Immunoblot showing the 53BP1 level in WT cells treated with control or 53BP1 siRNA.
- (D) Top: Schematic for replication fork progression assay with CldU and IdU labeling. Bottom: CldU (red) and IdU (green) track length ( $\mu\text{m}$ ) distribution for the indicated conditions. (\*\* $P \leq 0.001$ , \*\*\*\* $P \leq 0.0001$ , ns, non-significant, Kruskal-wallis followed with Dunn's multiple comparison test,  $n = 3$  independent experiments with similar outcomes.)
- (E) Boxplot showing the intensity of chromatin bound PCNA in EdU positive cells of WT and  $\Delta$ -SMARCAD1 in (left) untreated condition and (right) 45 minutes after release from HU treatment (1mM for 1hour), corresponding to QIBC analysis shown in Fig. 5E. (\*\*\*\* $P \leq 0.0001$ , unpaired t-test)
- (F) Immunoblot showing the chromatin bound fraction of ATAD5 levels in WT and  $\Delta$ -SMARCAD1 cells upon si-control and si-53BP1 conditions. H3 is used as a loading control. The numbers below the blots show the fold change of ATAD5 after normalisation with H3 relative to WT.
- (G) Crosslinked immunoprecipitation of WT and  $\Delta$ -SMARCAD1 cells with the indicated conditions, using 53BP1 antibody. Western blot analysis was performed using antibodies against ATAD5 and 53BP1.
- (H) Top Panel: Schematic for replication fork progression assay with CldU and IdU labeling. Bottom panel: CldU (red) and IdU (green) track length ( $\mu\text{m}$ ) distribution in cells with/without full length (FL) and K528R ATPase dead cDNA-SMARCAD1 knock-in in WT and  $\Delta$ -SMARCAD1 cells. (\*\*\*\* $P \leq 0.0001$  Kruskal-wallis followed with Dunn's multiple comparison test,  $n = 3$  independent experiments with similar outcomes)

A

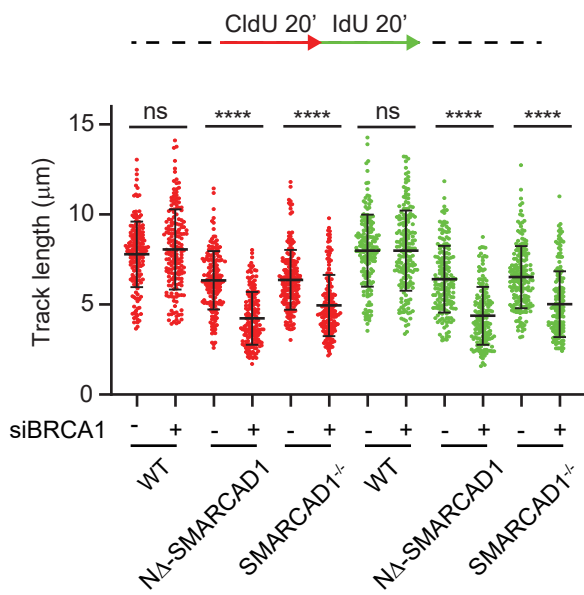

B

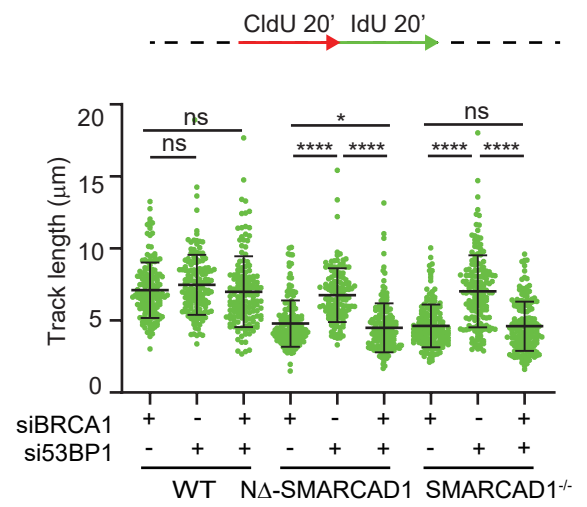

C

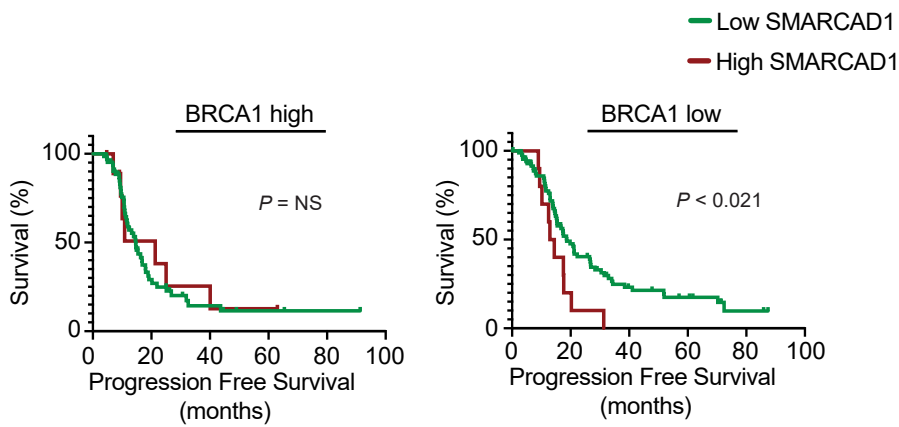

D

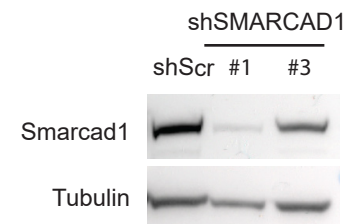

E

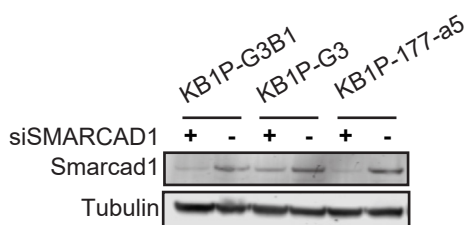

F

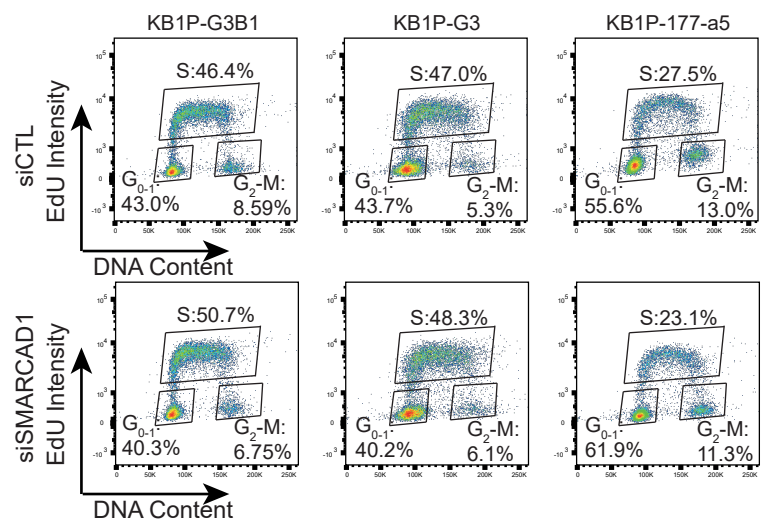

**Figure S5. Smarcad1 is essential for proliferation of BRCA1 deficient mouse tumor cells**

(A) Top: Schematic for replication fork progression assay with CldU and IdU labeling. Bottom: Fork progression assay showing the CldU (red) and IdU (green) track length ( $\mu\text{m}$ ) distribution for WT,  $\Delta$ -SMARCAD1 and SMARCAD1<sup>-/-</sup> cells treated with si-control or si-BRCA1. (\*\*\*\* $P \leq 0.0001$ , ns, non-significant, Kruskal-wallis followed with Dunn's multiple comparison test, n= 3 independent experiments with similar outcomes).

(B) Top: Schematic for replication fork progression assay with CldU and IdU labeling. Bottom: Fork progression assay showing the IdU (green) track length ( $\mu\text{m}$ ) distribution for WT,  $\Delta$ -SMARCAD1 and SMARCAD1<sup>-/-</sup> cells treated with si-control, si-BRCA1, si-53BP1 or both si-BRCA1 and si-53BP1. (\*\*\*\* $P \leq 0.0001$ , \* $P \leq 0.05$ , ns, non-significant, Kruskal-wallis followed with Dunn's multiple comparison test, n= 3 independent experiments with similar outcomes).

(C) Progression-free survival after platinum chemotherapy of ovarian carcinoma TCGA patients with either BRCA1-high or BRCA1-low expression.

(D) Immunoblot showing the Smarcad1 level in KB1P (Brca1<sup>-/-</sup>; P53<sup>-/-</sup>) tumor cells treated with control (scramble) or two shRNAs (#1 and #3) against Smarcad1.

(E) Immunoblot showing the Smarcad1 level in KB1P (Brca1<sup>-/-</sup>; P53<sup>-/-</sup>) tumor cells after two days of transfection with FLUC (si-control) or si-SMARCAD1.

(F) Cell cycle profile of KB1P (Brca1<sup>-/-</sup>; P53<sup>-/-</sup>) tumor cells shown in (E).

**Figure S6**

*Wildtype*

"Fork integrity"

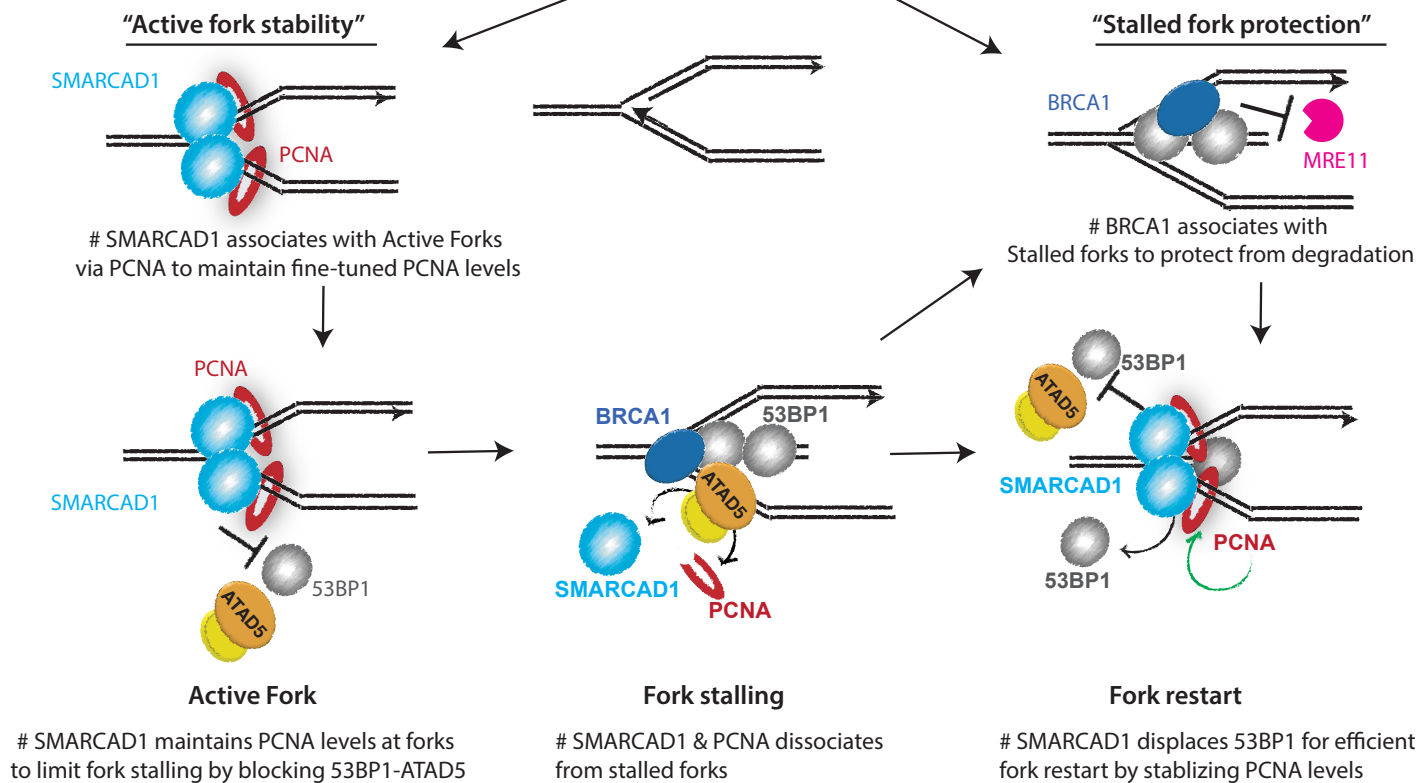

In unperturbed conditions

| <i>SMARCAD1</i> <sup>-/-</sup>                                                                                                                                                                                                        | <i>SMARCAD1</i> <sup>-/-</sup> <i>53BP1</i> <sup>-/-</sup>                                                                                                                                                               | <i>SMARCAD1</i> <sup>-/-</sup> <i>BRCA1</i> <sup>-/-</sup><br><i>53BP1</i> <sup>-/-</sup> Or <i>53BP1</i> <sup>+/+</sup>                                                                                                     | <i>BRCA1</i> <sup>-/-</sup>                                                                                                      |
|---------------------------------------------------------------------------------------------------------------------------------------------------------------------------------------------------------------------------------------|--------------------------------------------------------------------------------------------------------------------------------------------------------------------------------------------------------------------------|------------------------------------------------------------------------------------------------------------------------------------------------------------------------------------------------------------------------------|----------------------------------------------------------------------------------------------------------------------------------|
|                                                                                                                                                                                                                                       |                                                                                                                                                                                                                          |                                                                                                                                                                                                                              |                                                                                                                                  |
| ↑ Stalled forks BUT protected                                                                                                                                                                                                         | ↑ Efficiently restarted forks                                                                                                                                                                                            | ↑ Degraded Forks                                                                                                                                                                                                             | ↓ Stalled forks BUT ↑ Active forks                                                                                               |
|                                                                                                                                                                                                                                       |                                                                                                                                                                                                                          |                                                                                                                                                                                                                              |                                                                                                                                  |
| <p>Unscheduled ATAD5-53BP1 accumulation at fork</p> <p>enhanced PCNA unloading causing frequent fork stalling;</p> <p>poor PCNA recovery causing inefficient fork restart</p> <p>ssDNA accumulation leading to Genome instability</p> | <p>Loss of 53BP1 restores normal ATAD5 levels</p> <p>PCNA levels restored at fork</p> <p>Forks progress &amp; restart efficiently</p> <p>Genome stability restored (BUT, BRCA1 mediated fork protection is required)</p> | <p>Increased stalled forks accumulation due to loss of SMARCAD1</p> <p>Unprotected stalled forks due to loss of BRCA1</p> <p>MRE11-mediated fork degradation</p> <p>Massive DSB accumulation causing synthetic lethality</p> | <p>Reduced Stalled forks due to fork degradation</p> <p>BUT, SMARCAD1 mediated active fork stability maintains DNA synthesis</p> |

**Figure S6. Schematic model depicting the mechanism of action of SMARCAD1 and BRCA1 in maintaining replication fork integrity**

SMARCAD1 maintains fork progression by regulating the PCNA occupancy at unperturbed replication forks to prevent fork stalling by blocking 53BP1 enrichment. While stalled forks require BRCA1-mediated fork protection when SMARCAD1 is off-loaded, efficient fork restart further requires SMARCAD1 to evict 53BP1 and restore PCNA levels by preventing PCNA unloading by ATAD5-RLC complex. The loss of 53BP1 can restore the PCNA levels, fork stability and genome stability in SMARCAD1-deficient cells. BRCA1 mediated fork protection against Mre11 DNA nuclease is essential to maintain fork progression in the SMARCAD1-deficient cells while SMARCAD1 is essential to maintain fork progression in BRCA1-deficient cells to maintain genome stability and subsequently cell survival.

**Table S1. List of DDR proteins Enriched in unperturbed and HU treated conditions**

| <b>Gene names</b> | <b>Log2 Difference (no HU/HU)</b> |
|-------------------|-----------------------------------|
| Chaf1a            | 2,42023                           |
| Pms2              | 1,89048                           |
| Lig1              | 1,8119                            |
| Exo1              | 1,74871                           |
| Msh6              | 1,54525                           |
| Msh2              | 1,40416                           |
| Msh3              | 1,31259                           |
| Pold1             | 1,30544                           |
| Mlh1              | 1,15828                           |
| Smarcad1          | 1,13083                           |
| Pole              | 1,1073                            |
| Fen1              | 0,95377                           |
| Chek1             | 0,917379                          |
| Pcna              | 0,91082                           |
| Pms1              | 0,890688                          |
| Recql5            | 0,71501                           |
| Nbn               | 0,626958                          |
| Rad50             | 0,576975                          |
| Mre11a            | 0,506033                          |
| Wrn               | 0,474566                          |
| Fan1              | 0,448368                          |
| Mnat1             | 0,366338                          |
| Ccnh              | 0,354858                          |
| Faap24            | 0,329181                          |
| Hltf              | 0,315798                          |
| Mpg               | 0,300193                          |
| Cdk7              | 0,291255                          |
| Fancm             | 0,273128                          |
| Gtf2h3            | 0,258117                          |
| Tdp2              | 0,231521                          |
| Ube2n             | 0,16642                           |
| Tdp1              | 0,13104                           |
| Recql             | 0,114918                          |
| Ercc1             | 0,10872                           |
| Xab2              | 0,092735                          |
| Gtf2h1            | 0,0571749                         |
| Prpf19            | 0,0368217                         |
| Parp2             | 0,0294454                         |
| H2afx             | -0,0177651                        |
| Ercc4             | -0,0363669                        |
| Gtf2h2            | -0,0892042                        |
| Rad51c            | -0,116145                         |
| Apex1             | -0,123457                         |
| Ercc3             | -0,17052                          |
| Pnkp              | -0,173763                         |
| Ddb1              | -0,186076                         |

|         |           |
|---------|-----------|
| Parp1   | -0,187312 |
| Xrcc6   | -0,203296 |
| Aptx    | -0,218192 |
| Xrcc5   | -0,225185 |
| Lig3    | -0,303781 |
| Mgmt    | -0,303864 |
| Shprh   | -0,319513 |
| Xrcc1   | -0,33256  |
| Xrcc3   | -0,352318 |
| Polb    | -0,390366 |
| Aplf    | -0,398475 |
| Rad18   | -0,446759 |
| Rnf4    | -0,475405 |
| Prkdc   | -0,49849  |
| Rnf168  | -0,502738 |
| Gtf2h4  | -0,514713 |
| Ung     | -0,56248  |
| Brca2   | -0,627697 |
| Brip1   | -0,653706 |
| Xpc     | -0,675246 |
| Fance   | -0,76797  |
| Rif1    | -0,863788 |
| Brca1   | -0,912159 |
| Rad17   | -1,02491  |
| Atm     | -1,06807  |
| Fancg   | -1,09247  |
| Blm     | -1,16472  |
| Mdc1    | -1,24621  |
| Rpa3    | -1,24695  |
| Tp53bp1 | -1,30996  |
| Rad54l  | -1,36552  |
| Rpa2    | -1,37924  |
| Fanca   | -1,52068  |
| Fanci   | -1,55653  |
| Hus1    | -1,67634  |
| Rpa1    | -1,71905  |
| Fancd2  | -1,72703  |
| Rad51   | -1,90552  |
| Rad1    | -1,90607  |
| Topbp1  | -1,90954  |
| Atrip   | -2,02025  |
| Atr     | -2,2477   |
| Rad9a   | -2,5638   |



**Table S2: Summary of the DNA Fiber Spread Data Analysis.** Mean, median, SD and SEM are the values for the plots shown in each respective figure. The number of experimental replicates is given in the column # replicates.

| figure # | label | cell line | genotype | cdt        | treatment              | mean ( $\mu\text{m}$ ) | median ( $\mu\text{m}$ ) | SD  | SEM  | # replicates |
|----------|-------|-----------|----------|------------|------------------------|------------------------|--------------------------|-----|------|--------------|
| 3A       | CldU  | MRC5      | WT       | siCTL      | NA                     | 6.3                    | 6.3                      | 1.8 | 0.13 | 3            |
| 3A       | CldU  | MRC5      | ND       | siCTL      | NA                     | 4.0                    | 3.6                      | 1.7 | 0.13 | 3            |
| 3A       | CldU  | MRC5      | KO       | siCTL      | NA                     | 4.0                    | 3.8                      | 1.5 | 0.12 | 3            |
| 3A       | CldU  | MRC5      | WT       | siSMARCAD1 | NA                     | 3.8                    | 3.4                      | 1.5 | 0.11 | 3            |
| 3A       | IdU   | MRC5      | WT       | siCTL      | NA                     | 6.5                    | 6.5                      | 2.1 | 0.15 | 3            |
| 3A       | IdU   | MRC5      | ND       | siCTL      | NA                     | 4.1                    | 3.7                      | 1.8 | 0.13 | 3            |
| 3A       | IdU   | MRC5      | KO       | siCTL      | NA                     | 4.2                    | 4.0                      | 1.6 | 0.12 | 3            |
| 3A       | IdU   | MRC5      | WT       | siSMARCAD1 | NA                     | 3.8                    | 3.5                      | 1.6 | 0.12 | 3            |
| 5C       | CldU  | MRC5      | WT       | siCTL      | NA                     | 4.7                    | 4.4                      | 1.4 | 0.20 | 3            |
| 5C       | CldU  | MRC5      | ND       | siCTL      | NA                     | 4.0                    | 3.9                      | 1.2 | 0.12 | 3            |
| 5C       | CldU  | MRC5      | WT       | si53BP1    | NA                     | 4.9                    | 4.7                      | 1.4 | 0.15 | 3            |
| 5C       | CldU  | MRC5      | ND       | si53BP1    | NA                     | 5.0                    | 4.9                      | 1.2 | 0.13 | 3            |
| 5C       | IdU   | MRC5      | WT       | siCTL      | release from<br>1mM HU | 5.8                    | 5.9                      | 1.8 | 0.18 | 3            |
| 5C       | IdU   | MRC5      | ND       | siCTL      | release from<br>1mM HU | 3.8                    | 3.8                      | 1.1 | 0.11 | 3            |
| 5C       | IdU   | MRC5      | WT       | si53BP1    | release from<br>1mM HU | 5.5                    | 5.5                      | 1.7 | 0.16 | 3            |
| 5C       | IdU   | MRC5      | ND       | si53BP1    | release from<br>1mM HU | 5.7                    | 5.5                      | 2.0 | 0.19 | 3            |
| 6C       | CldU  | MRC5      | WT       | siCTL      | DMSO                   | 7.1                    | 7.0                      | 2.0 | 0.25 | 3            |
| 6C       | CldU  | MRC5      | ND       | siCTL      | DMSO                   | 5.7                    | 5.4                      | 1.6 | 0.12 | 3            |
| 6C       | CldU  | MRC5      | WT       | siBRCA1    | DMSO                   | 7.6                    | 7.6                      | 1.9 | 0.16 | 3            |
| 6C       | CldU  | MRC5      | ND       | siBRCA1    | DMSO                   | 5.1                    | 5.0                      | 1.2 | 0.11 | 3            |
| 6C       | CldU  | MRC5      | WT       | siCTL      | mirin                  | 7.7                    | 7.6                      | 1.7 | 0.13 | 3            |
| 6C       | CldU  | MRC5      | ND       | siCTL      | mirin                  | 7.0                    | 6.7                      | 2.0 | 0.18 | 3            |
| 6C       | CldU  | MRC5      | WT       | siBRCA1    | mirin                  | 7.6                    | 7.6                      | 2.1 | 0.20 | 3            |
| 6C       | CldU  | MRC5      | ND       | siBRCA1    | mirin                  | 8.1                    | 7.9                      | 2.4 | 0.22 | 3            |
| 6C       | IdU   | MRC5      | WT       | siCTL      | DMSO                   | 7.3                    | 7.1                      | 2.0 | 0.25 | 3            |
| 6C       | IdU   | MRC5      | ND       | siCTL      | DMSO                   | 6.4                    | 6.1                      | 2.0 | 0.15 | 3            |
| 6C       | IdU   | MRC5      | WT       | siBRCA1    | DMSO                   | 7.7                    | 7.6                      | 1.9 | 0.16 | 3            |
| 6C       | IdU   | MRC5      | ND       | siBRCA1    | DMSO                   | 5.2                    | 5.1                      | 1.2 | 0.11 | 3            |
| 6C       | IdU   | MRC5      | WT       | siCTL      | mirin                  | 8.4                    | 8.2                      | 2.1 | 0.16 | 3            |
| 6C       | IdU   | MRC5      | ND       | siCTL      | mirin                  | 7.2                    | 7.0                      | 2.1 | 0.18 | 3            |
| 6C       | IdU   | MRC5      | WT       | siBRCA1    | mirin                  | 8.2                    | 8.1                      | 2.3 | 0.22 | 3            |
| 6C       | IdU   | MRC5      | ND       | siBRCA1    | mirin                  | 8.5                    | 8.0                      | 2.5 | 0.23 | 3            |
| 6C       |       |           |          |            |                        |                        |                          |     |      |              |
| 6F       | CldU  | KB1P      | G3       | siCTL      | NA                     | 7.1                    | 7.2                      | 2.1 | 0.15 | 3            |
| 6F       | CldU  | KB1P      | G3B1     | siCTL      | NA                     | 7.0                    | 6.9                      | 2.2 | 0.19 | 3            |
| 6F       | CldU  | KB1P      | 177-a5   | siCTL      | NA                     | 7.3                    | 7.4                      | 2.0 | 0.14 | 3            |
| 6F       | CldU  | KB1P      | G3       | siSMARCAD1 | NA                     | 5.2                    | 4.9                      | 2.1 | 0.15 | 3            |
| 6F       | CldU  | KB1P      | G3B1     | siSMARCAD1 | NA                     | 6.3                    | 6.2                      | 1.9 | 0.13 | 3            |
| 6F       | CldU  | KB1P      | 177-a5   | siSMARCAD1 | NA                     | 5.2                    | 5.0                      | 1.8 | 0.12 | 3            |
| 6F       | IdU   | KB1P      | G3       | siCTL      | NA                     | 7.6                    | 7.4                      | 2.4 | 0.17 | 3            |
| 6F       | IdU   | KB1P      | G3B1     | siCTL      | NA                     | 7.6                    | 7.5                      | 2.4 | 0.21 | 3            |
| 6F       | IdU   | KB1P      | 177-a5   | siCTL      | NA                     | 7.5                    | 7.5                      | 1.9 | 0.14 | 3            |
| 6F       | IdU   | KB1P      | G3       | siSMARCAD1 | NA                     | 5.7                    | 5.3                      | 2.5 | 0.17 | 3            |
| 6F       | IdU   | KB1P      | G3B1     | siSMARCAD1 | NA                     | 7.0                    | 6.8                      | 2.4 | 0.16 | 3            |
| 6F       | IdU   | KB1P      | 177-a5   | siSMARCAD1 | NA                     | 5.5                    | 5.4                      | 2.0 | 0.13 | 3            |
| S4D      | CldU  | MRC5      | WT       | siCTL      | NA                     | 6.6                    | 6.4                      | 1.8 | 0.13 | 3            |
| S4D      | CldU  | MRC5      | ND       | siCTL      | NA                     | 5.8                    | 5.6                      | 1.8 | 0.17 | 3            |
| S4D      | CldU  | MRC5      | WT       | si53BP1    | NA                     | 6.9                    | 7.0                      | 1.9 | 0.19 | 3            |
| S4D      | CldU  | MRC5      | ND       | si53BP1    | NA                     | 7.0                    | 7.0                      | 1.9 | 0.17 | 3            |
| S4D      | IdU   | MRC5      | WT       | siCTL      | NA                     | 6.6                    | 6.5                      | 1.9 | 0.13 | 3            |
| S4D      | IdU   | MRC5      | ND       | siCTL      | NA                     | 5.7                    | 5.5                      | 1.9 | 0.18 | 3            |
| S4D      | IdU   | MRC5      | WT       | si53BP1    | NA                     | 7.0                    | 7.2                      | 2.1 | 0.21 | 3            |

|     |      |      |               |                      |    |     |     |     |      |   |
|-----|------|------|---------------|----------------------|----|-----|-----|-----|------|---|
| S4D | IdU  | MRC5 | ND            | si53BP1              | NA | 6.9 | 7.1 | 2.0 | 0.17 | 3 |
| S4H | CldU | MRC5 | WT            | NA                   | NA | 4.7 | 4.5 | 1.5 | 0.10 | 2 |
| S4H | CldU | MRC5 | ND            | NA                   | NA | 2.9 | 2.9 | 0.9 | 0.07 | 2 |
| S4H | CldU | MRC5 | WT + FL       | NA                   | NA | 6.0 | 6.0 | 1.7 | 0.14 | 2 |
| S4H | CldU | MRC5 | WT +<br>K528R | NA                   | NA | 3.9 | 3.6 | 1.5 | 0.13 | 2 |
| S4H | CldU | MRC5 | ND + FL       | NA                   | NA | 5.5 | 5.7 | 1.3 | 0.12 | 2 |
| S4H | CldU | MRC5 | ND +<br>K528R | NA                   | NA | 4.1 | 3.9 | 1.4 | 0.12 | 2 |
| S4H | IdU  | MRC5 | WT            | NA                   | NA | 4.8 | 4.6 | 1.5 | 0.10 | 2 |
| S4H | IdU  | MRC5 | ND            | NA                   | NA | 3.1 | 2.8 | 1.0 | 0.08 | 2 |
| S4H | IdU  | MRC5 | WT + FL       | NA                   | NA | 6.1 | 5.9 | 1.7 | 0.15 | 2 |
| S4H | IdU  | MRC5 | WT +<br>K528R | NA                   | NA | 4.0 | 3.7 | 1.6 | 0.14 | 2 |
| S4H | IdU  | MRC5 | ND + FL       | NA                   | NA | 5.8 | 5.8 | 1.4 | 0.12 | 2 |
| S4H | IdU  | MRC5 | ND +<br>K528R | NA                   | NA | 4.2 | 4.0 | 1.4 | 0.13 | 2 |
| S5A | CldU | MRC5 | WT            | siCTL                | NA | 8.4 | 8.6 | 2.0 | 0.15 | 3 |
| S5A | CldU | MRC5 | WT            | siBRCA1              | NA | 8.7 | 8.6 | 2.4 | 0.18 | 3 |
| S5A | CldU | MRC5 | ND            | siCTL                | NA | 6.8 | 6.8 | 1.7 | 0.13 | 3 |
| S5A | CldU | MRC5 | ND            | siBRCA1              | NA | 4.6 | 4.3 | 1.6 | 0.12 | 3 |
| S5A | CldU | MRC5 | KO            | siCTL                | NA | 6.9 | 6.7 | 1.8 | 0.13 | 3 |
| S5A | CldU | MRC5 | KO            | siBRCA1              | NA | 5.3 | 4.9 | 1.8 | 0.14 | 3 |
| S5A | IdU  | MRC5 | WT            | siCTL                | NA | 8.6 | 8.7 | 2.2 | 0.16 | 3 |
| S5A | IdU  | MRC5 | WT            | siBRCA1              | NA | 8.6 | 8.6 | 2.4 | 0.18 | 3 |
| S5A | IdU  | MRC5 | ND            | siCTL                | NA | 6.9 | 6.7 | 2.0 | 0.15 | 3 |
| S5A | IdU  | MRC5 | ND            | siBRCA1              | NA | 4.7 | 4.5 | 1.7 | 0.13 | 3 |
| S5A | IdU  | MRC5 | KO            | siCTL                | NA | 7.0 | 6.9 | 1.9 | 0.14 | 3 |
| S5A | IdU  | MRC5 | KO            | siBRCA1              | NA | 5.4 | 4.9 | 2.0 | 0.15 | 3 |
| S5B | CldU | MRC5 | WT            | siCTL                | NA | 6.9 | 6.3 | 2.5 | 0.19 | 2 |
| S5B | CldU | MRC5 | WT            | siBRCA1              | NA | 6.9 | 6.8 | 1.8 | 0.14 | 2 |
| S5B | CldU | MRC5 | WT            | si53BP1              | NA | 7.4 | 7.1 | 2.2 | 0.18 | 2 |
| S5B | CldU | MRC5 | WT            | siBRCA1 +<br>si53BP1 | NA | 6.5 | 6.2 | 2.3 | 0.18 | 2 |
| S5B | CldU | MRC5 | ND            | siCTL                | NA | 5.5 | 5.3 | 1.7 | 0.12 | 2 |
| S5B | CldU | MRC5 | ND            | siBRCA1              | NA | 4.8 | 4.4 | 1.5 | 0.12 | 2 |
| S5B | CldU | MRC5 | ND            | si53BP1              | NA | 6.4 | 6.2 | 1.7 | 0.14 | 2 |
| S5B | CldU | MRC5 | ND            | siBRCA1 +<br>si53BP1 | NA | 4.4 | 4.0 | 1.7 | 0.13 | 2 |
| S5B | CldU | MRC5 | KO            | siCTL                | NA | 5.3 | 5.0 | 1.5 | 0.12 | 2 |
| S5B | CldU | MRC5 | KO            | siBRCA1              | NA | 4.4 | 4.2 | 1.4 | 0.11 | 2 |
| S5B | CldU | MRC5 | KO            | si53BP1              | NA | 6.9 | 6.8 | 2.3 | 0.17 | 2 |
| S5B | CldU | MRC5 | KO            | siBRCA1 +<br>si53BP1 | NA | 4.5 | 4.2 | 1.6 | 0.12 | 2 |
| S5B | IdU  | MRC5 | WT            | siCTL                | NA | 7.1 | 6.6 | 2.5 | 0.19 | 2 |
| S5B | IdU  | MRC5 | WT            | siBRCA1              | NA | 7.1 | 6.8 | 1.9 | 0.15 | 2 |
| S5B | IdU  | MRC5 | WT            | si53BP1              | NA | 7.5 | 7.2 | 2.1 | 0.17 | 2 |
| S5B | IdU  | MRC5 | WT            | siBRCA1 +<br>si53BP1 | NA | 7.0 | 6.6 | 2.5 | 0.20 | 2 |

**Table S3. siRNA, gRNA, shRNA and primers used in this study**

| siRNA                                                             |                                                                                                                                                                                                                                                                                                                                                                                                                                                                                                                                                                                                                                     |                      |                  |  |
|-------------------------------------------------------------------|-------------------------------------------------------------------------------------------------------------------------------------------------------------------------------------------------------------------------------------------------------------------------------------------------------------------------------------------------------------------------------------------------------------------------------------------------------------------------------------------------------------------------------------------------------------------------------------------------------------------------------------|----------------------|------------------|--|
| Name                                                              | Target Sequence                                                                                                                                                                                                                                                                                                                                                                                                                                                                                                                                                                                                                     | Source               | Catalogue Number |  |
| ON-TARGETplus<br>Non-targeting<br>Control siRNAs                  | N/A                                                                                                                                                                                                                                                                                                                                                                                                                                                                                                                                                                                                                                 | Horizon<br>Discovery | D-001810-01-50   |  |
| ON-TARGETplus<br>Human TP53BP1<br>(7158) siRNA -<br>SMARTpool     | N/A                                                                                                                                                                                                                                                                                                                                                                                                                                                                                                                                                                                                                                 | Horizon<br>Discovery | L-003548-00-0020 |  |
| ON-TARGETplus<br>Human ATAD5<br>(79915) siRNA -<br>SMARTpool      | N/A                                                                                                                                                                                                                                                                                                                                                                                                                                                                                                                                                                                                                                 | Horizon<br>Discovery | L-004738-00-0005 |  |
| ON-TARGETplus<br>Human BRCA1<br>(672) siRNA -<br>SMARTpool        | N/A                                                                                                                                                                                                                                                                                                                                                                                                                                                                                                                                                                                                                                 | Horizon<br>Discovery | L-003461-00-0005 |  |
| ON-TARGETplus<br>Human<br>SMARCD1<br>(56916) siRNA -<br>SMARTpool | N/A                                                                                                                                                                                                                                                                                                                                                                                                                                                                                                                                                                                                                                 | Horizon<br>Discovery | L-013801-00-0005 |  |
| MISSION® esiRNA<br>(negative control in<br>mouse cells)           | GAGCAACTGCATAAGGCTATGAAGAGATACGCCCTGGTTCCTGGAACAATTGCTTTTACAGATGCACATATCGAGGT<br>GGACATCACTTACGCTGAGTACTTCGAAATGTCCGTTCCGTTGGCAGAAGCTATGAAACGATATGGGCTGAATACAA<br>ATCACAGAATCGTCGATGCAGTGAAAACCTCTCTCAATTCTTTATGCCGGTGTGGGCGCGTTATTTATCGGAGTTG<br>CAGTTGCGCCCGCAACGACATTTATAATGAACGTGAATTGCTCAACAGTATGGGCATTTTCGCAGCCTACCGTGGTG<br>TTCGTTTCCAAAAAGGGTTGCAAAAAATTTGAACGTGCAAAAAAGCTCCCAATCATCCAAAAAATTATTATCATGG<br>ATTCTAAAACGGATTACCAGGGATTTAGTTCGATGTACACGTTTCGTCACATCTCATCTACCTCCCGGTTTTAATGAAT<br>ACGATTTTGTGCCAGAGTCCTTCGATAGGGACAAGACAATTGCACTGATCATGAACTCCTCTGGATCTACTGGTCTG<br>CCTAAAGGTGTCGCTCTGCCTCATAGAAGTGCCTGCGTGAGATT | Sigma-Aldrich        | EHUFLUC          |  |
| MISSION® esiRNA<br>targeting mouse<br>Smarcd1<br>sequence         | AACCCTGACCTGATCTTTGAAGACATGGAAGTTATGACAGATTTTGAACACTGACTTTGTAAACAGTATCAACACA<br>TTAATAGTTACCAGTTAGACATGGATTTAATTTTAGATTCGGGAAATCCGAGCCTTAGGATGCATCTTGCTGAGTT<br>GAAACAGAAGGGTGATAGAGTTGTATTATTCAGCCAGTTTACCATGATGCTGGATATACTAGAGTTCTCTTAAAGCA<br>TCATCAACATAGGTACCTCCGATTAGATGGAAAGACTCAGATTTCTGAAAGGATTCATCTAATTGATGAGTTTAAATACA<br>GATATGGATATCTTTGTATTTCTCTGTCAACTAAAGCTGGTGGACTAGGAATAAATCTTACTTCAGCAAATGTTGTTA<br>TACTTCACGACATTGATTGCAATCCATACAATGACAAACAAGCAGAAGACAGGTGCCATAGAGTTGGTCAGACTAAA<br>GAAGTATTAGTTATTAATTAATAAGCCAAGGAAGTATTGAAGAGTCCA                                                                            | Sigma-Aldrich        | EMU209081        |  |

| gRNA                     |                            |                                    |                          |
|--------------------------|----------------------------|------------------------------------|--------------------------|
| Name                     | Sequence                   | Source                             | Catalog Number           |
| SMARCAD1 Exon2 FW oligo  | CACCGCAGGTTGAAAAGATTCATAT  | Integrated Device Technology, Inc. | N/A                      |
| SMARCAD1 Exon2 RV oligo  | AAACATATGAATCTTTTCAACCTGC  | Integrated Device Technology, Inc. | N/A                      |
| SMARCAD1 Exon24 FW oligo | CACCGCTGTGAACTCTCAATTGATG  | Integrated Device Technology, Inc. | N/A                      |
| SMARCAD1 Exon24 RV oligo | AAACCATCAATTGAGAGTTACAGC   | Integrated Device Technology, Inc. | N/A                      |
| SMARCAD1 Exon2 FW oligo  | CACCGCCACTCCGCCACCATGTTCCG | Integrated Device Technology, Inc. | N/A                      |
| SMARCAD1 Exon2 RV oligo  | AAACCGAACATGGTGGCGGAGTGGC  | Integrated Device Technology, Inc. | N/A                      |
| shRNA                    |                            |                                    |                          |
| Name                     | Sequence                   | Source                             | Catalog Number           |
| shSMARCAD1 #1            | GCCAGGAATTTGCAGGTGTTA      | Sigma-Aldrich                      | TRCN0000095784           |
| shSMARCAD1 #3            | CCAGTATTACACACCTGAGAA      | Sigma-Aldrich                      | TRCN0000095788           |
| Primer                   |                            |                                    |                          |
| Name                     | Sequence                   | Source                             | Comment                  |
| SMARCAD1 primer          | TGAAGGGGAAGTTAGCAGGG       | Integrated Device Technology, Inc. | N/A                      |
| SMARCAD1 primer          | TGGAGCAATTTGGGGAAACG       | Integrated Device Technology, Inc. | N/A                      |
| SMARCAD1 primer          | ACAAAAGCTGGTGGATTAGGA      | Integrated Device Technology, Inc. | N/A                      |
| SMARCAD1 primer          | TCTTCAATCGTCCCTTGGCT       | Integrated Device Technology, Inc. | N/A                      |
| targeting CUE1 FW        | GATGAAGAGTCCCAAGGCCT       | Integrated Device Technology, Inc. | N/A                      |
| targeting CUE1 RV        | ACCAAACATCAGCAAGGCAG       | Integrated Device Technology, Inc. | N/A                      |
| targeting ATPase         | ATGGTGCCCTACTTTGAAGG       | Integrated Device Technology, Inc. | N/A                      |
| targeting ATPase         | TGGAGCCCATATTCTTCAGCA      | Integrated Device Technology, Inc. | N/A                      |
| targeting Helicase       | ACAAAAGCTGGTGGATTAGGA      | Integrated Device Technology, Inc. | N/A                      |
| targeting Helicase       | TCTTCAATCGTCCCTTGGCT       | Integrated Device Technology, Inc. | N/A                      |
| ATPase mutant primer F'  | CGTTGGCTACCCGTGATATTGC     | Integrated Device Technology, Inc. | of mClover-SMARCAD1 full |
| ATPase mutant primer R   | GGCTTGAATAGTTcTTCCTAGGCC   | Integrated Device Technology, Inc. | of mClover-SMARCAD1 full |
| ATPase mutant primer F'  | GCAATATCACGGGTAGCCAACG     | Integrated Device Technology, Inc. | of mClover-SMARCAD1 full |
| ATPase mutant primer R   | GGCCTAGGAagAACTATTCAAGCC   | Integrated Device Technology, Inc. | of mClover-SMARCAD1 full |
